# Supplementary material for: A Pd(ii)-catalyzed denitrative alkyne annulation reaction for the synthesis of cyclopenta[b]chromanes
Source: Royal Society of Chemistry journal article supplement (doi:10.1039/d4qo00344f), 2024-01-01
Supplement: d4qo00344f1.pdf [file d4qo00344f1.pdf]

**Pd(II)-Catalyzed Denitrative Alkyne Annulation Reaction for the Synthesis of  
Cyclopenta[*b*]chromanes**

Pratiksha Bhorali,<sup>†</sup> Deep J. Kalita,<sup>†</sup> Babulal Das<sup>‡</sup> and Sanjib Gogoi<sup>\*†</sup>

<sup>†</sup>Applied Organic Chemistry, Chemical Sciences & Technology Division, CSIR-North East  
Institute of Science and Technology, Jorhat-785006, Academy of Scientific and Innovative  
Research (AcSIR), Ghaziabad-201002, India, Email: skgogoi1@gmail.com,  
sanjibgogoi@neist.res.in

<sup>‡</sup>Department of Chemistry, Indian Institute of Technology Guwahati, Guwahati 781039, India

## **Supporting Information**

## 1. General Information

All the commercially available reagents were used as received. Melting points were measured with a Buchi B-540 melting point apparatus and are uncorrected. All experiments were monitored by thin layer chromatography. TLC was performed on Merck TLC Silica gel 60 F<sub>254</sub> precoated plates. Column chromatography was performed on silica gel (100-200 mesh, Merck). All the heating reactions were performed on oil bath. NMR spectra were recorded on Bruker Avance III 500 or 400 MHz FTNMR spectrometer using tetramethylsilane (TMS) as an internal standard. HRMS data were recorded by mass analyzer of model - Xevo G2-XS Q-TOF, Make-Waters, Software-MassLynx V 4.1.

## 2. Reaction Procedure

**2.1. General procedure for the synthesis of 2-hydroxy nitrostyrenes:** A solution of nitromethane (5 mL), NH<sub>4</sub>OAc (1.0 mmol) and acetic acid (2.0 mL) was stirred at 90 °C for 15 minutes. Then, salicylaldehyde (5 mmol) was added into this mixture. The reaction mixture was then refluxed for 3 hours. After cooling to room temperature, the mixture was extracted with dichloromethane (25 mL × 2). The organic layer was washed with brine and dried over anhydrous Na<sub>2</sub>SO<sub>4</sub>. The solvent was removed under vacuum and the obtained crude product was purified by silica gel (100–200 mesh) column chromatography using EtOAc/Hexane (1: 10) as the eluant.

**Table SI-1.** Optimization of the reaction conditions for **3aa**<sup>a</sup>

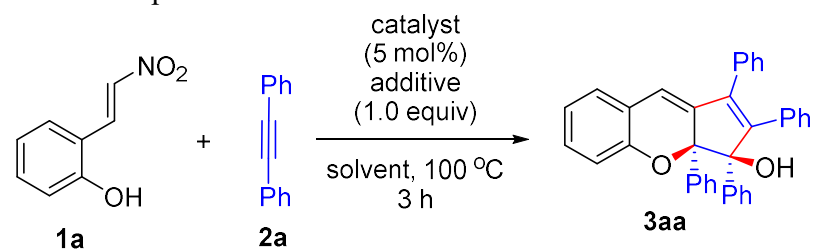

| entry           | catalyst                                                | additive                               | solvent           | <b>3aa</b> <sup>b</sup> (%) |
|-----------------|---------------------------------------------------------|----------------------------------------|-------------------|-----------------------------|
| 1               | [RhCp*Cl <sub>2</sub> ] <sub>2</sub>                    | Cu(OAc) <sub>2</sub> .H <sub>2</sub> O | xylene            | 0                           |
| 2               | [IrCp*Cl <sub>2</sub> ] <sub>2</sub>                    | Cu(OAc) <sub>2</sub> .H <sub>2</sub> O | xylene            | 0                           |
| 3               | [{RuCl <sub>2</sub> ( <i>p</i> -cymene)} <sub>2</sub> ] | Cu(OAc) <sub>2</sub> .H <sub>2</sub> O | xylene            | 0                           |
| 4               | Pd(OAc) <sub>2</sub>                                    | Cu(OAc) <sub>2</sub> .H <sub>2</sub> O | xylene            | 85                          |
| 5               | Pd(OAc) <sub>2</sub>                                    | AgOAc                                  | xylene            | 0                           |
| 6               | Pd(OAc) <sub>2</sub>                                    | NaOAc                                  | xylene            | 49                          |
| 7               | Pd(OAc) <sub>2</sub>                                    | CsOAc                                  | xylene            | 34                          |
| 8               | Pd(OAc) <sub>2</sub>                                    | Cu(OAc) <sub>2</sub> .H <sub>2</sub> O | dioxane           | 0                           |
| 9               | Pd(OAc) <sub>2</sub>                                    | Cu(OAc) <sub>2</sub> .H <sub>2</sub> O | DMF               | 0                           |
| 10              | Pd(OAc) <sub>2</sub>                                    | Cu(OAc) <sub>2</sub> .H <sub>2</sub> O | DMSO              | 0                           |
| 11              | Pd(OAc) <sub>2</sub>                                    | Cu(OAc) <sub>2</sub> .H <sub>2</sub> O | <sup>t</sup> AmOH | 60                          |
| 12              | Pd(OAc) <sub>2</sub>                                    | Cu(OAc) <sub>2</sub> .H <sub>2</sub> O | toluene           | 76                          |
| 13              | Pd(OAc) <sub>2</sub>                                    | Cu(OAc) <sub>2</sub> .H <sub>2</sub> O | PhCl              | 68                          |
| 14              | Pd(OAc) <sub>2</sub>                                    | Cu(OAc) <sub>2</sub> .H <sub>2</sub> O | DCE               | 19                          |
| 15              | Pd(OAc) <sub>2</sub>                                    | Cu(OAc) <sub>2</sub> .H <sub>2</sub> O | MeCN              | 11                          |
| 16 <sup>c</sup> | Pd(OAc) <sub>2</sub>                                    | Cu(OAc) <sub>2</sub> .H <sub>2</sub> O | xylene            | 81                          |
| 17 <sup>d</sup> | Pd(OAc) <sub>2</sub>                                    | Cu(OAc) <sub>2</sub> .H <sub>2</sub> O | xylene            | 60                          |
| 18 <sup>e</sup> | Pd(OAc) <sub>2</sub>                                    | Cu(OAc) <sub>2</sub> .H <sub>2</sub> O | xylene            | 82                          |

<sup>a</sup>Reaction conditions: **1a** (0.25 mmol), **2a** (0.50 mmol), catalyst (5.0 mol%), additive (0.25 mmol) and solvent (3.0 mL) at 100 °C under air for 3 h; unless otherwise mentioned. <sup>b</sup>Isolated yields. <sup>c</sup>Temperature 120 °C. <sup>d</sup>Temperature 80 °C. <sup>e</sup>Time 10 h.

**2.2. General procedure for the synthesis of cyclopenta[*b*]chromanes:** A mixture of 2-hydroxy nitrostyrene (0.25 mmol), diphenyl acetylene (0.50 mmol, 2.0 equiv.), Pd(OAc)<sub>2</sub> (5 mol%), Cu(OAc)<sub>2</sub>.H<sub>2</sub>O (0.25 mmol) in xylene (3.0 mL) was stirred at 100 °C for 3 hours. The solvent was removed under vacuum and the crude reaction mixture was poured into water and extracted with dichloromethane (25 mL × 2). Then the organic layer was washed with brine and dried over anhydrous Na<sub>2</sub>SO<sub>4</sub>. The solvent was removed under vacuum and the obtained crude product was purified by silica gel (100–200 mesh) column chromatography using EtOAc/Hexane as the eluant to afford cyclopenta[*b*]chromane derivatives.

**2.3. General procedure for the synthesis of cyclopentenones:** A mixture of cyclopenta[*b*]chromane (0.1 mmol), In(OTf)<sub>3</sub> (10 mol%) in chlorobenzene (3.0 mL) was stirred at 50 °C for 2 hours. The solvent was removed under vacuum and the crude reaction mixture was poured into water and extracted with dichloromethane (25 mL × 2). Then the organic layer was washed with brine and dried over anhydrous Na<sub>2</sub>SO<sub>4</sub>. The solvent was removed under vacuum and the obtained crude product was purified by silica gel (100–200 mesh) column chromatography using EtOAc/Hexane as the eluant to afford the cyclopentenones.

### 3. Measurement of fluorescence quantum yield ( $\Phi_F$ ):

Fluorescence quantum yields ( $\Phi_F$ ) of the compounds were calculated using quinine sulfate (in 0.5 M H<sub>2</sub>SO<sub>4</sub> solution) as a standard ( $\Phi_F = 0.54$ ). Emission spectra of these compounds were recorded from 370 to 680 nm with excitation at 350 nm. Absorbance (optical density, OD) of all these samples were recorded at 350 nm and quantum yields were calculated according to equation (1), in which  $\Phi_{ref}$  is the quantum yield of the reference,  $A_{sample}$  and  $A_{ref}$  are the areas under the emission spectra of the samples and the reference,  $OD_{ref}$  and  $OD_{sample}$  are the absorbances of the reference and the sample which were measured at the excitation wavelength;  $n_{sample}$  and  $n_{ref}$  are the refractive indices of the sample and the reference in solution.

$$\Phi_F = \Phi_{ref} (A_{sample}/ A_{ref} ) \times ( OD_{ref}/ OD_{sample} ) \times ( n_{ref}/ n_{sample} )^2 \quad (1)$$

| Sl. No | Compound   | $\lambda_{max}$ (nm) | $\lambda_{em}$ (nm) | $\Phi_F$ |
|--------|------------|----------------------|---------------------|----------|
| 1      | <b>3aa</b> | 350                  | 441                 | 0.16     |
| 2      | <b>3ad</b> | 350                  | 452                 | 0.14     |
| 3      | <b>3af</b> | 355                  | 452                 | 0.20     |
| 4      | <b>3ca</b> | 355                  | 442                 | 0.36     |
| 5      | <b>3da</b> | 352                  | 450                 | 0.12     |

|   |            |     |     |      |
|---|------------|-----|-----|------|
| 6 | <b>3ea</b> | 333 | 452 | 0.12 |
| 7 | <b>3ha</b> | 357 | 442 | 0.17 |
| 8 | <b>3ka</b> | 357 | 441 | 0.17 |

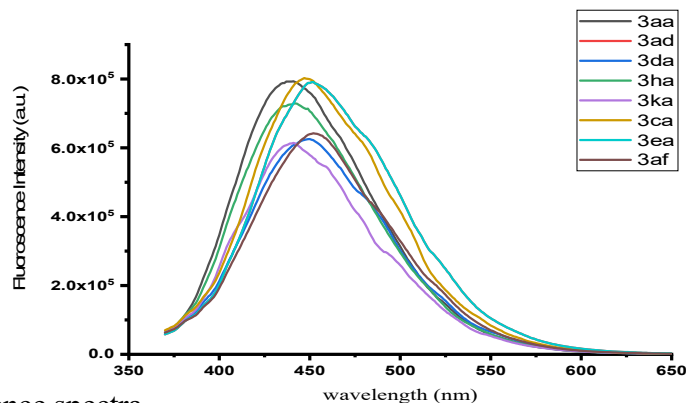

Figure 1. Fluorescence spectra

#### 4. Spectral and Analytical Data:

|                                               |                                                                                                                                                                                                                                                                                                                                                                                                                                                                                                                                                                                                                                                                                                                                                                                                                                                                                                                                                                                                                                                                                                                                                                       |
|-----------------------------------------------|-----------------------------------------------------------------------------------------------------------------------------------------------------------------------------------------------------------------------------------------------------------------------------------------------------------------------------------------------------------------------------------------------------------------------------------------------------------------------------------------------------------------------------------------------------------------------------------------------------------------------------------------------------------------------------------------------------------------------------------------------------------------------------------------------------------------------------------------------------------------------------------------------------------------------------------------------------------------------------------------------------------------------------------------------------------------------------------------------------------------------------------------------------------------------|
| <p style="text-align: center;"><b>3aa</b></p> | <p><b>1,2,3,3a-tetraphenyl-3,3a-dihydrocyclopenta[<i>b</i>]chromen-3-ol (3aa):</b> Following the general procedure <b>2.2</b>, the reaction was carried out by heating a mixture of 2-hydroxynitrostyrene <b>1a</b> (41 mg, 0.25 mmol), alkyne <b>2a</b> (89 mg, 0.50 mmol), [Pd(OAc)<sub>2</sub>] (3 mg, 5 mol%) and Cu(OAc)<sub>2</sub>·H<sub>2</sub>O (50 mg, 0.25 mmol) in xylene (3.0 mL) at 100 °C for 3 h under air to afford the title compound. The product was purified by flash column chromatography on silica gel (3% EtOAc in hexane); 81% yield (pale yellow solid, 99 mg); mp 176-178 °C. <sup>1</sup>H NMR (400 MHz, CDCl<sub>3</sub>) δ 7.53–7.50 (m, 2H), 7.45–7.39 (m, 3H), 7.24–7.20 (m, 3H), 7.15–6.92 (m, 11H), 6.87–6.80 (m, 5H), 6.56 (s, 1H), 4.97 (s, 1H). <sup>13</sup>C NMR (100 MHz, CDCl<sub>3</sub>) δ 152.9, 148.0, 144.5, 142.2, 139.9, 139.7, 134.6, 134.0, 129.9, 129.8, 128.9, 128.8, 128.5, 128.2, 127.7, 127.6, 127.5, 127.4, 127.3, 127.1, 126.6, 126.3, 124.0, 122.6, 117.7, 117.6, 90.1, 87.5. HRMS Calcd (ESI) <i>m/z</i> for C<sub>36</sub>H<sub>26</sub>O<sub>2</sub>: [M–OH]<sup>+</sup> 473.1905, found: 473.1902.</p> |
|-----------------------------------------------|-----------------------------------------------------------------------------------------------------------------------------------------------------------------------------------------------------------------------------------------------------------------------------------------------------------------------------------------------------------------------------------------------------------------------------------------------------------------------------------------------------------------------------------------------------------------------------------------------------------------------------------------------------------------------------------------------------------------------------------------------------------------------------------------------------------------------------------------------------------------------------------------------------------------------------------------------------------------------------------------------------------------------------------------------------------------------------------------------------------------------------------------------------------------------|

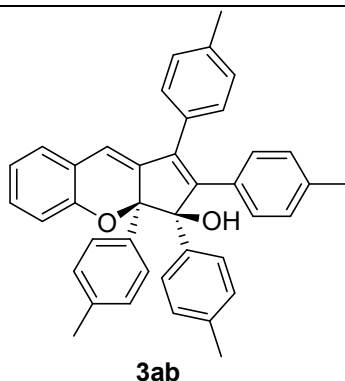

**1,2,3,3a-tetra-*p*-tolyl-3,3a-dihydrocyclopenta[*b*]chromen-3-ol (3ab):** Following the general procedure **2.2**, the reaction was carried out by heating a mixture of 2-hydroxynitrostyrene **1a** (41 mg, 0.25 mmol), alkyne **2b** (103 mg, 0.50 mmol), [Pd(OAc)<sub>2</sub>] (3 mg, 5 mol%) and Cu(OAc)<sub>2</sub>·H<sub>2</sub>O (50 mg, 0.25 mmol) in xylene (3.0 mL) at 100 °C for 3 h under air to afford the title compound. The product was purified by flash column chromatography on silica gel (3% EtOAc in hexane); 83% yield (pale yellow solid, 113 mg); mp 133-135 °C. <sup>1</sup>H NMR (400 MHz, CDCl<sub>3</sub>) δ 7.40 (d, *J* = 8.0 Hz, 2H), 7.24 (d, *J* = 7.8 Hz, 2H), 7.10 (d, *J* = 8.2 Hz, 2H), 7.06–6.94 (m, 5H), 6.83–6.79 (m, 3H), 6.75–6.64 (m, 6H), 6.52 (s, 1H), 4.88 (s, 1H), 2.43 (s, 3H), 2.17 (s, 3H), 2.13 (s, 3H), 2.12 (s, 3H). <sup>13</sup>C NMR (100 MHz, CDCl<sub>3</sub>) δ 153.0, 147.9, 145.1, 141.4, 138.1, 137.0, 136.9, 136.7, 135.5, 131.9, 131.3, 129.8, 129.7, 129.5, 128.5, 128.4, 128.1, 127.7, 127.5, 127.3, 127.2, 124.2, 122.4, 117.7, 116.9, 89.9, 87.6, 21.6, 21.4, 21.1, 21.0. HRMS Calcd (ESI) *m/z* for C<sub>40</sub>H<sub>34</sub>O<sub>2</sub>: [M–OH]<sup>+</sup> 529.2531, found: 529.2528.

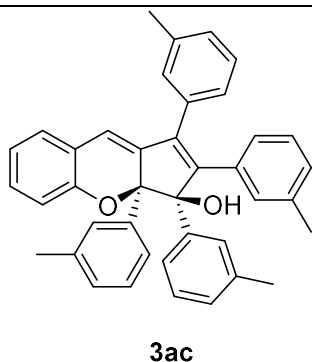

**1,2,3,3a-tetra-*m*-tolyl-3,3a-dihydrocyclopenta[*b*]chromen-3-ol (3ac):** Following the general procedure **2.2**, the reaction was carried out by heating a mixture of 2-hydroxynitrostyrene **1a** (41 mg, 0.25 mmol), alkyne **2c** (103 mg, 0.50 mmol), [Pd(OAc)<sub>2</sub>] (3 mg, 5 mol%) and Cu(OAc)<sub>2</sub>·H<sub>2</sub>O (50 mg, 0.25 mmol) in xylene (3.0 mL) at 100 °C for 3 h under air to afford the title compound. The product was purified by flash column chromatography on silica gel (3% EtOAc in hexane); 71% yield (pale yellow solid, 97 mg); mp 98-100 °C. <sup>1</sup>H NMR (400 MHz, CDCl<sub>3</sub>) δ 7.33–7.28 (m, 3H), 7.21–7.19 (m, 1H), 7.07–6.96 (m, 6H), 6.90–6.80 (m, 5H), 6.75–6.57 (m, 5H), 6.53 (s, 1H), 4.90 (s, 1H), 2.38 (s, 3H), 2.06 (s, 3H), 2.04 (s, 3H), 2.01 (s, 3H). <sup>13</sup>C NMR (100 MHz, CDCl<sub>3</sub>) δ 153.0, 148.0, 144.7,

|                                                                                                                                 |                                                                                                                                                                                                                                                                                                                                                                                                                                                                                                                                                                                                                                                                                                                                                                                                                                                                                                                                                                                                                                                                                                                                                                                                                                                                                                                                                                                                                                                                                                                                                                                                                             |
|---------------------------------------------------------------------------------------------------------------------------------|-----------------------------------------------------------------------------------------------------------------------------------------------------------------------------------------------------------------------------------------------------------------------------------------------------------------------------------------------------------------------------------------------------------------------------------------------------------------------------------------------------------------------------------------------------------------------------------------------------------------------------------------------------------------------------------------------------------------------------------------------------------------------------------------------------------------------------------------------------------------------------------------------------------------------------------------------------------------------------------------------------------------------------------------------------------------------------------------------------------------------------------------------------------------------------------------------------------------------------------------------------------------------------------------------------------------------------------------------------------------------------------------------------------------------------------------------------------------------------------------------------------------------------------------------------------------------------------------------------------------------------|
|                                                                                                                                 | <p>142.1, 139.8, 138.3, 136.9, 136.4, 135.9, 134.7, 134.2, 130.3, 129.1, 128.9, 128.6, 128.1, 127.9, 127.4, 127.0, 126.8, 126.7, 126.3, 125.2, 124.6, 124.2, 122.5, 117.7, 117.2, 90.1, 87.5, 21.7, 21.5, 21.3. HRMS Calcd (ESI) <math>m/z</math> for <math>C_{40}H_{34}O_2</math>: <math>[M-OH]^+</math> 529.2531, found: 529.2529.</p>                                                                                                                                                                                                                                                                                                                                                                                                                                                                                                                                                                                                                                                                                                                                                                                                                                                                                                                                                                                                                                                                                                                                                                                                                                                                                    |
| 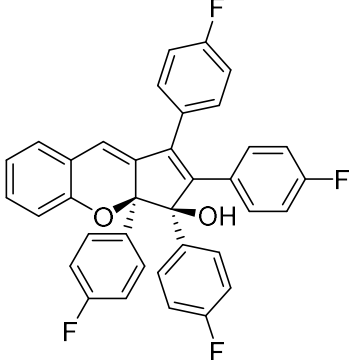 <p style="text-align: center;"><b>3ad</b></p> | <p><b>1,2,3,3a-tetrakis(4-fluorophenyl)-3,3a-dihydrocyclopenta[b]chromen-3-ol (3ad):</b> Following the general procedure <b>2.2</b>, the reaction was carried out by heating a mixture of 2-hydroxynitrostyrene <b>1a</b> (41 mg, 0.25 mmol), alkyne <b>2d</b> (107 mg, 0.50 mmol), <math>[Pd(OAc)_2]</math> (3 mg, 5 mol%) and <math>Cu(OAc)_2 \cdot H_2O</math> (50 mg, 0.25 mmol) in xylene (3.0 mL) at 100 °C for 3 h under air to afford the title compound. The product was purified by flash column chromatography on silica gel (3% EtOAc in hexane); 79% yield (white solid, 111 mg); mp 211–213 °C. <math>^1H</math> NMR (400 MHz, <math>CDCl_3</math>) <math>\delta</math> 7.47–7.43 (m, 2H), 7.17–7.07 (m, 7H), 7.01–6.98 (m, 3H), 6.89–6.85 (m, 1H), 6.75–6.59 (m, 7H), 6.56 (s, 1H), 4.93 (s, 1H). <math>^{13}C</math> NMR (100 MHz, <math>CDCl_3</math>) <math>\delta</math> 162.9 (d, <math>J = 248</math>), 162.2 (d, <math>J = 247</math>), 162.1 (d, <math>J = 246</math>), 161.6 (d, <math>J = 245</math>), 152.6, 146.9, 143.7, 140.9, 135.4, 135.3, 135.3, 131.6, 131.6, 131.5, 130.2 (d, <math>J = 4</math>), 129.4 (d, <math>J = 4</math>), 129.8, 129.7, 129.3, 129.2, 127.6, 123.7, 122.9, 118.0, 117.9 (d, <math>J = 29</math>), 116.2 (d, <math>J = 22</math>), 115.1 (d, <math>J = 21</math>), 114.4 (d, <math>J = 22</math>), 113.9 (d, <math>J = 21</math>), 89.6, 86.8. <math>^{19}F</math> NMR (<math>CDCl_3</math>, 376 MHz): –111.9, –112.6, –114.1, –115.7. HRMS Calcd (ESI) <math>m/z</math> for <math>C_{36}H_{22}F_4O_2</math>: <math>[M-OH]^+</math> 545.1527, found: 545.1526.</p> |

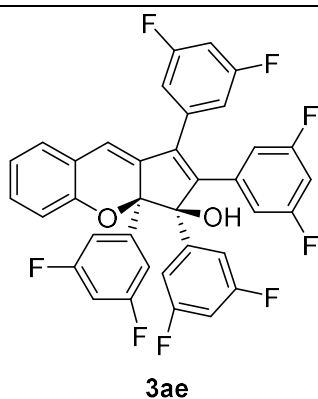

**1,2,3,3a-tetrakis(3,5-difluorophenyl)-3,3a-**

**dihydrocyclopenta[b]chromen-3-ol (3ae):** Following the general procedure 2.2, the reaction was carried out by heating a mixture of 2-hydroxynitrostyrene **1a** (41 mg, 0.25 mmol), alkyne **2e** (125 mg, 0.50 mmol), [Pd(OAc)<sub>2</sub>] (3 mg, 5 mol%) and Cu(OAc)<sub>2</sub>·H<sub>2</sub>O (50 mg, 0.25 mmol) in xylene (3.0 mL) at 100 °C for 3 h under air to afford the title compound. The product was purified by flash column chromatography on silica gel (3% EtOAc in hexane); 73% yield (pale yellow sticky solid, 115 mg). <sup>1</sup>H NMR (500 MHz, CDCl<sub>3</sub>) δ 7.20–7.17 (m, 1H), 7.08–7.05 (m, 2H), 6.97–6.75 (m, 7H), 6.63–6.48 (m, 7H), 4.98 (s, 1H). <sup>13</sup>C NMR (100 MHz, CDCl<sub>3</sub>) δ 163.6 (d, *J* = 249 Hz), 163.5 (d, *J* = 250 Hz), 162.8 (d, *J* = 247 Hz), 162.7 (d, *J* = 248 Hz), 162.5 (d, *J* = 247 Hz), 162.4 (d, *J* = 247 Hz), 152.2, 145.5, 143.2, 143.1, 141.7, 140.8, 136.3, 135.5, 130.4, 128.3, 123.6, 122.8, 120.3, 117.9, 112.6 (d, *J* = 26 Hz), 112.5 (d, *J* = 12 Hz), 112.3 (d, *J* = 26 Hz), 112.2 (d, *J* = 12 Hz), 111.1 (d, *J* = 23 Hz), 110.8 (d, *J* = 28 Hz), 105.2 (d, *J* = 25 Hz), 105.0 (d, *J* = 25 Hz), 104.5 (d, *J* = 26 Hz), 104.2 (d, *J* = 26 Hz), 104.0 (d, *J* = 26 Hz), 103.8 (d, *J* = 26 Hz), 103.2 (d, *J* = 25 Hz), 102.9 (d, *J* = 25 Hz), 89.4, 86.1. <sup>19</sup>F NMR (CDCl<sub>3</sub>, 376 MHz): –107.3, –108.6, –109.0. HRMS Calcd (ESI) *m/z* for C<sub>36</sub>H<sub>18</sub>F<sub>8</sub>O<sub>2</sub>: [M–OH]<sup>+</sup> 617.1152, found: 617.1148.

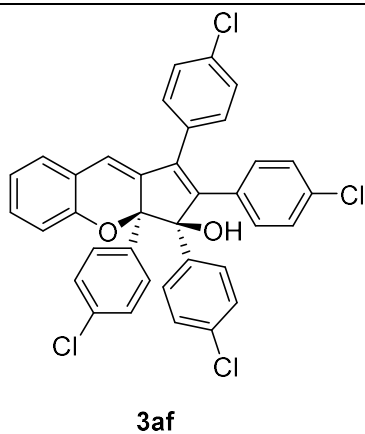

**1,2,3,3a-tetrakis(4-chlorophenyl)-3,3a-dihydrocyclopenta[b]**

**chromen-3-ol (3af):** Following the general procedure 2.2, the reaction was carried out by heating a mixture of 2-hydroxynitrostyrene **1a** (41 mg, 0.25 mmol), alkyne **2f** (123 mg, 0.50 mmol), [Pd(OAc)<sub>2</sub>] (3 mg, 5 mol%) and Cu(OAc)<sub>2</sub>·H<sub>2</sub>O (50 mg, 0.25 mmol) in xylene (3.0 mL) at 100 °C for 3 h under air to afford the title compound. The product was purified by flash column chromatography on silica gel (3%



|                                                                                                                                 |                                                                                                                                                                                                                                                                                                                                                                                                                                                                                                                                                                                                                                                                                                                                                                                                                                                                                                                                                                                                                                                                                                                                                                                                  |
|---------------------------------------------------------------------------------------------------------------------------------|--------------------------------------------------------------------------------------------------------------------------------------------------------------------------------------------------------------------------------------------------------------------------------------------------------------------------------------------------------------------------------------------------------------------------------------------------------------------------------------------------------------------------------------------------------------------------------------------------------------------------------------------------------------------------------------------------------------------------------------------------------------------------------------------------------------------------------------------------------------------------------------------------------------------------------------------------------------------------------------------------------------------------------------------------------------------------------------------------------------------------------------------------------------------------------------------------|
|                                                                                                                                 | <p>EtOAc in hexane); 85% yield (white solid, 133 mg); mp 183–185 °C. <sup>1</sup>H NMR (500 MHz, CDCl<sub>3</sub>) δ 7.44–7.39 (m, 4H), 7.11–7.09 (m, 3H), 7.02–6.96 (m, 8H), 6.90–6.74 (m, 5H), 6.57 (s, 1H), 4.94 (s, 1H). <sup>13</sup>C NMR (100 MHz, CDCl<sub>3</sub>) δ 152.5, 146.8, 143.1, 141.3, 137.9, 137.8, 134.9, 133.8, 133.7, 132.8, 132.4, 131.7, 131.1, 130.9, 129.5, 129.4, 128.8, 128.4, 127.8, 127.7, 127.2, 123.5, 123.1, 118.6, 117.7, 89.5, 86.8.</p>                                                                                                                                                                                                                                                                                                                                                                                                                                                                                                                                                                                                                                                                                                                     |
| 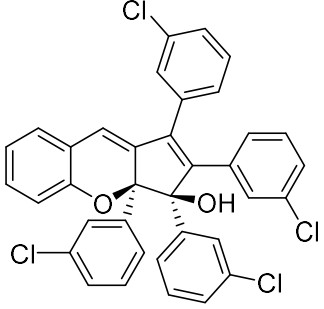 <p style="text-align: center;"><b>3ag</b></p> | <p><b>1,2,3,3a-tetrakis(3-chlorophenyl)-3,3a-dihydrocyclopenta[b]chromen-3-ol (3ag):</b> Following the general procedure 2.2, the reaction was carried out by heating a mixture of 2-hydroxynitrostyrene <b>1a</b> (41 mg, 0.25 mmol), alkyne <b>2g</b> (123 mg, 0.50 mmol), [Pd(OAc)<sub>2</sub>] (3 mg, 5 mol%) and Cu(OAc)<sub>2</sub>·H<sub>2</sub>O (50 mg, 0.25 mmol) in xylene (3.0 mL) at 100 °C for 3 h under air to afford the title compound. The product was purified by flash column chromatography on silica gel (3% EtOAc in hexane); 61% yield (yellow sticky, 95 mg). <sup>1</sup>H NMR (400 MHz, CDCl<sub>3</sub>) δ 7.49 (t, <i>J</i> = 1.8 Hz, 1H), 7.44–7.28 (m, 4H), 7.21 (t, <i>J</i> = 1.8 Hz, 1H), 7.15–7.03 (m, 7H), 7.01–6.88 (m, 6H), 6.78–7.74 (m, 1H), 6.59 (s, 1H), 4.95 (s, 1H). <sup>13</sup>C NMR (100 MHz, CDCl<sub>3</sub>) δ 152.4, 146.5, 142.4, 141.8, 141.4, 135.6, 134.9, 133.9, 133.5, 130.5, 129.7, 129.4, 129.3, 129.2, 128.7, 128.2, 128.1, 127.9, 127.8, 127.2, 123.4, 123.2, 119.1, 117.9, 89.6, 86.7. HRMS Calcd (ESI) <i>m/z</i> for C<sub>36</sub>H<sub>22</sub>Cl<sub>4</sub>O<sub>2</sub>: [M–OH]<sup>+</sup> 609.0347, found: 609.0345.</p> |

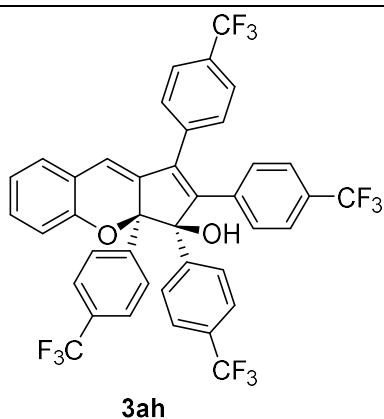

**1,2,3,3a-tetrakis(4-(trifluoromethyl)phenyl)-3,3a-**

**dihydrocyclopenta[b]chromen-3-ol (3ah):** Following the general procedure 2.2, the reaction was carried out by heating a mixture of 2-hydroxynitrostyrene **1a** (41 mg, 0.25 mmol), alkyne **2h** (157 mg, 0.50 mmol), [Pd(OAc)<sub>2</sub>] (3 mg, 5 mol%) and Cu(OAc)<sub>2</sub>·H<sub>2</sub>O (50 mg, 0.25 mmol) in xylene (3.0 mL) at 100 °C for 3 h under air to afford the title compound. The product was purified by flash column chromatography on silica gel (3% EtOAc in hexane); 56% yield (pale yellow sticky solid, 106 mg). <sup>1</sup>H NMR (400 MHz, CDCl<sub>3</sub>) δ 7.75 (d, *J* = 8.6 Hz, 2H), 7.60 (d, *J* = 7.9 Hz, 2H), 7.39–7.31 (m, 4H), 7.24–7.11 (m, 7H), 7.06–7.02 (m, 3H), 6.94–6.90 (m, 2H), 6.62 (s, 1H), 5.09 (s, 1H). <sup>13</sup>C NMR (100 MHz, CDCl<sub>3</sub>) δ 152.3, 146.5, 143.3, 142.9, 142.6, 142.1, 137.2, 136.7, 130.1, 129.4 (d, *J* = 32 Hz), 128.2, 128.1, 127.5, 126.3 (d, *J* = 3 Hz), 125.3 (d, *J* = 4 Hz), 124.5 (d, *J* = 3 Hz), 124.1, 123.5, 123.2, 123.0 (d, *J* = 272 Hz) 119.8, 117.8, 89.9, 86.9.

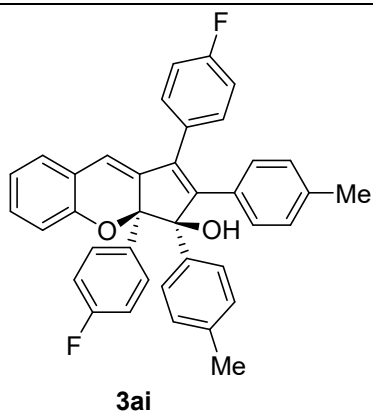

**2,3-bis(4-fluorophenyl)-1,3a-di-*p*-tolyl-3,3a-dihydrocyclopenta[b]chromen-3-ol (3ai, mixture of isomers 2:2:1:1):**

Following the general procedure 2.2, the reaction was carried out by heating a mixture of 2-hydroxynitrostyrene **1a** (41 mg, 0.25 mmol), alkyne **2i** (105 mg, 0.25 mmol), [Pd(OAc)<sub>2</sub>] (3 mg, 5 mol%) and Cu(OAc)<sub>2</sub>·H<sub>2</sub>O (50 mg, 0.50 mmol) in xylene (3.0 mL) at 100 °C for 3 h under air to afford the title compound. The product was purified by flash column chromatography on silica gel (3% EtOAc in hexane); 54% yield (yellow solid, 76 mg); mp 97-99 °C. <sup>1</sup>H NMR (400 MHz, CDCl<sub>3</sub>) δ 7.49–7.35 (m, 2H), 7.25–6.96 (m, 9H), 6.87–6.63 (m, 8H), 6.56–6.52 (m, 2H), 4.99–4.80 (bs, 1H), 2.43 (s, 2H), 2.18 (s, 1H), 2.14 (s, 1H), 2.12 (s, 2H). <sup>13</sup>C NMR (100 MHz, CDCl<sub>3</sub>) δ 162.0 (d, *J* = 246 Hz), 152.9, 152.7, 144.3, 142.1,

|                                                                                                                                 |                                                                                                                                                                                                                                                                                                                                                                                                                                                                                                                                                                                                                                                                                                                                                                                                                                                                                                                                                                                                                                                                                                                                                                                                                                                                                                                                                                                                                                                                              |
|---------------------------------------------------------------------------------------------------------------------------------|------------------------------------------------------------------------------------------------------------------------------------------------------------------------------------------------------------------------------------------------------------------------------------------------------------------------------------------------------------------------------------------------------------------------------------------------------------------------------------------------------------------------------------------------------------------------------------------------------------------------------------------------------------------------------------------------------------------------------------------------------------------------------------------------------------------------------------------------------------------------------------------------------------------------------------------------------------------------------------------------------------------------------------------------------------------------------------------------------------------------------------------------------------------------------------------------------------------------------------------------------------------------------------------------------------------------------------------------------------------------------------------------------------------------------------------------------------------------------|
|                                                                                                                                 | <p>141.8, 138.6, 137.6, 137.2, 136.6, 136.4, 136.1, 135.7, 131.6, 131.5, 130.8, 129.7, 129.3, 128.9, 128.6, 128.0, 127.6, 123.8, 122.7 (d, <math>J = 7</math> Hz), 117.7, 117.2, 116.1, 115.9, 115.0 (d, <math>J = 21</math> Hz), 114.8 (d, <math>J = 21</math> Hz), 114.2, 113.9, 113.6 (d, <math>J = 21</math> Hz), 113.4 (d, <math>J = 21</math> Hz), 89.8, 89.6, 87.0, 21.6, 21.4, 21.1, 14.2. <math>^{19}\text{F}</math> NMR (<math>\text{CDCl}_3</math>, 376 MHz): <math>-112.6, -113.5, -114.9, -116.6</math>. HRMS Calcd (ESI) <math>m/z</math> for <math>\text{C}_{38}\text{H}_{28}\text{F}_2\text{O}_2</math>: <math>[\text{M}-\text{OH}]^+</math> 537.2030, found: 537.2031.</p>                                                                                                                                                                                                                                                                                                                                                                                                                                                                                                                                                                                                                                                                                                                                                                                  |
| 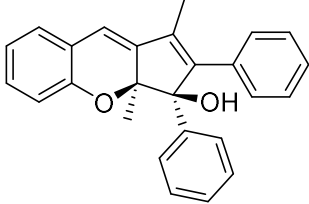 <p style="text-align: center;"><b>3aj</b></p> | <p><b>1,3-dimethyl-2,3a-diphenyl-3,3a-dihydrocyclopenta[b]chromen-3-ol (3aj, mixture 4.9:1):</b> Following the general procedure <b>2.2</b>, the reaction was carried out by heating a mixture of 2-hydroxynitrostyrene <b>1a</b> (41 mg, 0.25 mmol), alkyne <b>2j</b> (58 mg, 0.50 mmol), <math>[\text{Pd}(\text{OAc})_2]</math> (3 mg, 5 mol%) and <math>\text{Cu}(\text{OAc})_2 \cdot \text{H}_2\text{O}</math> (50 mg, 0.25 mmol) in xylene (3.0 mL) at <math>100^\circ\text{C}</math> for 3 h under air to afford the title compound. The product was purified by flash column chromatography on silica gel (2 % EtOAc in hexane) 71% yield (pale yellow liquid, 65 mg). <math>^1\text{H}</math> NMR (500 MHz, <math>\text{CDCl}_3</math>) <math>\delta</math> 7.52–7.41 (m, 8H), 7.37–7.33 (m, 1H), 7.24–7.04 (m, 3H), 6.96–6.91 (m, 2H), 6.25 (s, 0.17H), 6.23 (s, 0.83H), 4.56–4.53 (m, 0.17H), 4.43 (s, 0.83H), 1.93 (s, 2.5H), 1.64 (s, 0.5H), 1.28 (s, 0.5H), 0.99 (s, 2.5H). <math>^{13}\text{C}</math> NMR (100 MHz, <math>\text{CDCl}_3</math>) <math>\delta</math> 151.7, 146.5, 144.9, 139.8, 139.5, 134.0, 132.5, 130.4, 129.2, 128.6, 128.4, 128.3, 128.0, 127.9, 127.6, 127.2, 126.5, 124.9, 124.2, 123.5, 122.3, 119.3, 117.5, 112.9, 111.2, 87.2, 83.5, 83.2, 73.6, 42.0, 29.8, 21.6, 12.6. HRMS Calcd (ESI) <math>m/z</math> for <math>\text{C}_{26}\text{H}_{22}\text{O}_2</math>: <math>[\text{M}-\text{OH}]^+</math> 349.1592, found: 349.1587.</p> |
|                                                                                                                                 | <p><b>5-methyl-1,2,3,3a-tetraphenyl-3,3a-dihydrocyclopenta[b]chromen-3-ol (3ba):</b> Following the general procedure <b>2.2</b>, the reaction was carried out by heating a mixture of 2-hydroxynitrostyrene <b>1b</b> (45 mg, 0.25 mmol), alkyne <b>2a</b> (89 mg,</p>                                                                                                                                                                                                                                                                                                                                                                                                                                                                                                                                                                                                                                                                                                                                                                                                                                                                                                                                                                                                                                                                                                                                                                                                       |

|                                                                                                                                  |                                                                                                                                                                                                                                                                                                                                                                                                                                                                                                                                                                                                                                                                                                                                                                                                                                                                                                                                                                                                                                                                                                                                                                              |
|----------------------------------------------------------------------------------------------------------------------------------|------------------------------------------------------------------------------------------------------------------------------------------------------------------------------------------------------------------------------------------------------------------------------------------------------------------------------------------------------------------------------------------------------------------------------------------------------------------------------------------------------------------------------------------------------------------------------------------------------------------------------------------------------------------------------------------------------------------------------------------------------------------------------------------------------------------------------------------------------------------------------------------------------------------------------------------------------------------------------------------------------------------------------------------------------------------------------------------------------------------------------------------------------------------------------|
| 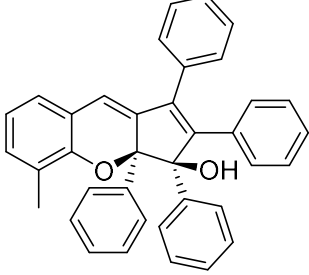 <p style="text-align: center;"><b>3ba</b></p>  | <p>0.50 mmol), [Pd(OAc)<sub>2</sub>] (3 mg, 5 mol%) and Cu(OAc)<sub>2</sub>·H<sub>2</sub>O (50 mg, 0.25 mmol) in xylene (3.0 mL) at 100 °C for 3 h under air to afford the title compound. The product was purified by flash column chromatography on silica gel (3% EtOAc in hexane); 73% yield (white solid, 92 mg); mp 194-196 °C. <sup>1</sup>H NMR (400 MHz, CDCl<sub>3</sub>) δ 7.45–7.43 (m, 2H), 7.37–7.31 (m, 3H), 7.16–7.04 (m, 4H), 6.93–6.73 (m, 13H), 6.67–6.64 (m, 1H), 6.48 (s, 1H), 4.99 (s, 1H), 2.30 (s, 3H). <sup>13</sup>C NMR (100 MHz, CDCl<sub>3</sub>) δ 150.9, 147.7, 143.9, 142.1, 140.1, 140.0, 134.7, 134.1, 130.5, 129.9, 129.8, 128.5, 128.1, 127.7, 127.4, 127.3, 127.3, 127.1, 126.7, 126.3, 126.2, 125.3, 123.5, 122.1, 117.9, 90.2, 87.7, 15.9. HRMS Calcd (ESI) m/z for C<sub>37</sub>H<sub>28</sub>O<sub>2</sub>: [M–OH]<sup>+</sup> 487.2062, found: 487.2060.</p>                                                                                                                                                                                                                                                                      |
|  <p style="text-align: center;"><b>3ca</b></p> | <p><b>6-methyl-1,2,3,3a-tetraphenyl-3,3a-dihydrocyclopenta[b]chromen-3-ol (3ca):</b> Following the general procedure 2.2, the reaction was carried out by heating a mixture of 2-hydroxynitrostyrene 1c (45 mg, 0.25 mmol), alkyne 2a (89 mg, 0.50 mmol), [Pd(OAc)<sub>2</sub>] (3 mg, 5 mol%) and Cu(OAc)<sub>2</sub>·H<sub>2</sub>O (50 mg, 0.25 mmol) in xylene (3.0 mL) at 100 °C for 3 h under air to afford the title compound. The product was purified by flash column chromatography on silica gel (3% EtOAc in hexane); 80% yield (pale yellow solid, 101 mg); mp 196-198 °C. <sup>1</sup>H NMR (400 MHz, CDCl<sub>3</sub>) δ 7.55–7.52 (m, 2H), 7.46–7.40 (m, 3H), 7.37–7.29 (m, 1H), 7.24–7.16 (m, 4H), 7.01–6.84 (m, 12H), 6.67–6.65 (m, 1H), 6.55 (s, 1H), 4.99 (s, 1H), 2.26 (s, 3H). <sup>13</sup>C NMR (100 MHz, CDCl<sub>3</sub>) δ 152.8, 147.3, 143.4, 142.2, 140.0, 139.8, 139.3, 134.7, 134.1, 129.9, 129.8, 128.8, 128.4, 128.2, 127.7, 127.6, 127.3, 127.2, 127.1, 126.6, 126.2, 123.4, 121.3, 118.3, 117.7, 90.1, 87.6, 21.6. HRMS Calcd (ESI) m/z for C<sub>37</sub>H<sub>28</sub>O<sub>2</sub>: [M–OH]<sup>+</sup> 487.2062, found: 487.2058.</p> |

|                                                                                                                                   |                                                                                                                                                                                                                                                                                                                                                                                                                                                                                                                                                                                                                                                                                                                                                                                                                                                                                                                                                                                                                                                                                                                                                                    |
|-----------------------------------------------------------------------------------------------------------------------------------|--------------------------------------------------------------------------------------------------------------------------------------------------------------------------------------------------------------------------------------------------------------------------------------------------------------------------------------------------------------------------------------------------------------------------------------------------------------------------------------------------------------------------------------------------------------------------------------------------------------------------------------------------------------------------------------------------------------------------------------------------------------------------------------------------------------------------------------------------------------------------------------------------------------------------------------------------------------------------------------------------------------------------------------------------------------------------------------------------------------------------------------------------------------------|
| 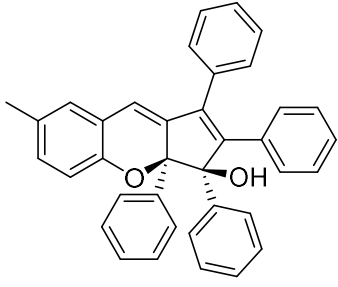 <p style="text-align: center;"><b>3da</b></p>   | <p><b>7-methyl-1,2,3,3a-tetraphenyl-3,3a-dihydrocyclopenta[b]chromen-3-ol (3da):</b> Following the general procedure <b>2.2</b>, the reaction was carried out by heating a mixture of 2-hydroxynitrostyrene <b>1d</b> (45 mg, 0.50 mmol), alkyne <b>2a</b> (89 mg, 0.25 mmol), [Pd(OAc)<sub>2</sub>] (3 mg, 5 mol%) and Cu(OAc)<sub>2</sub>·H<sub>2</sub>O (50 mg, 0.25 mmol) in xylene (3.0 mL) at 100 °C for 3 h under air to afford the title compound. The product was purified by flash column chromatography on silica gel (3% EtOAc in hexane); 83% yield (pale yellow solid, 104 mg); mp 186-188 °C. <sup>1</sup>H NMR (400 MHz, CDCl<sub>3</sub>) δ 7.55–7.53 (m, 2H), 7.47–7.41 (m, 3H), 7.25–7.16 (m, 3H), 7.03–6.79 (m, 15H), 6.55 (s, 1H), 5.05 (s, 1H), 2.17 (s, 3H). <sup>13</sup>C NMR (100 MHz, CDCl<sub>3</sub>) δ 150.7, 147.8, 144.6, 142.2, 139.9, 139.8, 134.7, 134.0, 131.7, 129.9, 129.8, 129.4, 128.8, 128.4, 128.2, 127.9, 127.7, 127.5, 127.4, 127.2, 127.1, 126.6, 126.2, 123.7, 117.7, 117.4, 90.0, 87.5, 20.7. HRMS Calcd (ESI) m/z for C<sub>37</sub>H<sub>28</sub>O<sub>2</sub>: [M–OH]<sup>+</sup> 487.2062, found: 487.2061.</p> |
|  <p style="text-align: center;"><b>3ea</b></p> | <p><b>5-methoxy-1,2,3,3a-tetraphenyl-3,3a-dihydrocyclopenta[b]chromen-3-ol (3ea):</b> Following the general procedure <b>2.2</b>, the reaction was carried out by heating a mixture of 2-hydroxynitrostyrene <b>1e</b> (48 mg, 0.25 mmol), alkyne <b>2a</b> (89 mg, 0.50 mmol), [Pd(OAc)<sub>2</sub>] (3 mg, 5 mol%) and Cu(OAc)<sub>2</sub>·H<sub>2</sub>O (50 mg, 0.25 mmol) in xylene (3.0 mL) at 100 °C for 3 h under air to afford the title compound. The product was purified by flash column chromatography on silica gel (4% EtOAc in hexane); 75% yield (pale yellow solid, 98 mg); mp 216-218 °C. <sup>1</sup>H NMR (400 MHz, CDCl<sub>3</sub>) δ 7.55–7.52 (m, 2H), 7.46–7.40 (m, 3H), 7.26–7.23 (m, 4H), 7.02–6.84 (m, 11H), 6.80–6.75 (m, 1H), 6.72–6.69 (m, 1H), 6.62–6.59 (m, 1H), 6.56 (s, 1H), 5.12 (s, 1H), 3.88 (s, 3H). <sup>13</sup>C NMR (100 MHz, CDCl<sub>3</sub>) δ 149.2, 148.1, 145.1, 142.1, 141.8, 139.9, 139.8, 134.7, 134.0,</p>                                                                                                                                                                                                   |

|                                                                                                                                   |                                                                                                                                                                                                                                                                                                                                                                                                                                                                                                                                                                                                                                                                                                                                                                                                                                                                                                                                                                                                                                                                                                                                                                                                                                                                                 |
|-----------------------------------------------------------------------------------------------------------------------------------|---------------------------------------------------------------------------------------------------------------------------------------------------------------------------------------------------------------------------------------------------------------------------------------------------------------------------------------------------------------------------------------------------------------------------------------------------------------------------------------------------------------------------------------------------------------------------------------------------------------------------------------------------------------------------------------------------------------------------------------------------------------------------------------------------------------------------------------------------------------------------------------------------------------------------------------------------------------------------------------------------------------------------------------------------------------------------------------------------------------------------------------------------------------------------------------------------------------------------------------------------------------------------------|
|                                                                                                                                   | <p>129.9, 129.8, 128.4, 128.2, 127.7, 127.4, 127.2, 127.1, 126.6, 126.1, 124.9, 122.2, 119.6, 117.6, 112.1, 90.1, 87.7, 56.2. HRMS Calcd (ESI) m/z for C<sub>37</sub>H<sub>28</sub>O<sub>3</sub>: [M-OH]<sup>+</sup> 503.2011, found: 503.2010.</p>                                                                                                                                                                                                                                                                                                                                                                                                                                                                                                                                                                                                                                                                                                                                                                                                                                                                                                                                                                                                                             |
| 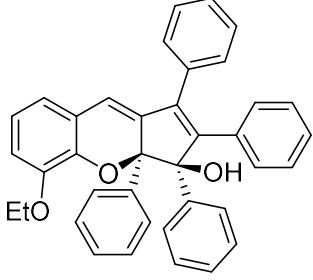 <p style="text-align: center;"><b>3fa</b></p>   | <p><b>5-ethoxy-1,2,3,3a-tetraphenyl-3,3a-dihydrocyclopenta[b]chromen-3-ol (3fa):</b> Following the general procedure 2.2, the reaction was carried out by heating a mixture of 2-hydroxynitrostyrene <b>1f</b> (52 mg, 0.25 mmol), alkyne <b>2a</b> (89 mg, 0.50 mmol), [Pd(OAc)<sub>2</sub>] (3 mg, 5 mol%) and Cu(OAc)<sub>2</sub>·H<sub>2</sub>O (50 mg, 0.25 mmol) in xylene (3.0 mL) at 100 °C for 3 h under air to afford the title compound. The product was purified by flash column chromatography on silica gel (4% EtOAc in hexane); 60% yield (yellow solid, 80 mg); mp 182-184 °C. <sup>1</sup>H NMR (400 MHz, CDCl<sub>3</sub>) δ 7.55–7.52 (m, 2H), 7.46–7.40 (m, 3H), 7.25–7.23 (m, 3H), 7.03–6.84 (m, 12H), 6.78–6.70 (m, 2H), 6.62–6.59 (m, 1H), 6.55 (s, 1H), 5.16 (s, 1H), 4.23–4.02 (m, 2H), 1.49 (t, <i>J</i> = 7.2 Hz, 3H). <sup>13</sup>C NMR (100 MHz, CDCl<sub>3</sub>) δ 148.4, 148.0, 145.0, 142.2, 140.0, 139.9, 138.8, 135.3, 134.7, 134.0, 129.9, 129.8, 128.8, 128.4, 128.2, 128.1, 127.7, 127.4, 127.2, 127.0, 126.6, 126.1, 125.0, 123.7, 122.2, 120.3, 119.7, 117.6, 114.4, 114.0, 90.1, 87.6, 65.1, 64.9, 15.2, 14.9. HRMS Calcd (ESI) m/z for C<sub>38</sub>H<sub>30</sub>O<sub>3</sub>: [M-OH]<sup>+</sup> 517.2168, found: 517.2165.</p> |
|  <p style="text-align: center;"><b>3ga</b></p> | <p><b>7-fluoro-1,2,3,3a-tetraphenyl-3,3a-dihydrocyclopenta[b]chromen-3-ol (3ga):</b> Following the general procedure 2.2, the reaction was carried out by heating a mixture of 2-hydroxynitrostyrene <b>1g</b> (46 mg, 0.25 mmol), alkyne <b>2a</b> (89 mg, 0.50 mmol), [Pd(OAc)<sub>2</sub>] (3 mg, 5 mol%) and Cu(OAc)<sub>2</sub>·H<sub>2</sub>O (50 mg, 0.25 mmol) in xylene (3.0 mL) at 100 °C for 3 h under air to afford the title compound. The product was purified by flash column chromatography on silica gel (3% EtOAc in</p>                                                                                                                                                                                                                                                                                                                                                                                                                                                                                                                                                                                                                                                                                                                                      |

|                                                                                                                                  |                                                                                                                                                                                                                                                                                                                                                                                                                                                                                                                                                                                                                                                                                                                                                                                                                                                                                                                                                                                                                                                                                                                                                                                 |
|----------------------------------------------------------------------------------------------------------------------------------|---------------------------------------------------------------------------------------------------------------------------------------------------------------------------------------------------------------------------------------------------------------------------------------------------------------------------------------------------------------------------------------------------------------------------------------------------------------------------------------------------------------------------------------------------------------------------------------------------------------------------------------------------------------------------------------------------------------------------------------------------------------------------------------------------------------------------------------------------------------------------------------------------------------------------------------------------------------------------------------------------------------------------------------------------------------------------------------------------------------------------------------------------------------------------------|
|                                                                                                                                  | <p>hexane); 70% yield (yellow solid, 89 mg); mp 107-109 °C. <sup>1</sup>H NMR (500 MHz, CDCl<sub>3</sub>) δ 7.52–7.50 (m, 2H), 7.46–7.41 (m, 3H), 7.23–7.21 (m, 3H), 7.13–6.94 (m, 8H), 6.90–6.72 (m, 6H), 6.69–6.67 (m, 1H), 6.51 (s, 1H), 4.93 (s, 1H). <sup>13</sup>C NMR (100 MHz, CDCl<sub>3</sub>) δ 159.2 (d, <i>J</i> = 238 Hz), 148.9, 148.7, 146.1, 141.8, 139.5, 139.4, 134.4, 133.8, 129.8, 128.9, 128.6, 128.1, 127.7, 127.6, 127.5, 127.4, 127.2, 126.7, 126.4, 125.0 (d, <i>J</i> = 8 Hz), 118.3 (d, <i>J</i> = 8 Hz), 116.8, 114.9 (d, <i>J</i> = 24 Hz), 113.4 (d, <i>J</i> = 23 Hz), 90.0, 87.7. <sup>19</sup>F NMR (CDCl<sub>3</sub>, 376 MHz): –121.3. HRMS Calcd (ESI) <i>m/z</i> for C<sub>36</sub>H<sub>25</sub>FO<sub>2</sub>: [M–OH]<sup>+</sup> 491.1811, found: 491.1815.</p>                                                                                                                                                                                                                                                                                                                                                                        |
| 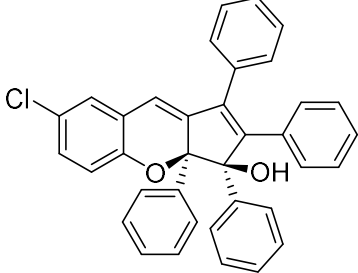 <p style="text-align: center;"><b>3ha</b></p> | <p><b>7-chloro-1,2,3,3a-tetraphenyl-3,3a-dihydrocyclopenta[<i>b</i>]chromen-3-ol (3ha):</b> Following the general procedure <b>2.2</b>, the reaction was carried out by heating a mixture of 2-hydroxynitrostyrene <b>1h</b> (50 mg, 0.25 mmol), alkyne <b>2a</b> (89 mg, 0.50 mmol), [Pd(OAc)<sub>2</sub>] (3 mg, 5 mol%) and Cu(OAc)<sub>2</sub>·H<sub>2</sub>O (50 mg, 0.25 mmol) in xylene (3.0 mL) at 100 °C for 3 h under air to afford the title compound. The product was purified by flash column chromatography on silica gel (3% EtOAc in hexane); 79% yield (pale yellow solid, 104 mg); mp 204-206 °C. <sup>1</sup>H NMR (400 MHz, CDCl<sub>3</sub>) δ 7.52–7.49 (m, 2H), 7.47–7.41 (m, 3H), 7.24–7.21 (m, 2H), 7.13–6.93 (m, 12H), 6.90–6.88 (m, 1H), 6.86–6.82 (m, 3H), 6.50 (s, 1H), 4.85 (s, 1H). <sup>13</sup>C NMR (100 MHz, CDCl<sub>3</sub>) δ 151.4, 148.9, 145.9, 141.9, 139.4, 134.4, 133.7, 129.8, 128.9, 128.6, 128.4, 128.1, 127.8, 127.7, 127.5, 127.4, 127.2, 126.9, 126.7, 126.4, 125.5, 118.9, 116.6, 90.0, 87.8. HRMS Calcd (ESI) <i>m/z</i> for C<sub>36</sub>H<sub>25</sub>ClO<sub>2</sub>: [M–OH]<sup>+</sup> 507.1516, found: 507.1514.</p> |

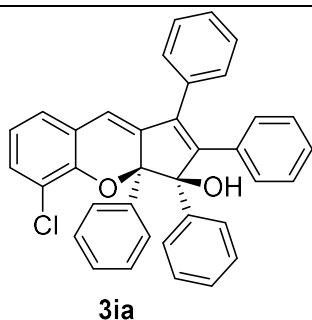

**5-chloro-1,2,3,3a-tetraphenyl-3,3a-dihydrocyclopenta[b]**

**chromen-3-ol (3ia):** Following the general procedure 2.2, the reaction was carried out by heating a mixture of 2-hydroxynitrostyrene **1i** (50 mg, 0.25 mmol), alkyne **2a** (89 mg, 0.50 mmol), [Pd(OAc)<sub>2</sub>] (3 mg, 5 mol%) and Cu(OAc)<sub>2</sub>·H<sub>2</sub>O (50 mg, 0.25 mmol) in xylene (3.0 mL) at 100 °C for 3 h under air to afford the title compound. The product was purified by flash column chromatography on silica gel (3% EtOAc in hexane); 69% yield (pale yellow solid, 91 mg); mp 173-175 °C. <sup>1</sup>H NMR (500 MHz, CDCl<sub>3</sub>) δ 7.51 (d, *J* = 7.1 Hz, 2H), 7.46–7.41 (m, 3H), 7.26–7.22 (m, 4H), 7.12–7.10 (m, 1H), 7.04–6.75 (m, 13H), 6.55 (s, 1H), 4.94 (s, 1H). <sup>13</sup>C NMR (100 MHz, CDCl<sub>3</sub>) δ 148.7, 145.5, 141.9, 139.5, 139.4, 134.4, 133.8, 129.8, 129.2, 128.9, 128.6, 128.1, 127.8, 127.7, 127.5, 127.3, 126.8, 126.4, 125.8, 125.6, 122.9, 116.9, 90.1, 88.4. HRMS Calcd (ESI) *m/z* for C<sub>36</sub>H<sub>25</sub>ClO<sub>2</sub>: [M–OH]<sup>+</sup> 507.1516, found: 507.1513.

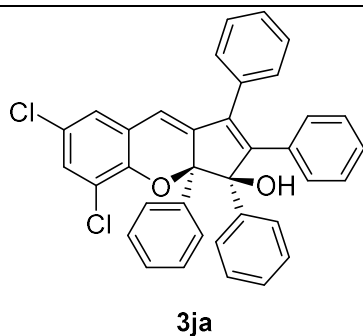

**5,7-dichloro-1,2,3,3a-tetraphenyl-3,3a-dihydrocyclopenta**

**[b]chromen-3-ol (3ja):** Following the general procedure 2.2, the reaction was carried out by heating a mixture of 2-hydroxynitrostyrene **1j** (58 mg, 0.25 mmol), alkyne **2a** (89 mg, 0.50 mmol), [Pd(OAc)<sub>2</sub>] (3 mg, 5 mol%) and Cu(OAc)<sub>2</sub>·H<sub>2</sub>O (50 mg, 0.25 mmol) in xylene (3.0 mL) at 100 °C for 3 h under air to afford the title compound. The product was purified by flash column chromatography on silica gel (3% EtOAc in hexane); 66% yield (yellow solid, 92 mg); mp 99-101 °C. <sup>1</sup>H NMR (500 MHz, CDCl<sub>3</sub>) δ 7.50–7.49 (m, 2H), 7.46–7.43 (m, 3H), 7.24–7.09 (m, 7H), 7.05–6.95 (m, 6H), 6.92–6.90 (m, 1H), 6.87–6.85 (m, 3H), 6.48 (s, 1H), 4.82 (s, 1H). <sup>13</sup>C NMR (100 MHz, CDCl<sub>3</sub>) δ 149.6, 147.3, 146.9, 141.7, 139.2, 138.9, 134.2, 133.5, 129.9, 129.8, 129.0, 128.7, 128.5, 128.0, 127.9, 127.8,



|                                                                                                                                   |                                                                                                                                                                                                                                                                                                                                                                                                                                                                                                                                                                                                                                                                                                                                                                                                                                                                                                                                                                                                                                                                  |
|-----------------------------------------------------------------------------------------------------------------------------------|------------------------------------------------------------------------------------------------------------------------------------------------------------------------------------------------------------------------------------------------------------------------------------------------------------------------------------------------------------------------------------------------------------------------------------------------------------------------------------------------------------------------------------------------------------------------------------------------------------------------------------------------------------------------------------------------------------------------------------------------------------------------------------------------------------------------------------------------------------------------------------------------------------------------------------------------------------------------------------------------------------------------------------------------------------------|
|                                                                                                                                   | 127.7, 127.3, 127.2, 126.8, 126.6, 126.5, 125.4, 123.4, 115.9, 90.0, 88.6. HRMS Calcd (ESI) m/z for C <sub>36</sub> H <sub>24</sub> Cl <sub>2</sub> O <sub>2</sub> : [M-OH] <sup>+</sup> 541.1126, found: 541.1125.                                                                                                                                                                                                                                                                                                                                                                                                                                                                                                                                                                                                                                                                                                                                                                                                                                              |
| 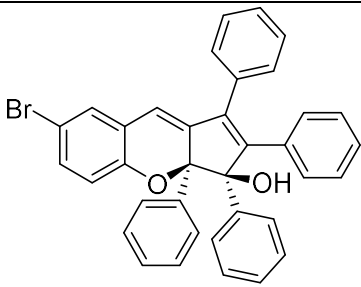 <p style="text-align: center;"><b>3ka</b></p>   | <p><b>7-bromo-1,2,3,3a-tetraphenyl-3,3a-dihydrocyclopenta[b]chromen-3-ol (3ka):</b> Following the general procedure 2.2, the reaction was carried out by heating a mixture of 2-hydroxynitrostyrene <b>1k</b> (61 mg, 0.25 mmol), alkyne <b>2a</b> (89 mg, 0.50 mmol), [Pd(OAc)<sub>2</sub>] (3 mg, 5 mol%) and Cu(OAc)<sub>2</sub>·H<sub>2</sub>O (50 mg, 0.25 mmol) in xylene (3.0 mL) at 100 °C for 3 h under air to afford the title compound. The product was purified by flash column chromatography on silica gel (3% EtOAc in hexane); 70% yield (yellow solid, 100 mg); mp 237-239 °C. <sup>1</sup>H NMR (400 MHz, CDCl<sub>3</sub>) δ 7.52–7.49 (m, 2H), 7.46–7.42 (m, 3H), 7.25–7.22 (m, 2H), 7.15–7.09 (m, 4H), 7.04–6.92 (m, 7H), 6.90 (d, <i>J</i> = 8.5 Hz, 2H), 6.86–6.83 (m, 3H), 6.50 (s, 1H), 4.85 (s, 1H). <sup>13</sup>C NMR (100 MHz, CDCl<sub>3</sub>) δ 151.9, 148.9, 145.9, 141.8, 139.4, 139.4, 134.4, 133.7, 131.3, 129.8, 128.9, 128.6, 128.1, 127.7, 127.6, 127.5, 127.2, 126.7, 126.4, 125.9, 119.4, 116.5, 114.8, 90.0, 87.8.</p> |
|  <p style="text-align: center;"><b>3la</b></p> | <p><b>5,7-dibromo-1,2,3,3a-tetraphenyl-3,3a-dihydrocyclopenta[b]chromen-3-ol (3la):</b> Following the general procedure 2.2, the reaction was carried out by heating a mixture of 2-hydroxynitrostyrene <b>1l</b> (80 mg, 0.25 mmol), alkyne <b>2a</b> (89 mg, 0.50 mmol), [Pd(OAc)<sub>2</sub>] (3 mg, 5 mol%) and Cu(OAc)<sub>2</sub>·H<sub>2</sub>O (50 mg, 0.25 mmol) in xylene (3.0 mL) at 100 °C for 3 h under air to afford the title compound. The product was purified by flash column chromatography on silica gel (3% EtOAc in hexane); 69% yield (yellow solid, 112 mg); mp 191-194 °C. <sup>1</sup>H NMR (400 MHz, CDCl<sub>3</sub>) δ 7.51–7.48 (m, 2H), 7.46–7.42 (m, 3H), 7.38 (d, <i>J</i> = 2.2 Hz, 1H), 7.24–7.17 (m, 5H), 7.05–6.97 (m, 7H), 6.91–6.89 (m, 1H), 6.87–6.83 (m, 3H), 6.47 (s, 1H),</p>                                                                                                                                                                                                                                         |

|                                                                                                                                   |                                                                                                                                                                                                                                                                                                                                                                                                                                                                                                                                                                                                                                                                                                                                                                                                                                                                                                                                                                                                                                                                                                                                                                    |
|-----------------------------------------------------------------------------------------------------------------------------------|--------------------------------------------------------------------------------------------------------------------------------------------------------------------------------------------------------------------------------------------------------------------------------------------------------------------------------------------------------------------------------------------------------------------------------------------------------------------------------------------------------------------------------------------------------------------------------------------------------------------------------------------------------------------------------------------------------------------------------------------------------------------------------------------------------------------------------------------------------------------------------------------------------------------------------------------------------------------------------------------------------------------------------------------------------------------------------------------------------------------------------------------------------------------|
|                                                                                                                                   | <p>4.83 (s, 1H). <sup>13</sup>C NMR (100 MHz, CDCl<sub>3</sub>) δ 149.6, 148.9, 146.7, 141.6, 139.2, 138.9, 134.2, 133.8, 133.5, 129.9, 129.8, 128.9, 128.7, 128.0, 127.9, 127.8, 127.7, 127.3, 127.0, 126.8, 126.5, 115.9, 114.8, 112.5, 90.1, 88.9. HRMS Calcd (ESI) m/z for C<sub>36</sub>H<sub>24</sub>Br<sub>2</sub>O<sub>2</sub>: [M–OH]<sup>+</sup> 629.0116, found: 629.0110.</p>                                                                                                                                                                                                                                                                                                                                                                                                                                                                                                                                                                                                                                                                                                                                                                          |
| 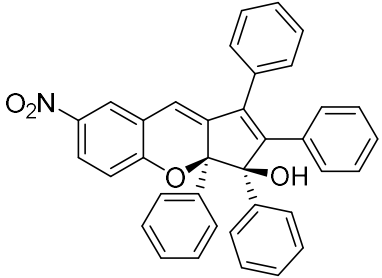 <p style="text-align: center;"><b>3ma</b></p>   | <p><b>7-nitro-1,2,3,3a-tetraphenyl-3,3a-dihydrocyclopenta[b]chromen-3-ol (3ma):</b> Following the general procedure <b>2.2</b>, the reaction was carried out by heating a mixture of 2-hydroxynitrostyrene <b>1m</b> (52 mg, 0.25 mmol), alkyne <b>2a</b> (89 mg, 0.50 mmol), [Pd(OAc)<sub>2</sub>] (3 mg, 5 mol%) and Cu(OAc)<sub>2</sub>·H<sub>2</sub>O (50 mg, 0.25 mmol) in xylene (3.0 mL) at 100 °C for 3 h under air to afford the title compound. The product was purified by flash column chromatography on silica gel (4% EtOAc in hexane); 85% yield (pale yellow solid, 114 mg); mp 210–221 °C. <sup>1</sup>H NMR (500 MHz, CDCl<sub>3</sub>) δ 7.90–7.88 (m, 1H), 7.80 (d, <i>J</i> = 2.85 Hz, 1H), 7.52–7.43 (m, 5H), 7.25–7.24 (m, 2H), 7.11–6.83 (m, 14H), 6.56 (s, 1H), 4.61 (s, 1H). <sup>13</sup>C NMR (100 MHz, CDCl<sub>3</sub>) δ 158.2, 149.6, 146.6, 142.8, 141.6, 139.1, 138.8, 134.0, 133.3, 129.8, 129.7, 129.0, 128.8, 128.0, 127.9, 127.8, 127.7, 127.4, 127.3, 126.8, 126.6, 124.4, 124.3, 122.7, 90.1, 88.7. HRMS Calcd (ESI) m/z for C<sub>36</sub>H<sub>25</sub>NO<sub>4</sub>: [M–OH]<sup>+</sup> 518.1756, found: 518.1753.</p> |
|  <p style="text-align: center;"><b>3na</b></p> | <p><b>7a,8,9,10-tetraphenyl-7a,8-dihydrobenzo[f]cyclopenta[b]chromen-8-ol (3na):</b> Following the general procedure <b>2.2</b>, the reaction was carried out by heating a mixture of 2-hydroxynitrostyrene <b>1n</b> (54 mg, 0.25 mmol), alkynes <b>2a</b> (89 mg, 0.50 mmol), [Pd(OAc)<sub>2</sub>] (3 mg, 5 mol%) and Cu(OAc)<sub>2</sub>·H<sub>2</sub>O (50 mg, 0.25 mmol) in xylene (3.0 mL) at 100 °C for 3 h under air to afford the title compound. The product was purified by flash column chromatography on silica gel (3% EtOAc in hexane); 74% yield (pale yellow solid,</p>                                                                                                                                                                                                                                                                                                                                                                                                                                                                                                                                                                          |

|                                                                                                                                |                                                                                                                                                                                                                                                                                                                                                                                                                                                                                                                                                                                                                                                                                                                                                                                                                                                                                                                                                                                                                                                                                                                                                                                                                                                                              |
|--------------------------------------------------------------------------------------------------------------------------------|------------------------------------------------------------------------------------------------------------------------------------------------------------------------------------------------------------------------------------------------------------------------------------------------------------------------------------------------------------------------------------------------------------------------------------------------------------------------------------------------------------------------------------------------------------------------------------------------------------------------------------------------------------------------------------------------------------------------------------------------------------------------------------------------------------------------------------------------------------------------------------------------------------------------------------------------------------------------------------------------------------------------------------------------------------------------------------------------------------------------------------------------------------------------------------------------------------------------------------------------------------------------------|
|                                                                                                                                | <p>99 mg); mp 240-243 °C. <sup>1</sup>H NMR (500 MHz, CDCl<sub>3</sub>) δ 7.87–7.82 (m, 1H), 7.75–7.57 (m, 5H), 7.51–7.37 (m, 4H), 7.29–7.18 (m, 7H), 7.02–6.84 (m, 10H), 5.06 (s, 1H). <sup>13</sup>C NMR (100 MHz, CDCl<sub>3</sub>) δ 151.1, 147.9, 143.8, 142.5, 139.9, 139.8, 134.7, 134.2, 130.3, 130.0, 129.9, 129.8, 129.3, 129.0, 128.6, 128.2, 127.7, 127.5, 127.4, 127.3, 127.1, 126.7, 126.6, 126.3, 124.3, 122.4, 121.8, 118.8, 117.7, 113.7, 90.4, 87.8. HRMS Calcd (ESI) m/z for C<sub>40</sub>H<sub>28</sub>O<sub>2</sub>: [M–OH]<sup>+</sup> 523.2062, found: 523.2061.</p>                                                                                                                                                                                                                                                                                                                                                                                                                                                                                                                                                                                                                                                                                 |
| 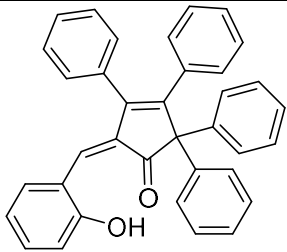 <p style="text-align: center;"><b>4a</b></p> | <p><b>5-(2-hydroxybenzylidene)-2,2,3,4-tetraphenylcyclopent-3-en-1-one (4a, <i>E:Z</i> = 1:3):</b> Following the general procedure <b>2.3</b>, the reaction was carried out by heating a mixture of chromene derivative <b>3aa</b> (49 mg, 0.1 mmol), In(OTf)<sub>3</sub> (6 mg, 10 mol%) in chlorobenzene (3.0 mL) at 50 °C for 2 h under air to afford the title compound. The product was purified by flash column chromatography on silica gel (6% EtOAc in hexane); 89% yield (sticky yellow solid, 43 mg). <sup>1</sup>H NMR (500 MHz, CDCl<sub>3</sub>) δ 7.53 (s, 0.25H), 7.46 (d, <i>J</i> = 7.4 Hz, 4H), 7.40 (d, <i>J</i> = 4.3 Hz, 2H), 7.37–7.35 (m, 1H), 7.30 (t, <i>J</i> = 7.5 Hz, 4H), 7.27–7.20 (m, 3H), 7.00–6.84 (m, 9H), 6.55 (d, <i>J</i> = 8.2 Hz, 0.25H), 6.44 (d, <i>J</i> = 7.6 Hz, 0.25H), 6.29 (t, <i>J</i> = 7.5 Hz, 0.25H). <sup>13</sup>C NMR (100 MHz, CDCl<sub>3</sub>) δ 208.5, 155.9, 145.6, 144.5, 140.1, 139.8, 136.8, 134.9, 134.8, 133.4, 132.8, 131.7, 130.7, 130.5, 130.2, 129.9, 129.8, 129.7, 128.9, 128.4, 128.3, 128.2, 127.7, 127.5, 127.4, 127.4, 127.3, 124.5, 121.5, 120.8, 119.5, 119.3, 115.0, 71.4. HRMS Calcd (ESI) m/z for C<sub>36</sub>H<sub>26</sub>O<sub>2</sub>: [M+H]<sup>+</sup> 491.2011, found: 491.2010.</p> |

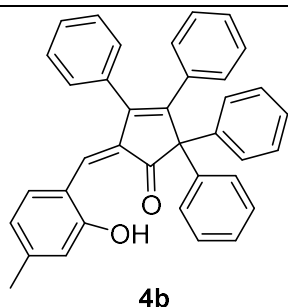

**5-(2-hydroxy-4-methylbenzylidene)-2,2,3,4-**

**tetraphenylcyclopent-3-en-1-one (4b, *E:Z* = 1:4):** Following the general procedure **2.3**, the reaction was carried out by heating a mixture of chromene derivative **3ca** (50 mg, 0.1 mmol), In(OTf)<sub>3</sub> (6 mg, 10 mol%) in chlorobenzene (3.0 mL) at 50 °C for 2 h under air to afford the title compound. The product was purified by flash column chromatography on silica gel (6% EtOAc in hexane); 85% yield (yellow solid, 43 mg); mp 120-125 °C. <sup>1</sup>H NMR (500 MHz, CDCl<sub>3</sub>) δ 7.51 (s, 1H), 7.48 (s, 0.25H), 7.45–7.43 (m, 3H), 7.39–7.37 (m, 3H), 7.35–7.33 (m, 1H), 7.30–7.24 (m, 8H), 7.20 (d, *J* = 8.0 Hz, 1H), 6.99–6.91 (m, 3H), 6.87–6.84 (m, 2H), 6.79 (s, 1H), 6.68 (d, *J* = 8.9 Hz, 1H), 6.37 (s, 0.25H), 6.31 (d, *J* = 7.9 Hz, 0.25H), 6.31 (d, *J* = 7.4 Hz, 0.25H), 2.28 (s, 2.25H), 2.12 (s, 0.75H). <sup>13</sup>C NMR (100 MHz, CDCl<sub>3</sub>) δ 208.5, 155.9, 145.9, 145.8, 143.8, 142.8, 140.2, 140.0, 139.9, 135.8, 135.1, 134.9, 134.8, 133.4, 133.2, 130.7, 130.4, 130.4, 130.2, 130.2, 129.9, 129.8, 129.7, 128.9, 128.4, 128.3, 128.2, 128.1, 127.7, 127.5, 127.4, 127.3, 127.2, 121.8, 121.6, 119.9, 119.7, 119.5, 118.6, 115.6, 71.4, 71.3, 21.4. HRMS Calcd (ESI) *m/z* for C<sub>37</sub>H<sub>28</sub>O<sub>2</sub>: [M+H]<sup>+</sup> 505.2168, found: 505.2166.

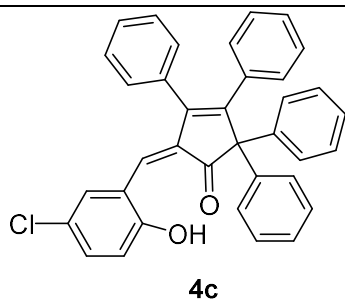

**5-(5-chloro-2-hydroxybenzylidene)-2,2,3,4-**

**tetraphenylcyclopent-3-en-1-one (4c, *E:Z* = 1:1.5):** Following the general procedure **2.3**, the reaction was carried out by heating a mixture of chromen derivatives **3ha** (53 mg, 0.1 mmol), In(OTf)<sub>3</sub> (6 mg, 10 mol%) in chlorobenzene (3.0 mL) at 50 °C for 2 h under air to afford the title compound. The product was purified by flash column chromatography on silica gel (6% EtOAc in hexane); 76% yield (yellow solid, 40 mg); mp 159-161 °C. <sup>1</sup>H NMR (500 MHz, CDCl<sub>3</sub>) δ 7.51 (d, *J* = 6.4, 0.40H), 7.44–7.42 (m, 3H), 7.39–7.36 (m, 3H), 7.30–7.26 (m,

|                                                                                                                                 |                                                                                                                                                                                                                                                                                                                                                                                                                                                                                                                                                                                                                                                                                                                                                                                                                                                                                                                                                                                                                                                                                                                                                                                                                                                               |
|---------------------------------------------------------------------------------------------------------------------------------|---------------------------------------------------------------------------------------------------------------------------------------------------------------------------------------------------------------------------------------------------------------------------------------------------------------------------------------------------------------------------------------------------------------------------------------------------------------------------------------------------------------------------------------------------------------------------------------------------------------------------------------------------------------------------------------------------------------------------------------------------------------------------------------------------------------------------------------------------------------------------------------------------------------------------------------------------------------------------------------------------------------------------------------------------------------------------------------------------------------------------------------------------------------------------------------------------------------------------------------------------------------|
|                                                                                                                                 | <p>7H), 7.20–6.83 (m, 9H), 6.73 (s, 0.60H), 6.52–6.49 (m, 0.60H), 6.36 (s, 0.40H). <sup>13</sup>C NMR (100 MHz, CDCl<sub>3</sub>) δ 208.6, 205.1, 154.4, 152.7, 149.4, 145.4, 145.3, 139.9, 139.5, 138.0, 137.6, 134.6, 134.5, 132.2, 131.1, 130.8, 130.5, 130.4, 130.1, 129.8, 129.7, 129.5, 129.4, 129.1, 128.7, 128.6, 128.5, 128.4, 128.1, 127.8, 127.7, 127.6, 127.5, 127.4, 127.0, 126.2, 125.9, 125.6, 124.3, 123.6, 122.8, 120.9, 116.2, 114.9, 71.5, 71.4. HRMS Calcd (ESI) m/z for C<sub>36</sub>H<sub>25</sub>ClO<sub>2</sub>: [M+H]<sup>+</sup> 525.1621, found: 525.1619.</p>                                                                                                                                                                                                                                                                                                                                                                                                                                                                                                                                                                                                                                                                    |
| 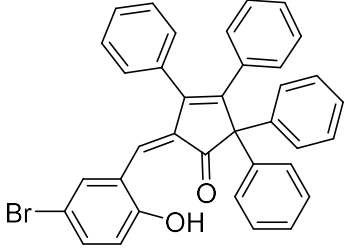 <p style="text-align: center;"><b>4d</b></p> | <p><b>5-(5-bromo-2-hydroxybenzylidene)-2,2,3,4-tetraphenylcyclopent-3-en-1-one (4d, <i>E:Z</i> = 1:3):</b> Following the general procedure <b>2.3</b>, the reaction was carried out by heating a mixture of chromene derivative <b>3ka</b> (56 mg, 0.1 mmol), In(OTf)<sub>3</sub> (6 mg, 10 mol%) in chlorobenzene (3.0 mL) at 50 °C for 2 h under air to afford the title compound. The product was purified by flash column chromatography on silica gel (6% EtOAc in hexane); 75% yield (yellow solid, 43 mg); mp 160-163 °C. <sup>1</sup>H NMR (500 MHz, CDCl<sub>3</sub>) δ 7.53 (s, 0.25H), 7.47–7.43 (m, 5H), 7.40–7.33 (m, 3H), 7.31–7.28 (m, 4H), 7.25 (d, <i>J</i> = 7.1 Hz, 3H), 7.08–6.93 (m, 4H), 6.92–6.84 (m, 3H), 6.78–6.76 (m, 1H), 6.46–6.43 (m, 0.75H). <sup>13</sup>C NMR (100 MHz, CDCl<sub>3</sub>) δ 208.5, 205.4, 154.8, 153.4, 149.3, 145.4, 145.3, 141.9, 139.9, 139.5, 138.0, 137.3, 135.1, 134.7, 134.6, 134.5, 133.9, 133.7, 132.5, 130.7, 130.6, 130.5, 130.1, 129.8, 129.4, 129.1, 128.5, 128.4, 128.2, 128.0, 127.9, 127.7, 127.6, 127.5, 127.4, 126.4, 123.3, 121.1, 116.6, 112.8, 111.4, 71.5, 71.4. HRMS Calcd (ESI) m/z for C<sub>36</sub>H<sub>25</sub>BrO<sub>2</sub>: [M+H]<sup>+</sup> 569.1116, found: 569.1111.</p> |

|                                                                                                                                  |                                                                                                                                                                                                                                                                                                                                                                                                                                                                                                                                                                                                                                                                                                                                                                                                                                                                                                                                                                                                                                                                                                                                                                                                                                                                                              |
|----------------------------------------------------------------------------------------------------------------------------------|----------------------------------------------------------------------------------------------------------------------------------------------------------------------------------------------------------------------------------------------------------------------------------------------------------------------------------------------------------------------------------------------------------------------------------------------------------------------------------------------------------------------------------------------------------------------------------------------------------------------------------------------------------------------------------------------------------------------------------------------------------------------------------------------------------------------------------------------------------------------------------------------------------------------------------------------------------------------------------------------------------------------------------------------------------------------------------------------------------------------------------------------------------------------------------------------------------------------------------------------------------------------------------------------|
| 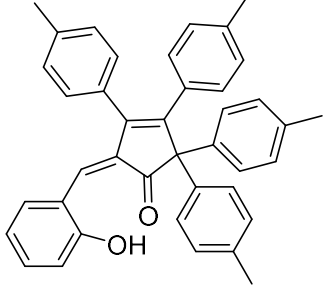 <p style="text-align: center;"><b>4e</b></p>   | <p><b>5-(2-hydroxybenzylidene)-2,2,3,4-tetra-<i>p</i>-tolylcyclopent-3-en-1-one (4e, <i>E:Z</i> = 1:4):</b> Following the general procedure 2.3, the reaction was carried out by heating a mixture of chromene derivative <b>3ab</b> (55 mg, 0.1 mmol), In(OTf)<sub>3</sub> (6 mg, 10 mol%) in chlorobenzene (3.0 mL) at 50 °C for 2 h under air to afford the title compound. The product was purified by flash column chromatography on silica gel (6% EtOAc in hexane); 69% yield (sticky yellow solid, 38 mg). <sup>1</sup>H NMR (500 MHz, CDCl<sub>3</sub>) δ 7.57 (s, 0.8H), 7.42–7.38 (m, 0.40H), 7.33 (d, <i>J</i> = 7.9 Hz, 3H), 7.28–7.20 (m, 5.2H), 7.12–7.08 (m, 4H), 6.95 (d, <i>J</i> = 8.3 Hz, 1H), 6.85–6.71 (m, 7H), 6.52 (d, <i>J</i> = 8.2 Hz, 0.20H), 6.43 (d, <i>J</i> = 7.7 Hz, 0.20H), 6.30 (t, <i>J</i> = 7.6 Hz, 0.20H) 2.39 (s, 3H), 2.31 (s, 6H), 2.14 (s, 3H). <sup>13</sup>C NMR (100 MHz, CDCl<sub>3</sub>) δ 209.7, 156.0, 144.8, 144.2, 137.9, 137.3, 137.1, 136.9, 133.6, 132.3, 132.2, 131.8, 131.4, 131.3, 130.8, 130.4, 130.0, 129.8, 129.7, 129.1, 129.0, 128.3, 128.2, 128.1, 125.1, 120.8, 120.0, 70.6, 21.5, 21.3, 21.2. HRMS Calcd (ESI) <i>m/z</i> for C<sub>40</sub>H<sub>34</sub>O<sub>2</sub>: [M+H]<sup>+</sup> 547.2637, found: 547.2623.</p> |
|  <p style="text-align: center;"><b>4f</b></p> | <p><b>2,2,3,4-tetrakis(4-fluorophenyl)-5-(2-hydroxybenzylidene)cyclopent-3-en-1-one (4f, <i>E:Z</i> = 1:2):</b> Following the general procedure 2.3, the reaction was carried out by heating a mixture of chromene derivative <b>3ad</b> (56 mg, 0.1 mmol), In(OTf)<sub>3</sub> (6 mg, 10 mol%) in chlorobenzene (3.0 mL) at 50 °C for 2 h under air to afford the title compound. The product was purified by flash column chromatography on silica gel (6% EtOAc in hexane); 86% yield (sticky yellow solid, 48 mg). <sup>1</sup>H NMR (500 MHz, CDCl<sub>3</sub>) δ 7.60–7.56 (m, 0.35H), 7.51–7.44 (m, 0.7H), 7.36–7.33 (m, 4.2H), 7.24–7.21 (m, 0.7H), 7.13–7.08 (m, 1H), 7.03–6.84 (m, 8H), 6.84–6.61 (m, 5H), 6.57 (d, <i>J</i> = 8.2 Hz, 0.35H), 6.43–6.34 (m, 0.7H). <sup>13</sup>C NMR (100 MHz, CDCl<sub>3</sub>) δ 206.9, 162.6 (d, <i>J</i> = 247 Hz), 162.2</p>                                                                                                                                                                                                                                                                                                                                                                                                                |

|                                                                                                                                  |                                                                                                                                                                                                                                                                                                                                                                                                                                                                                                                                                                                                                                                                                                                                                                                                                                                                                                                                                                                                                                                                                                                                                                                                                                         |
|----------------------------------------------------------------------------------------------------------------------------------|-----------------------------------------------------------------------------------------------------------------------------------------------------------------------------------------------------------------------------------------------------------------------------------------------------------------------------------------------------------------------------------------------------------------------------------------------------------------------------------------------------------------------------------------------------------------------------------------------------------------------------------------------------------------------------------------------------------------------------------------------------------------------------------------------------------------------------------------------------------------------------------------------------------------------------------------------------------------------------------------------------------------------------------------------------------------------------------------------------------------------------------------------------------------------------------------------------------------------------------------|
|                                                                                                                                  | <p>(d, <math>J = 246</math> Hz), 162.1 (d, <math>J = 246</math> Hz), 159.0 (d, <math>J = 246</math> Hz), 155.7, 145.0, 143.2, 141.6, 135.9, 135.5, 135.3, 133.3, 133.2, 132.9, 132.3, 132.2, 132.1, 132.0, 131.9, 131.7, 131.3, 131.2, 131.0, 130.4, 130.1, 127.8, 123.7, 121.2, 120.9, 119.5, 118.8, 116.4, 116.2, 115.6 (d, <math>J = 21</math> Hz), 115.5 (d, <math>J = 21</math> Hz), 115.0 (d, <math>J = 21</math> Hz), 114.9 (d, <math>J = 21</math> Hz), 70.1. HRMS Calcd (ESI) <math>m/z</math> for <math>C_{36}H_{22}F_4O_2</math>: <math>[M+H]^+</math> 563.1634, found: 563.1630.</p>                                                                                                                                                                                                                                                                                                                                                                                                                                                                                                                                                                                                                                        |
| 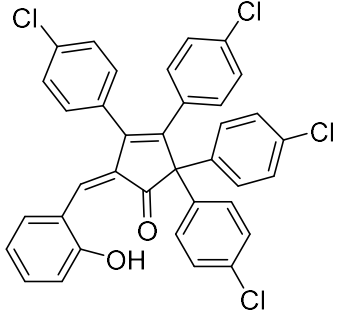 <p style="text-align: center;"><b>4g</b></p>   | <p><b>2,2,3,4-tetrakis(4-chlorophenyl)-5-(2-hydroxybenzylidene)cyclopent-3-en-1-one (4g, <math>E:Z = 1:2.3</math>):</b> Following the general procedure <b>2.3</b>, the reaction was carried out by heating a mixture of chromene derivative <b>3af</b> (63 mg, 0.1 mmol), <math>In(OTf)_3</math> (6 mg, 10 mol%) in chlorobenzene (3.0 mL) at 50 °C for 2 h under air to afford the title compound. The product was purified by flash column chromatography on silica gel (6% EtOAc in hexane); 79% yield (sticky yellow solid, 50 mg). <math>^1H</math> NMR (500 MHz, <math>CDCl_3</math>) <math>\delta</math> 7.55 (s, 0.30H), 7.49 (d, <math>J = 7.8</math> Hz, 0.60H), 7.39–7.09 (m, 12H), 7.00–6.83 (m, 5.2H), 6.74–6.69 (m, 2H), 6.57–6.53 (m, 0.30H), 6.39–6.32 (m, 0.60H). <math>^{13}C</math> NMR (100 MHz, <math>CDCl_3</math>) <math>\delta</math> 205.8, 155.7, 153.8, 145.5, 142.5, 137.9, 137.8, 135.6, 134.6, 133.9, 133.8, 133.6, 133.1, 132.7, 132.6, 132.3, 131.7, 131.4, 130.9, 130.8, 130.5, 129.8, 129.6, 128.9, 128.3, 128.2, 128.1, 123.5, 121.2, 120.9, 119.6, 118.5, 115.1, 70.3. HRMS Calcd (ESI) <math>m/z</math> for <math>C_{36}H_{22}Cl_4O_2</math>: <math>[M+H]^+</math> 627.0452, found: 627.0449.</p> |
|  <p style="text-align: center;"><b>4h</b></p> | <p><b>2-((5-hydroxy-2,3,4-tetraphenylcyclopent-2-en-1-yl)methyl)phenol (4h):</b> The reaction was carried out by reacting <b>4b</b> (50 mg, 0.1 mmol) with <math>NaBH_4</math> (6 mg, 1.5 equiv.) and cerium(III)chloride (5 mg, 20 mol%) in methanol (3.0 mL) at room temperature for 4 hours under air. The product was purified by silica gel flash column chromatography (10% EtOAc in hexane); 90% yield (yellow liquid, 46 mg). <math>^1H</math> NMR</p>                                                                                                                                                                                                                                                                                                                                                                                                                                                                                                                                                                                                                                                                                                                                                                          |

|  |                                                                                                                                                                                                                                                                                                                                                                                                                                                                                                                                                                                                                                                                  |
|--|------------------------------------------------------------------------------------------------------------------------------------------------------------------------------------------------------------------------------------------------------------------------------------------------------------------------------------------------------------------------------------------------------------------------------------------------------------------------------------------------------------------------------------------------------------------------------------------------------------------------------------------------------------------|
|  | <p>(400 MHz, CDCl<sub>3</sub>) δ 7.53–7.50 (m, 2H), 7.38–7.27 (m, 10H), 7.24–7.17 (m, 3H), 6.94–6.84 (m, 5H), 6.62–6.52 (m, 3H), 4.98 (d, <i>J</i> = 6.0 Hz, 1H), 3.40–3.35 (m, 1H), 2.73 (dd, <i>J</i> = 14.5, 10.2 Hz, 1H), 2.39 (dd, <i>J</i> = 14.5, 3.1 Hz, 1H), 2.22 (s, 3H). <sup>13</sup>C NMR (100 MHz, CDCl<sub>3</sub>) δ 154.5, 143.9, 142.2, 141.7, 139.8, 137.7, 137.2, 136.2, 131.4, 130.7, 129.8, 129.7, 128.5, 128.1, 127.9, 127.6, 127.5, 127.4, 126.8, 126.5, 124.4, 121.3, 117.6, 80.3, 69.2, 54.7, 27.5, 21.1. HRMS Calcd (ESI) <i>m/z</i> for C<sub>37</sub>H<sub>32</sub>O<sub>2</sub>: [M–OH]<sup>+</sup> 491.2375, found: 491.2372.</p> |
|--|------------------------------------------------------------------------------------------------------------------------------------------------------------------------------------------------------------------------------------------------------------------------------------------------------------------------------------------------------------------------------------------------------------------------------------------------------------------------------------------------------------------------------------------------------------------------------------------------------------------------------------------------------------------|

## 5. NMR Spectra and HRMS of Synthesized Compounds:

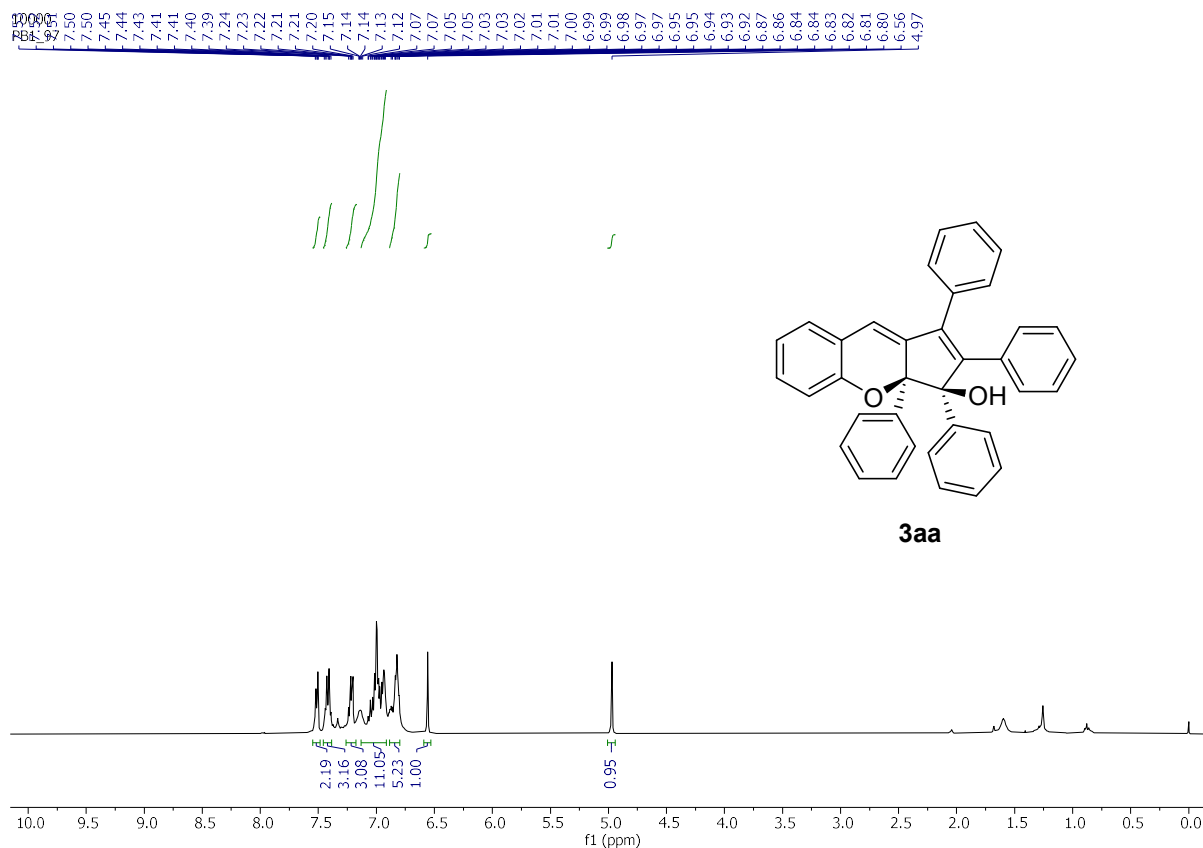



10030  
PB1\_97

152.91  
148.01  
144.55  
142.15  
139.89  
139.73  
134.65  
134.01  
129.89  
129.81  
128.85  
128.82  
128.46  
128.16  
127.70  
127.56  
127.49  
127.45  
127.26  
127.13  
126.63  
126.27  
124.02  
122.59  
117.74  
90.11  
87.55  
77.48  
77.16  
76.84

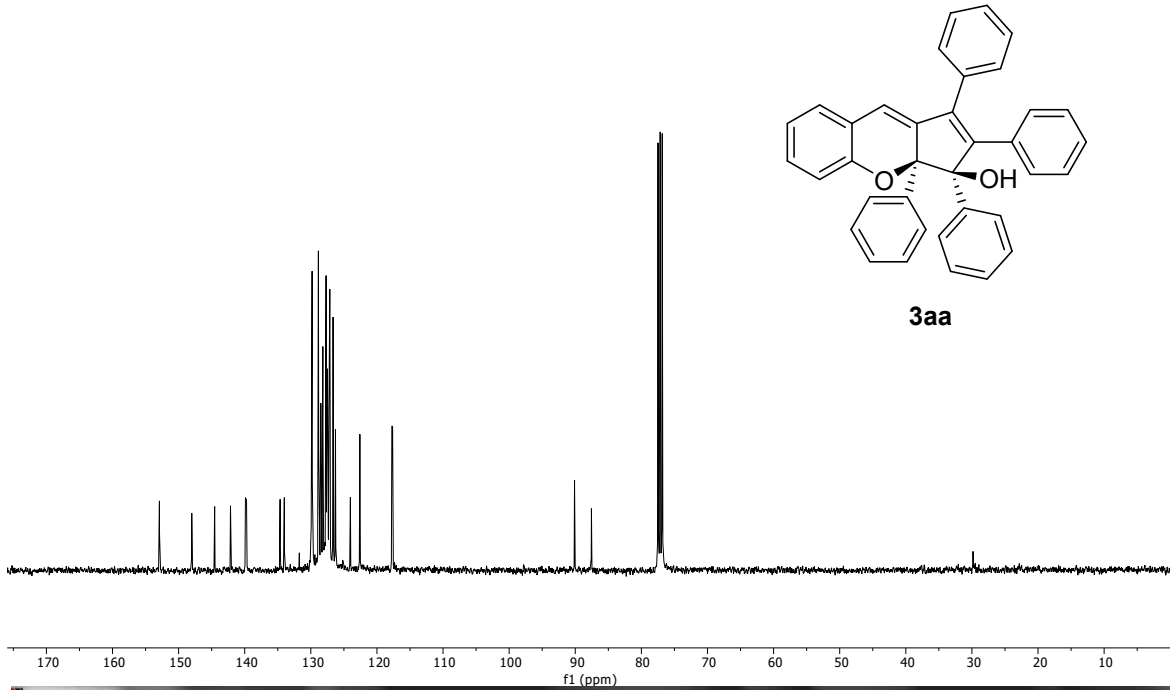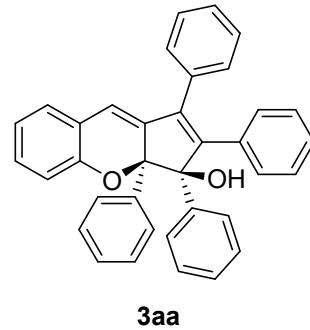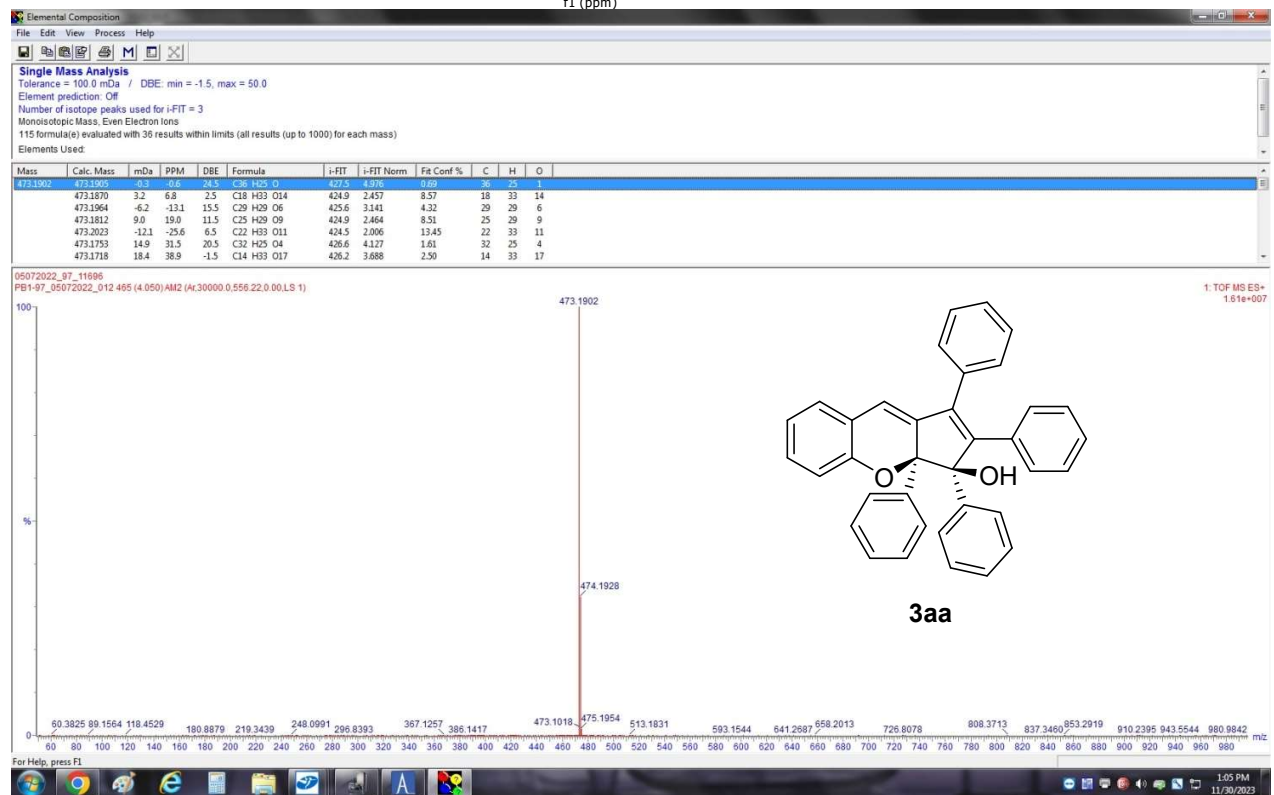

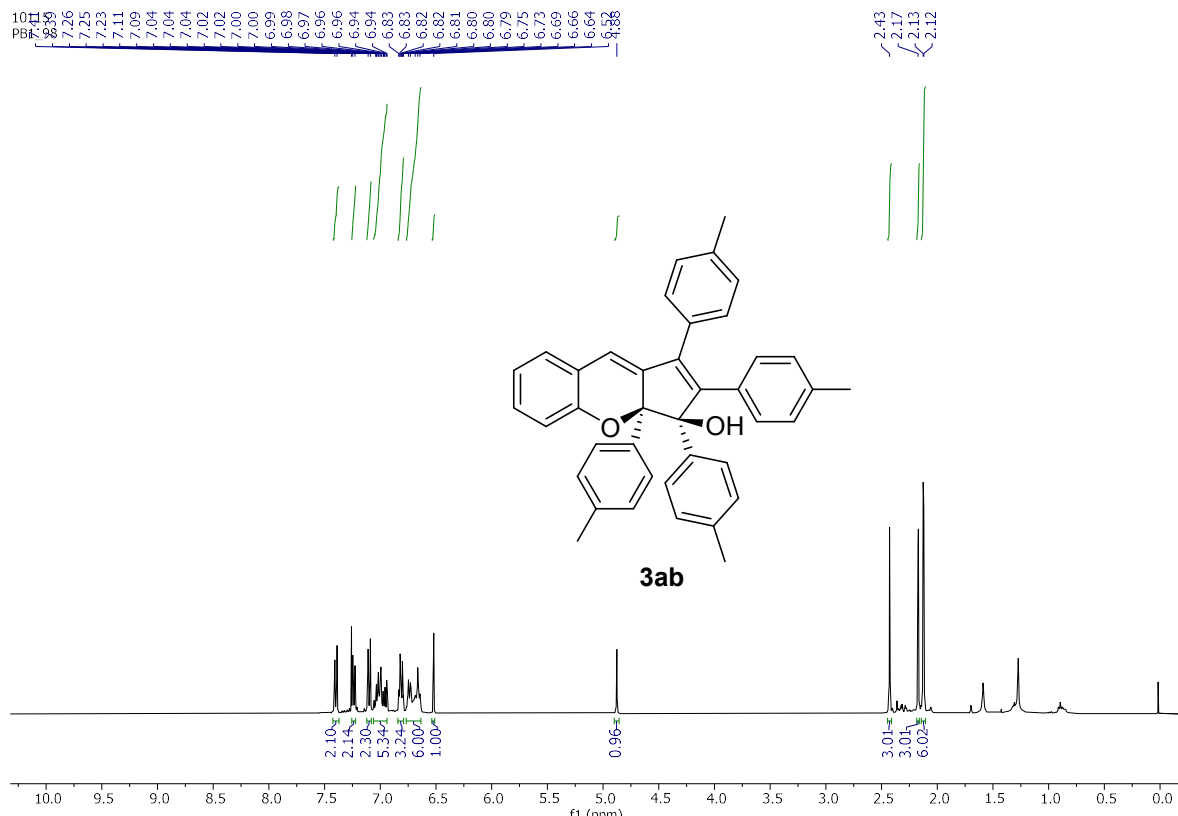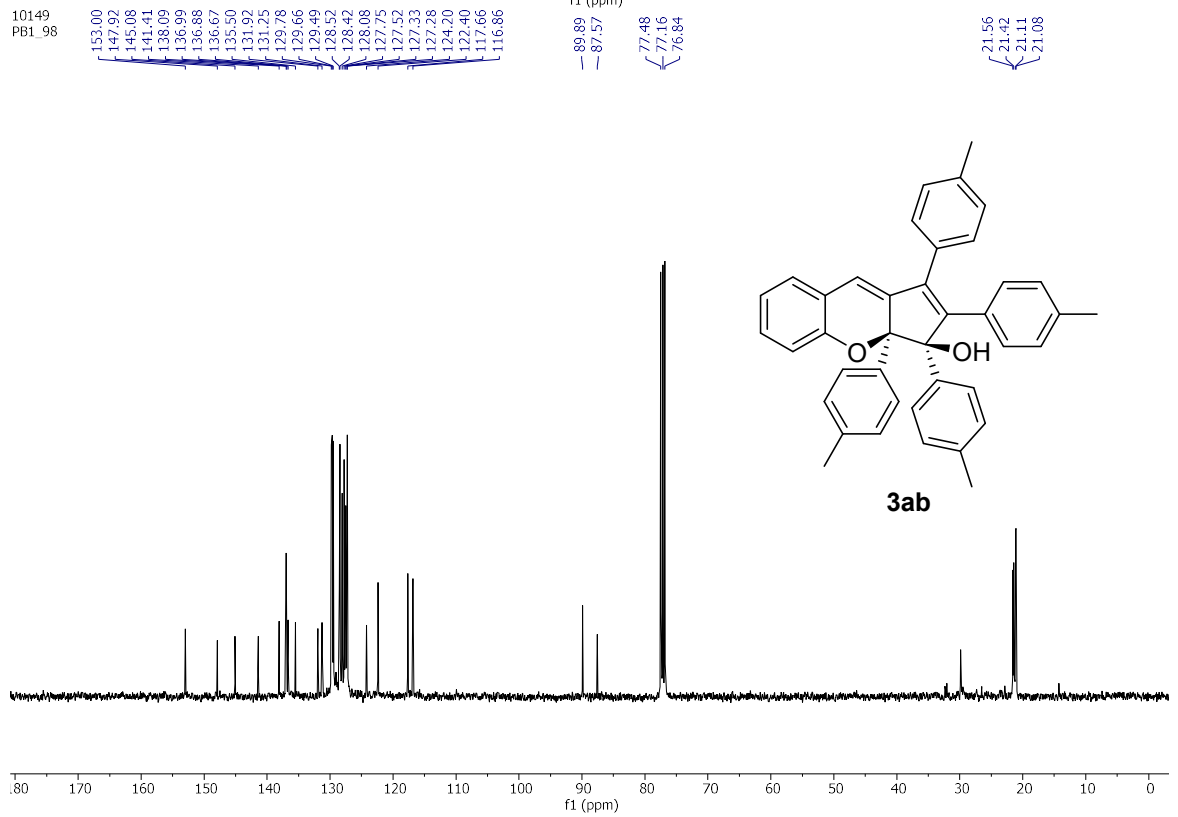

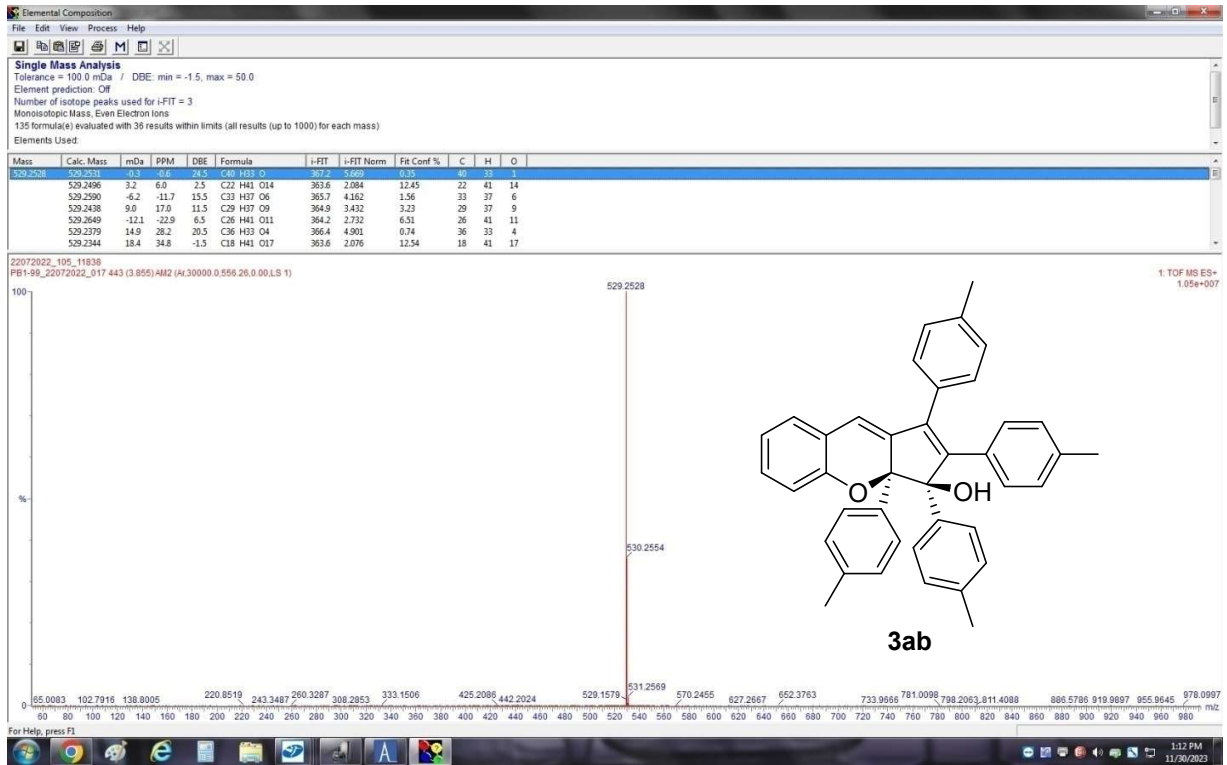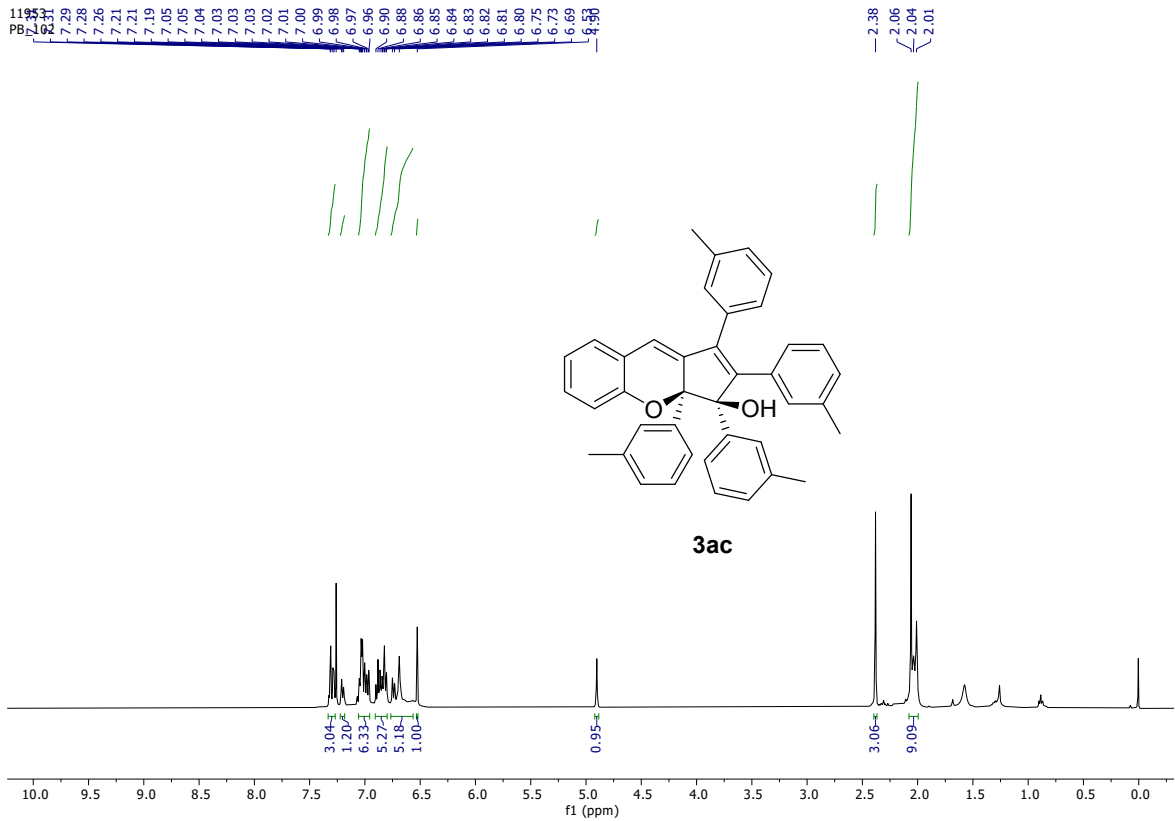

12073  
DK\_102

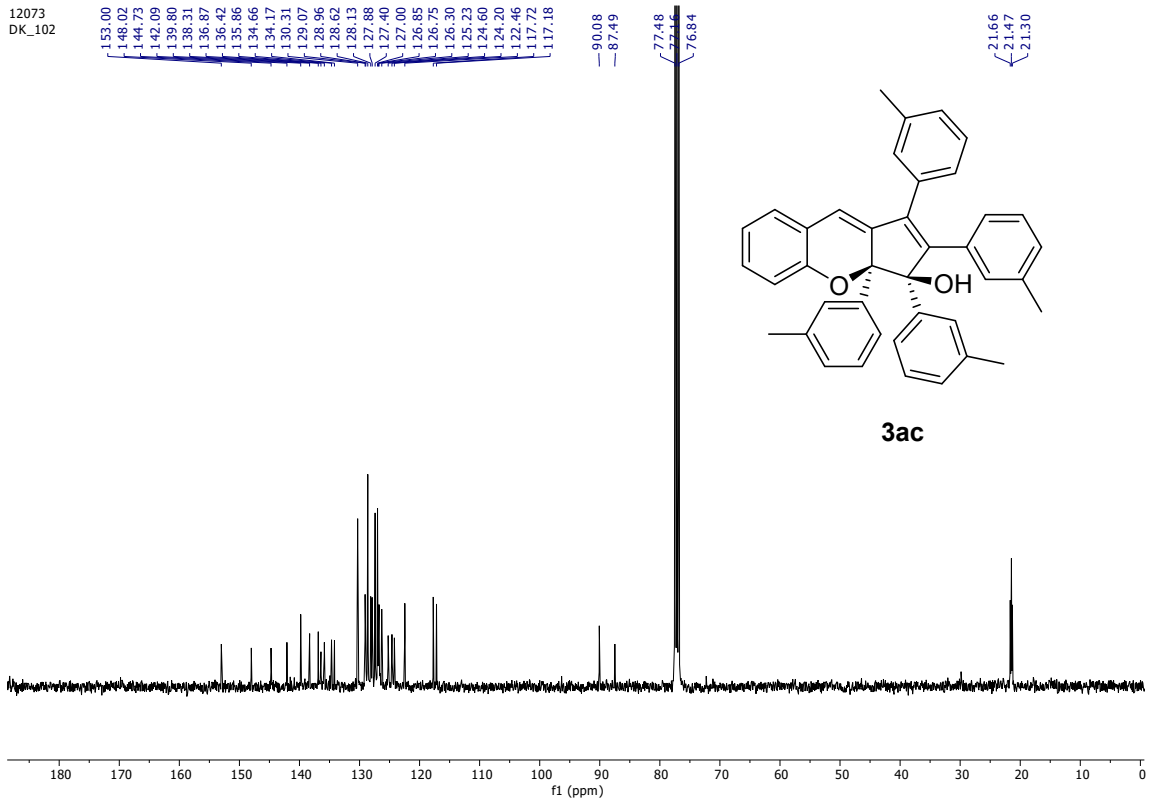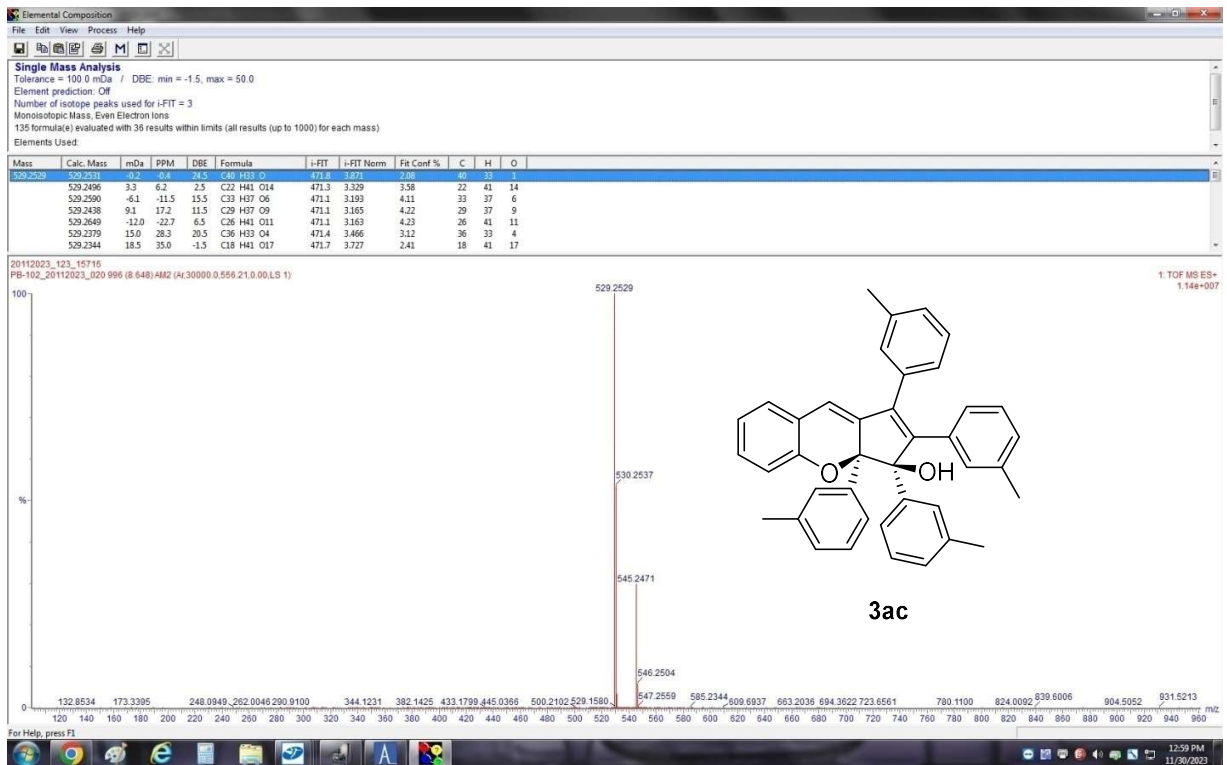

161.46  
159.45  
149.45  
143.26  
141.17  
137.17  
136.16  
135.15  
131.14  
131.12  
131.10  
130.09  
129.09  
128.07  
127.07  
126.01  
125.01  
124.01  
123.00  
122.99  
121.99  
120.98  
119.98  
118.88  
117.88  
116.87  
115.87  
114.75  
113.73  
112.70  
111.67  
110.59  
109.56

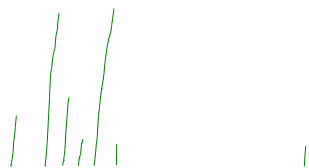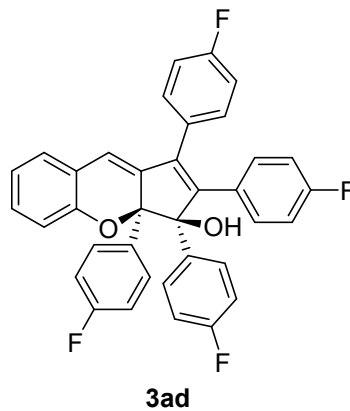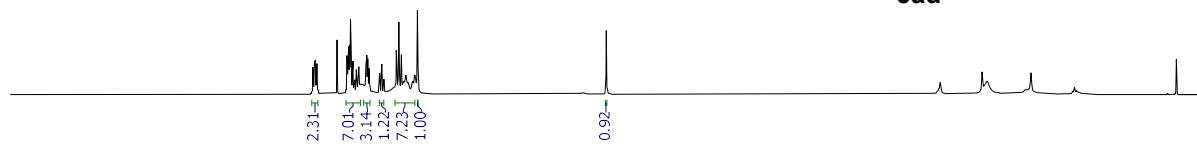

10151  
PB1\_99

164.11  
163.38  
163.32  
162.82  
161.63  
160.91  
160.86  
160.37  
152.56  
146.91  
143.67  
140.88  
135.36  
135.32  
135.28  
131.64  
131.56  
131.49  
130.23  
130.19  
129.83  
129.75  
129.44  
128.41  
128.25  
129.15  
127.65  
123.72  
122.97  
118.04  
117.75  
116.34  
116.12  
115.25  
115.04  
114.50  
114.28  
113.97  
113.76  
89.57  
86.84  
77.48  
77.16  
76.84

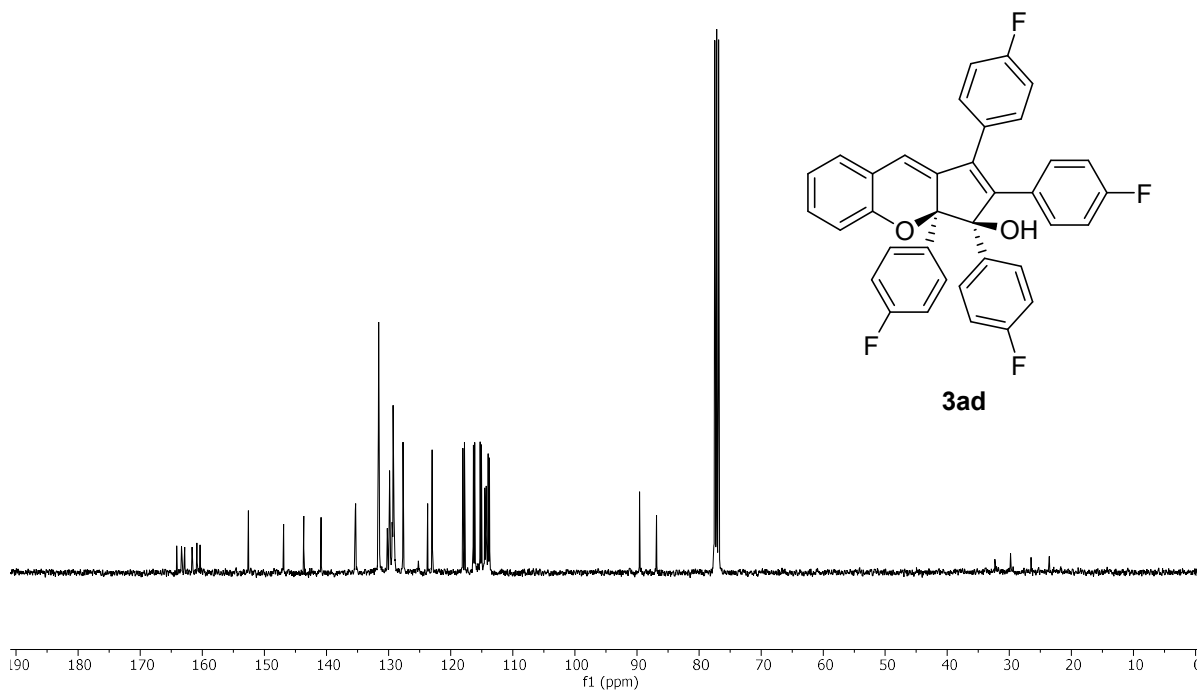

12606  
TG\_99

-111.89  
-112.65  
-114.10  
-115.74

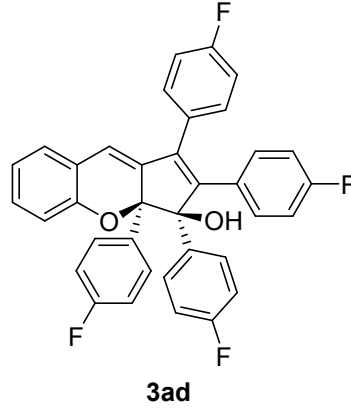

55 -60 -65 -70 -75 -80 -85 -90 -95 -100 -105 -110 -115 -120 -125 -130 -135 -140 -145 -150 -155 -160 -165 -170 -175 -180 -185 -190 -195 -200 -205  
f1 (ppm)

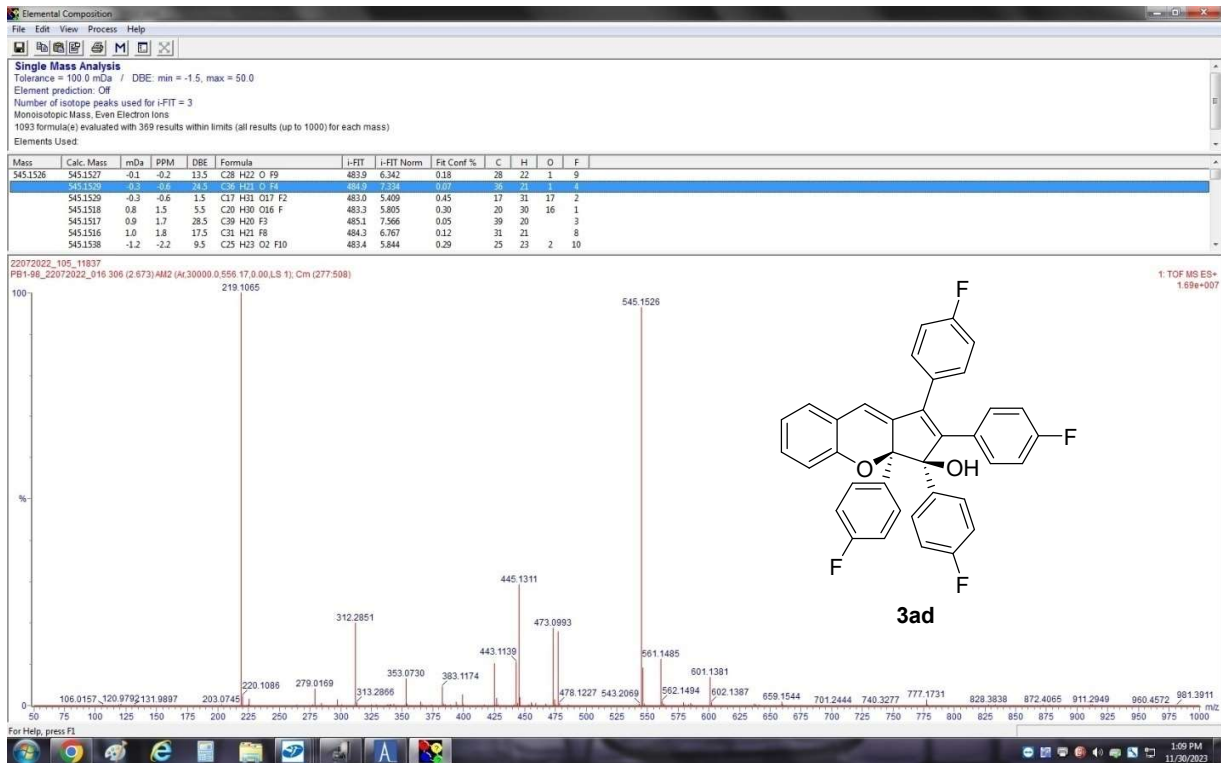

419.28  
412.25  
7.17  
7.17  
7.08  
7.07  
7.05  
6.97  
6.95  
6.94  
6.94  
6.77  
6.77  
6.76  
6.75  
6.63  
6.62  
6.60  
6.60  
6.59  
6.59  
6.58  
6.54  
6.53  
6.52  
6.51  
6.50  
6.50  
6.49  
6.49  
6.38  
JP-460

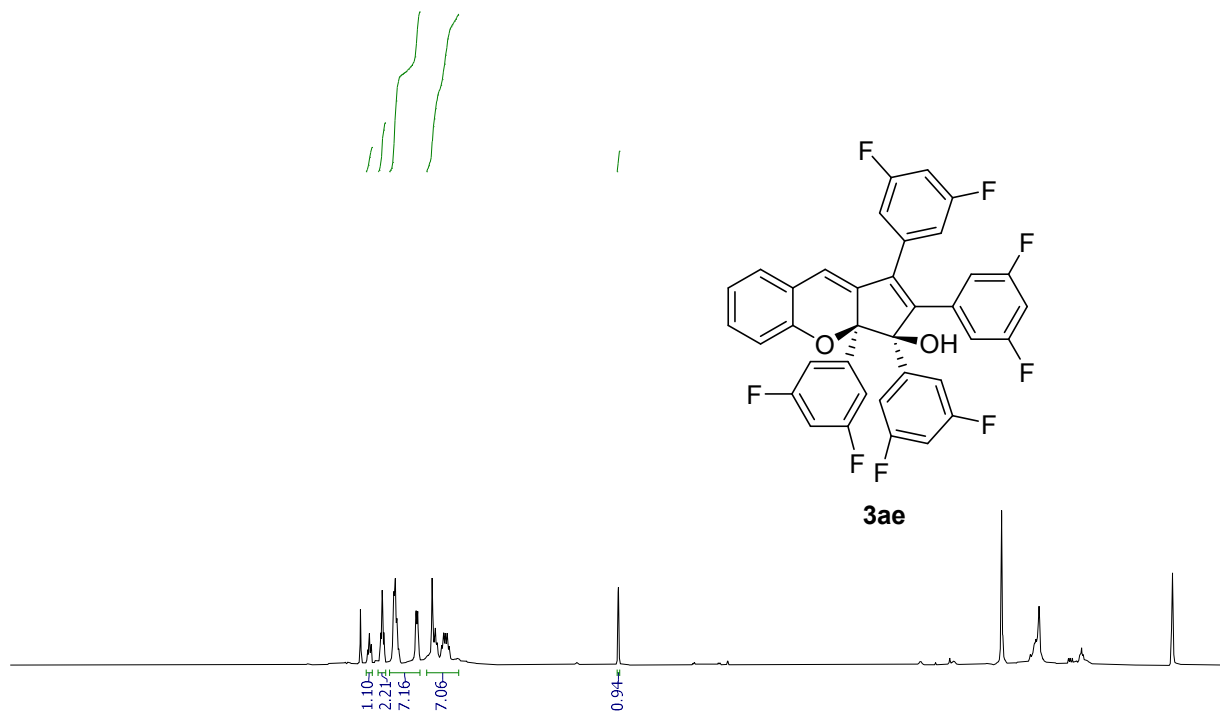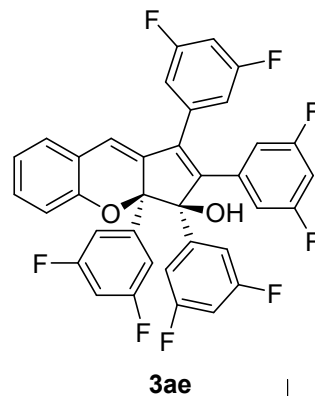

12687  
PB\_460

164.88  
164.76  
164.02  
163.89  
162.39  
162.26  
161.55  
161.41  
161.19  
152.15  
145.55  
143.15  
143.08  
141.66  
140.78  
136.27  
135.54  
130.37  
128.27  
123.65  
122.84  
120.25  
117.91  
112.71  
112.64  
112.45  
112.35  
112.09  
111.07  
110.86  
110.56  
110.30  
105.43  
105.18  
104.93  
104.57  
104.31  
104.17  
104.06  
103.91  
103.66  
103.30  
103.05  
102.80  
89.40  
86.14  
77.48  
77.16  
76.84

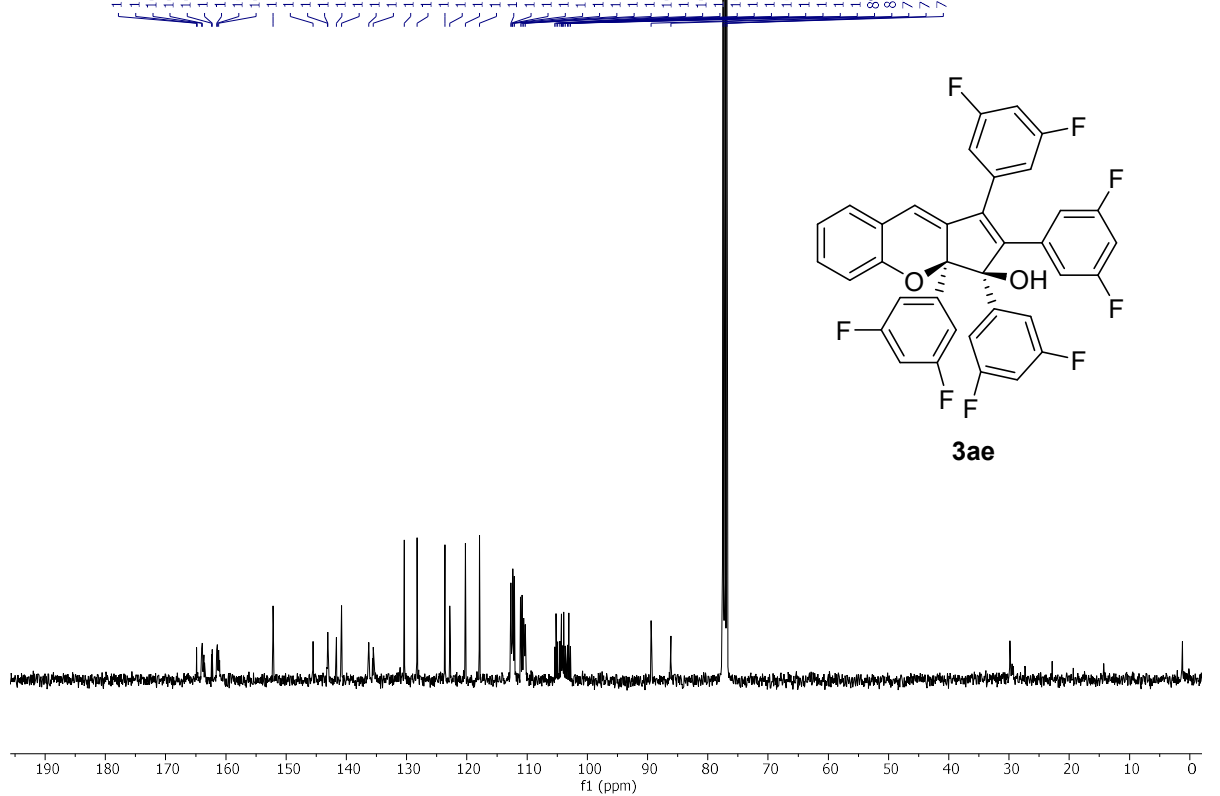

12651  
PB\_460

-107.29  
-108.58  
-109.00

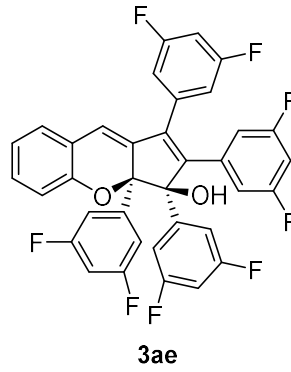

55 -60 -65 -70 -75 -80 -85 -90 -95 -100 -105 -110 -115 -120 -125 -130 -135 -140 -145 -150 -155 -160 -165 -170 -175 -180 -185 -190 -195 -200 -205  
f1 (ppm)

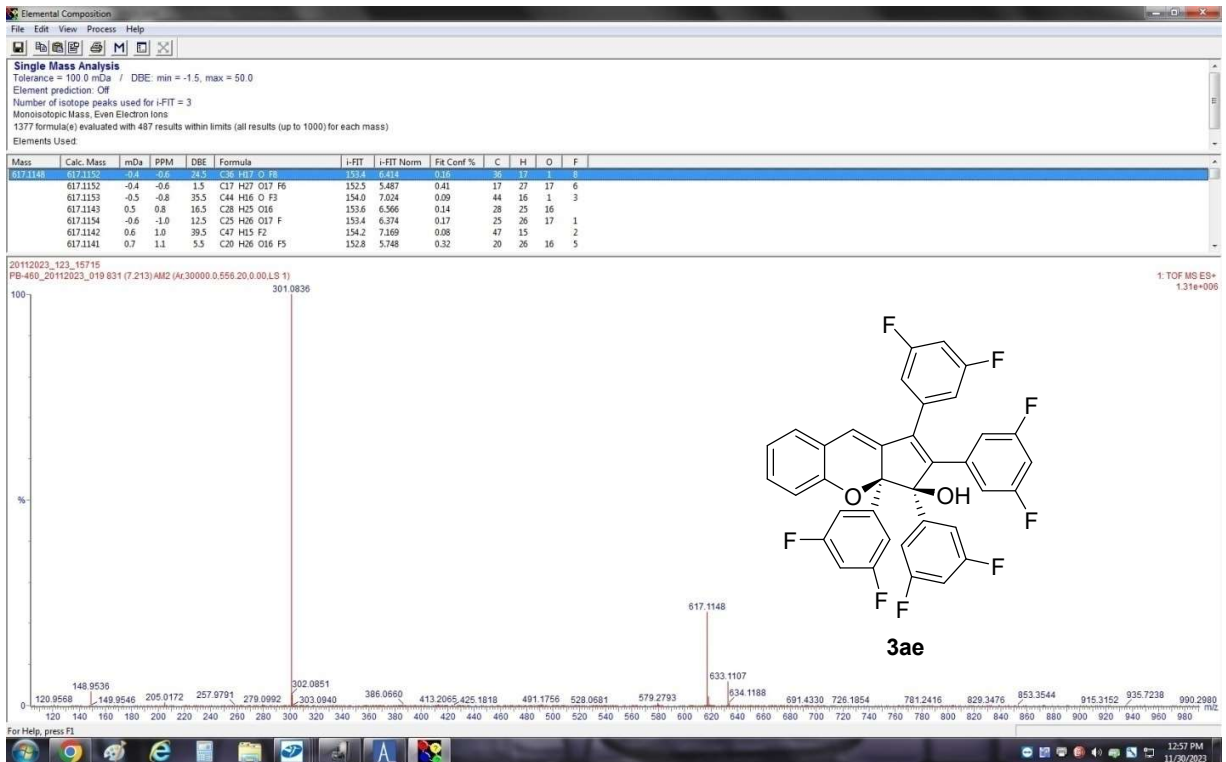



41226.1.fid  
41226  
PB\_462

7.44  
7.42  
7.41  
7.39  
7.26  
7.11  
7.10  
7.09  
7.02  
7.00  
6.98  
6.96  
6.90  
6.88  
6.87  
6.74  
6.57  
— 4.94

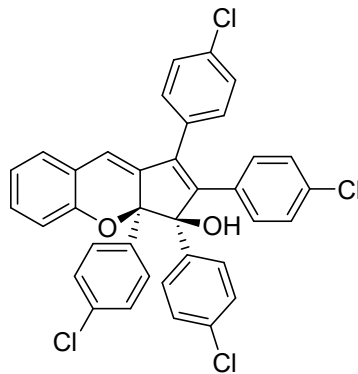

3af

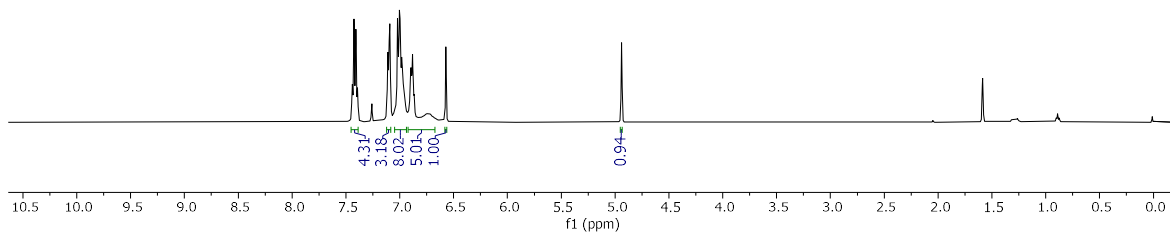

12187  
PB\_462

152.46  
146.77  
143.07  
141.28  
137.95  
137.82  
134.88  
133.84  
133.68  
132.83  
132.38  
131.68  
131.07  
130.89  
129.50  
129.47  
128.81  
128.41  
127.76  
127.72  
127.24  
123.49  
123.09  
118.55  
117.74  
89.52  
86.82  
77.48  
77.16  
76.84

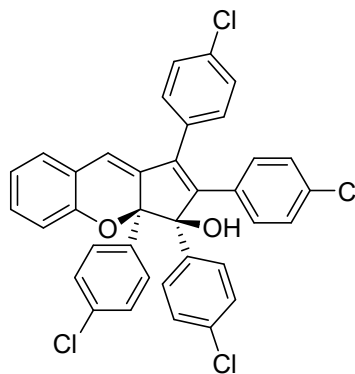

3af

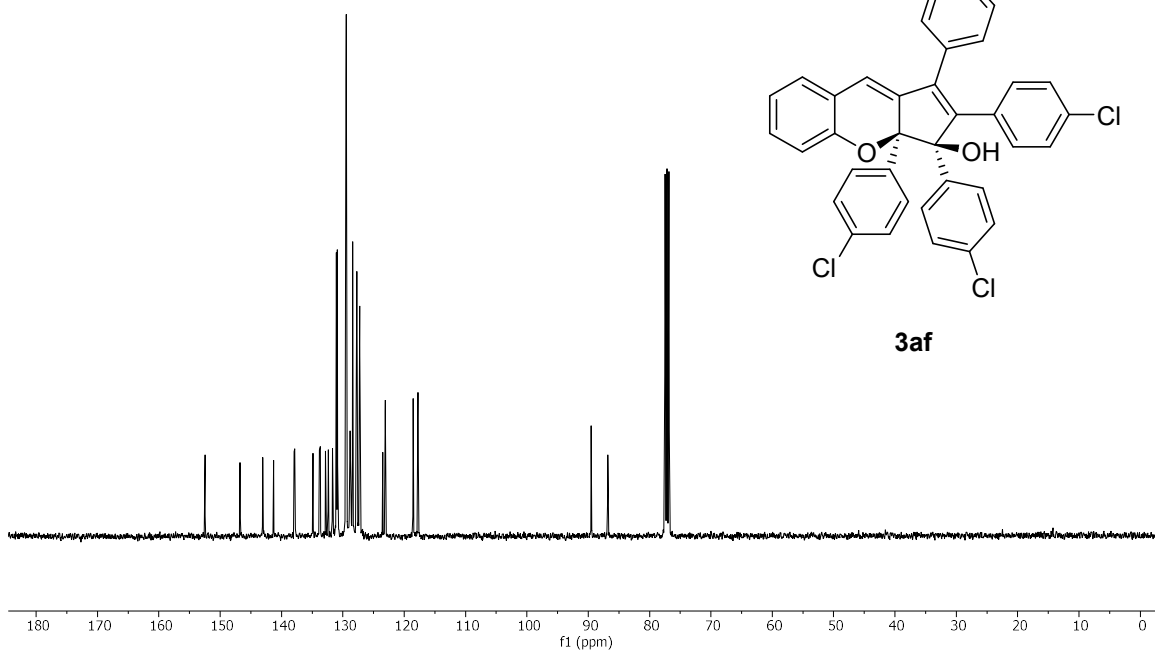

7.49  
7.48  
7.48  
7.44  
7.44  
7.43  
7.42  
7.42  
7.42  
7.41  
7.40  
7.38  
7.36  
7.36  
7.30  
7.30  
7.28  
7.26  
7.21  
7.21  
7.20  
7.15  
7.15  
7.15  
7.13  
7.13  
7.11  
7.11  
7.10  
7.10  
7.09  
7.08  
7.08  
7.08  
7.07  
7.07  
7.06  
7.06  
7.05  
7.05  
7.04  
7.04  
7.04  
7.03  
7.01  
7.01  
6.99  
6.99  
6.98  
6.98  
6.97  
6.97  
6.96  
6.96  
6.95  
6.95  
6.94  
6.94  
6.93  
6.93  
6.92  
6.92  
6.90  
6.90  
6.88  
6.88  
6.74  
6.74  
4.95

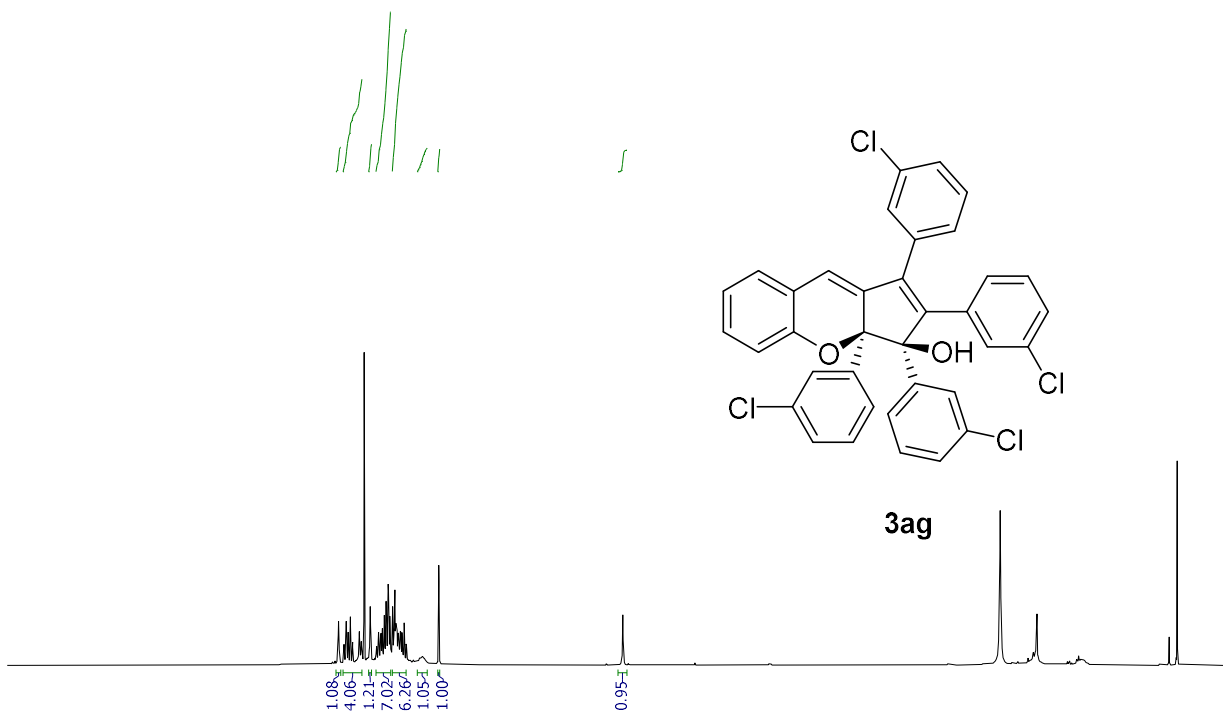

10.0 9.5 9.0 8.5 8.0 7.5 7.0 6.5 6.0 5.5 5.0 4.5 4.0 3.5 3.0 2.5 2.0 1.5 1.0 0.5 0.0

12244  
PB\_103

152.44  
146.47  
142.36  
141.77  
141.39  
135.58  
134.97  
133.88  
133.47  
130.50  
129.69  
129.43  
129.37  
129.31  
129.23  
128.74  
128.23  
128.05  
127.93  
127.85  
127.16  
126.36  
123.39  
123.18  
119.08  
117.86  
89.64  
86.67  
77.16  
76.84

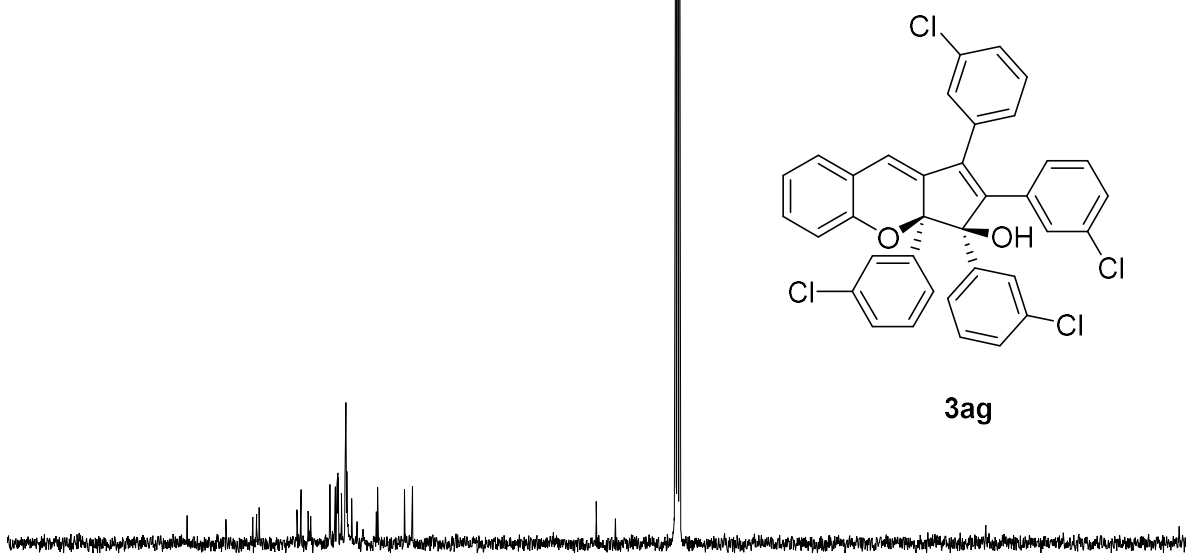

80 170 160 150 140 130 120 110 100 90 80 70 60 50 40 30 20 10 0

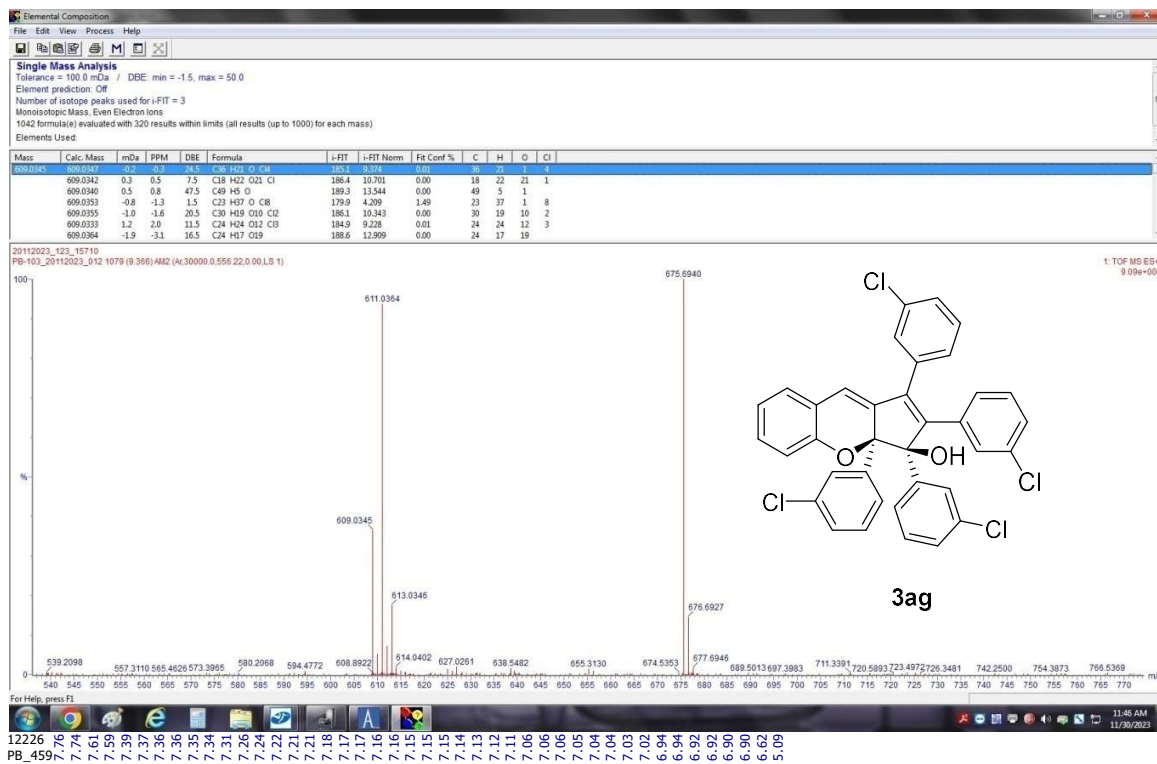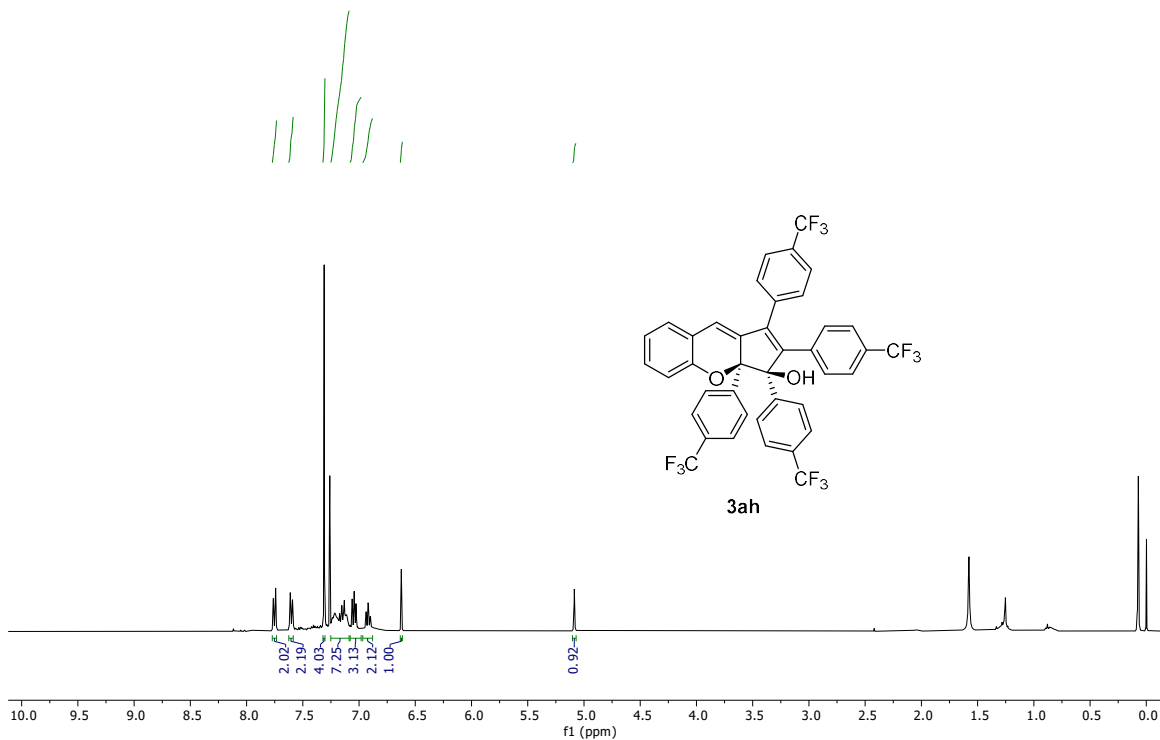

12241  
TG\_459

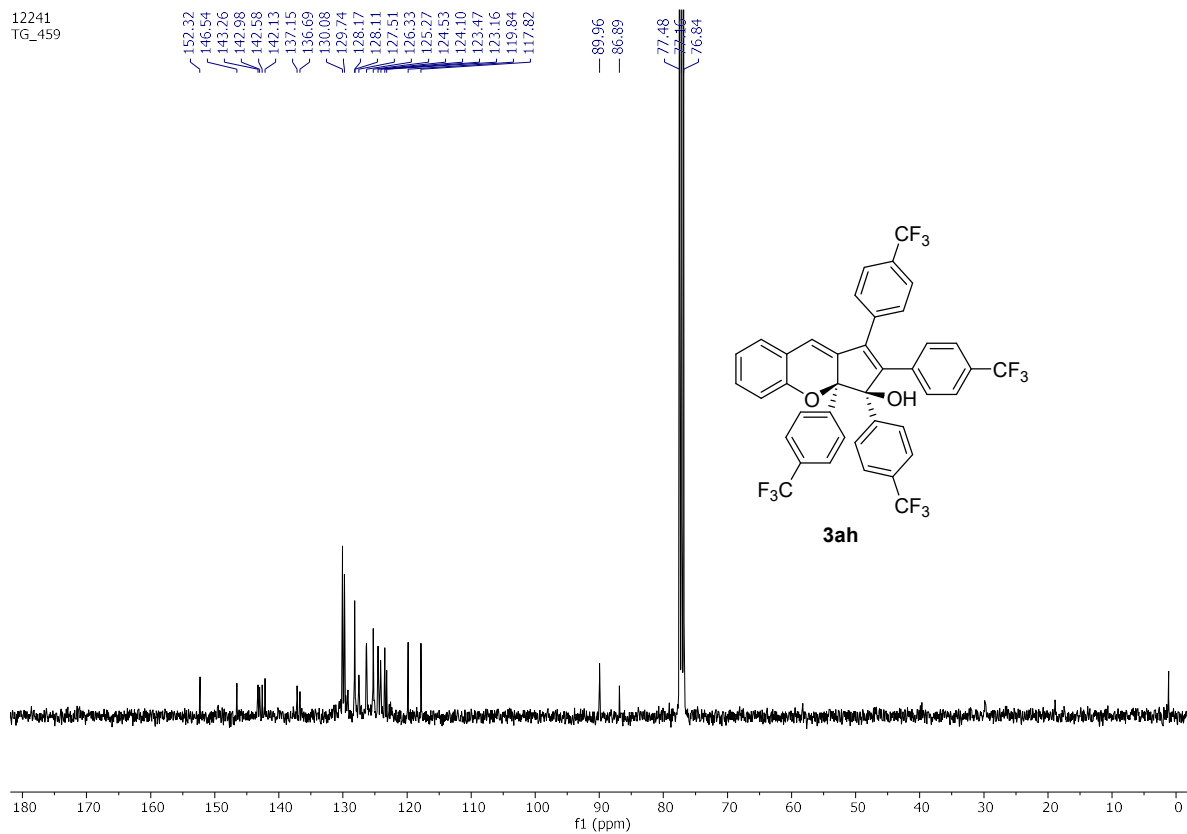

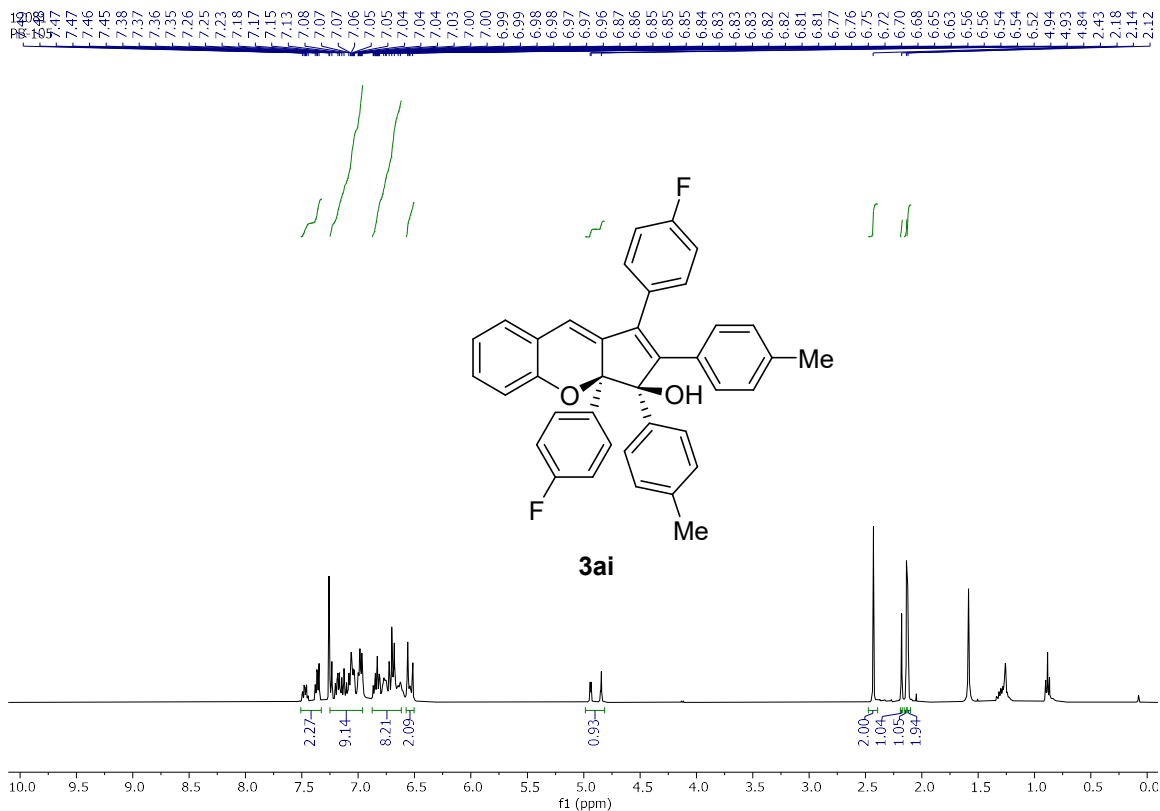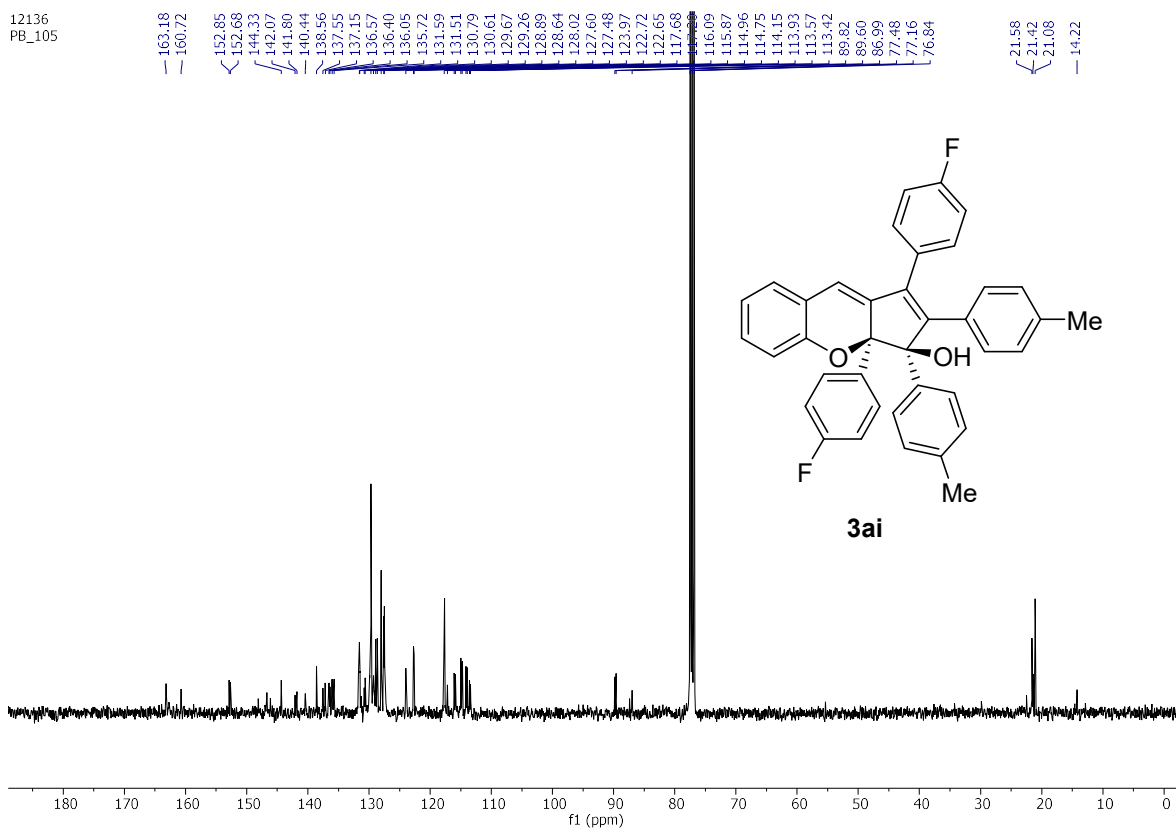

12622  
PB\_105

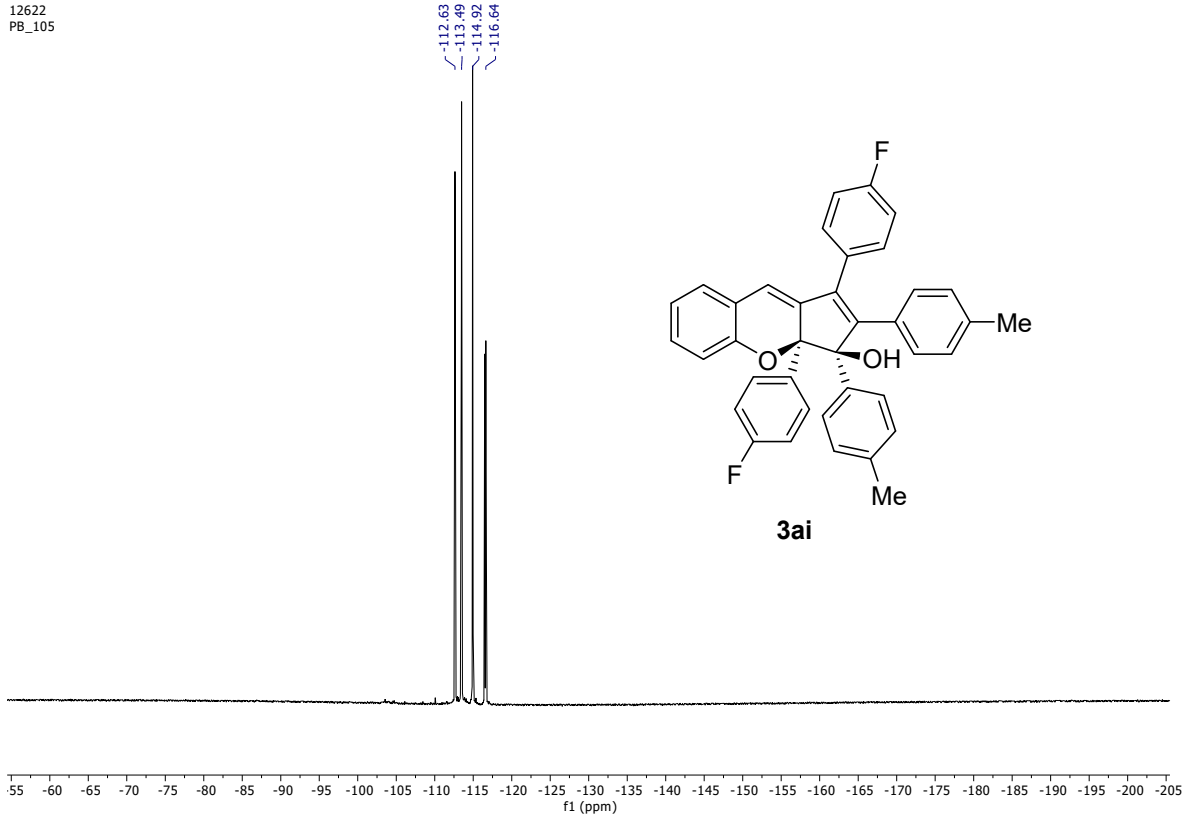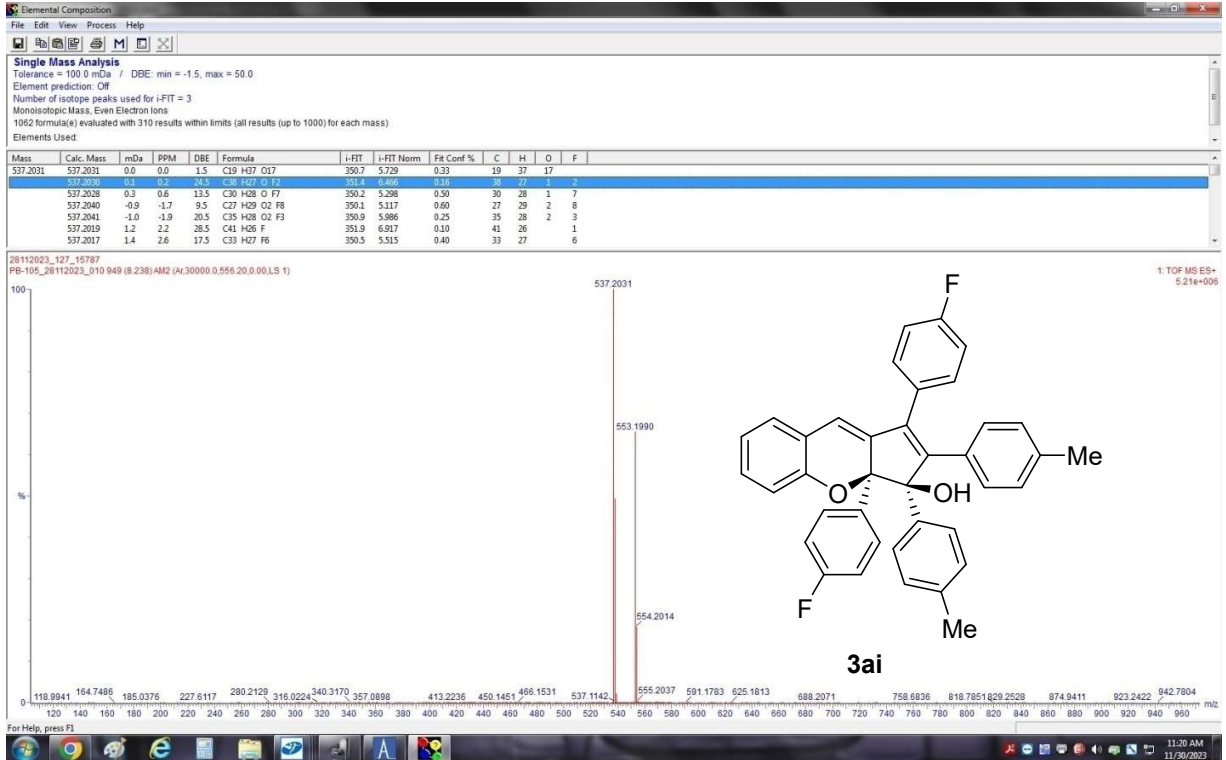

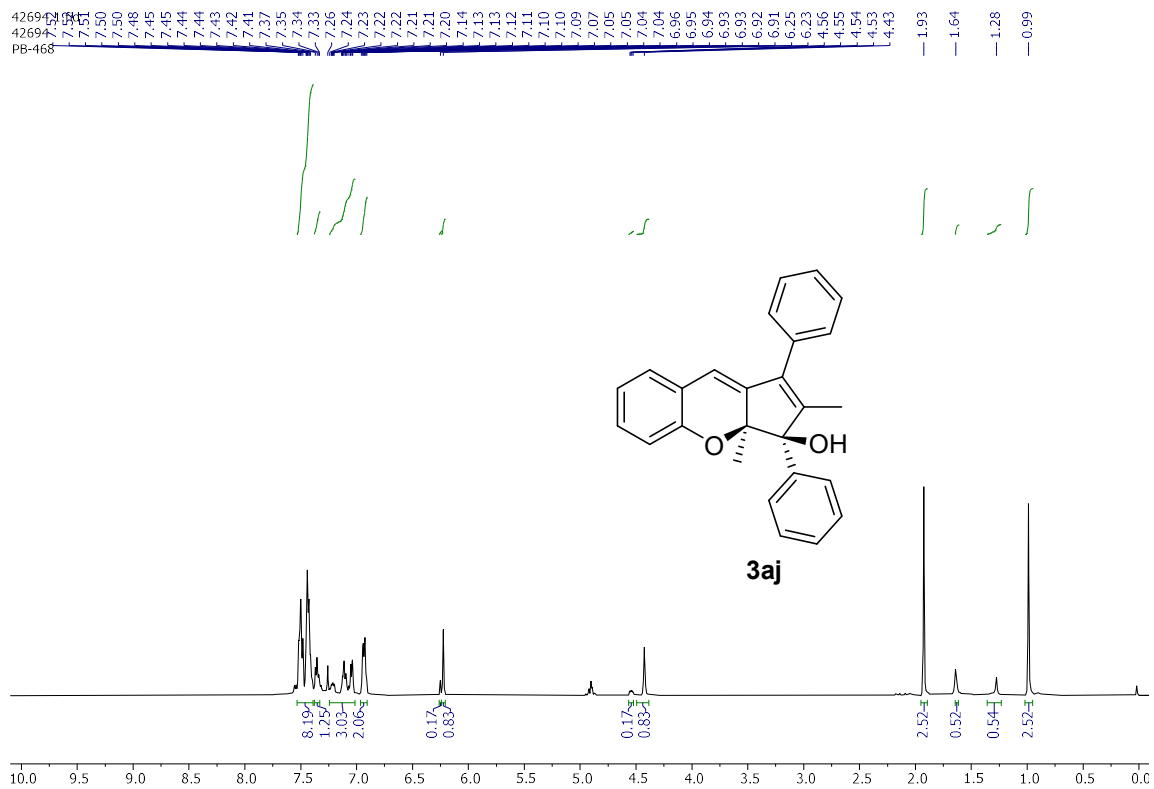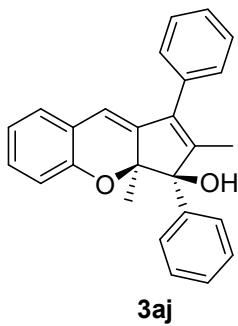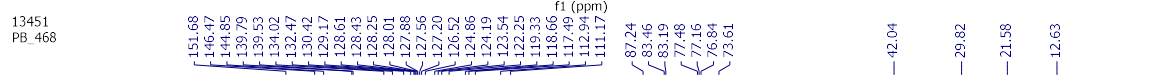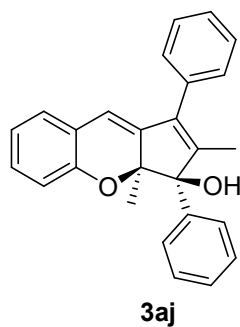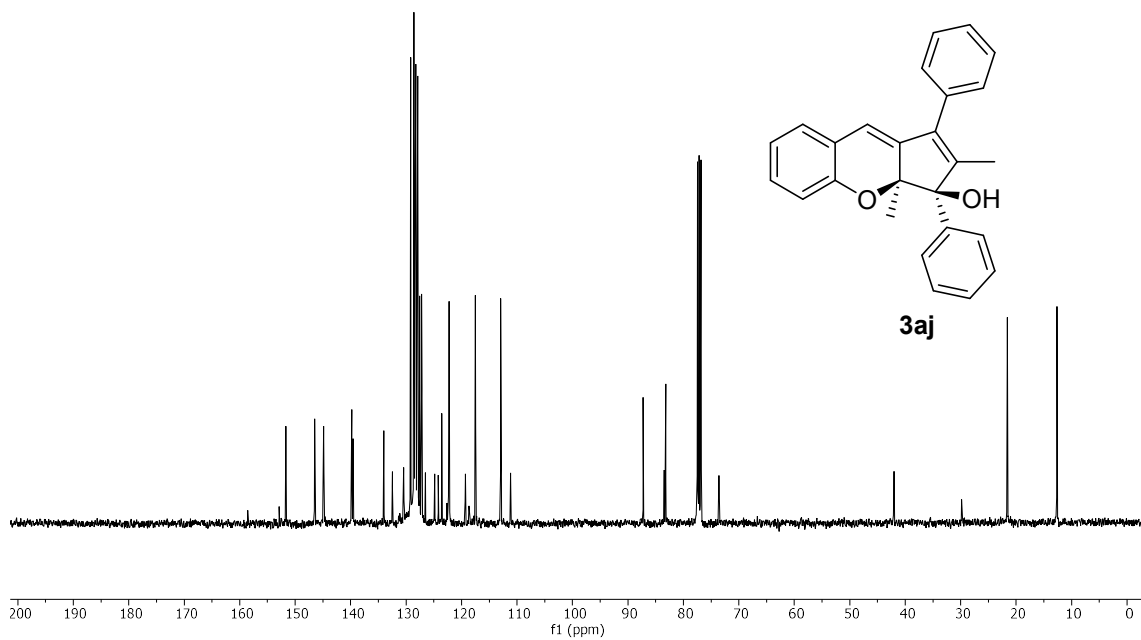

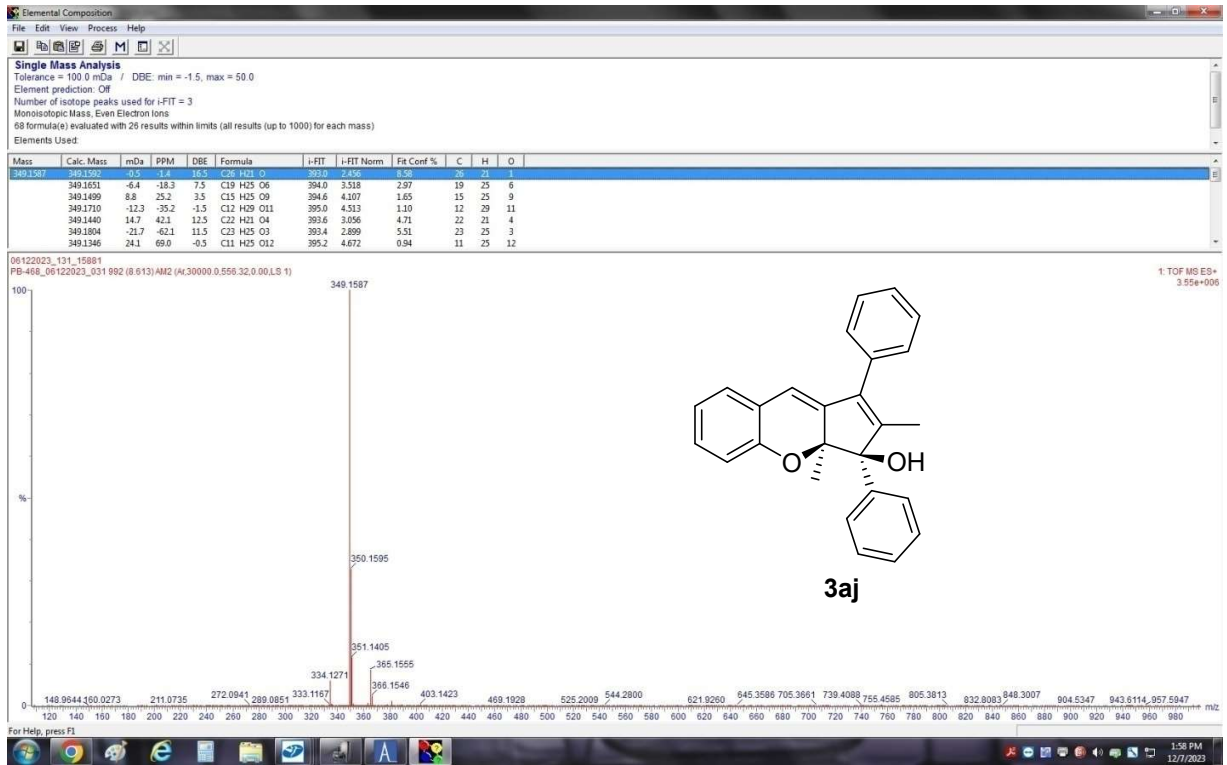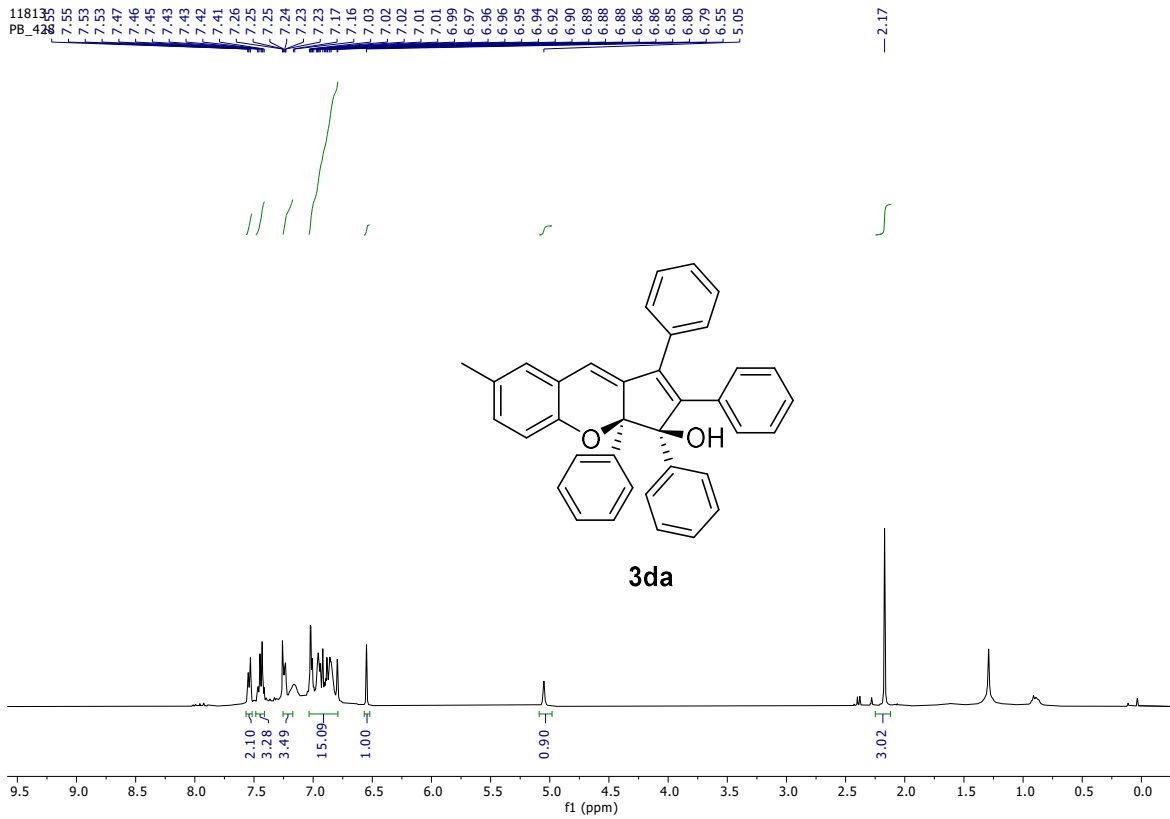



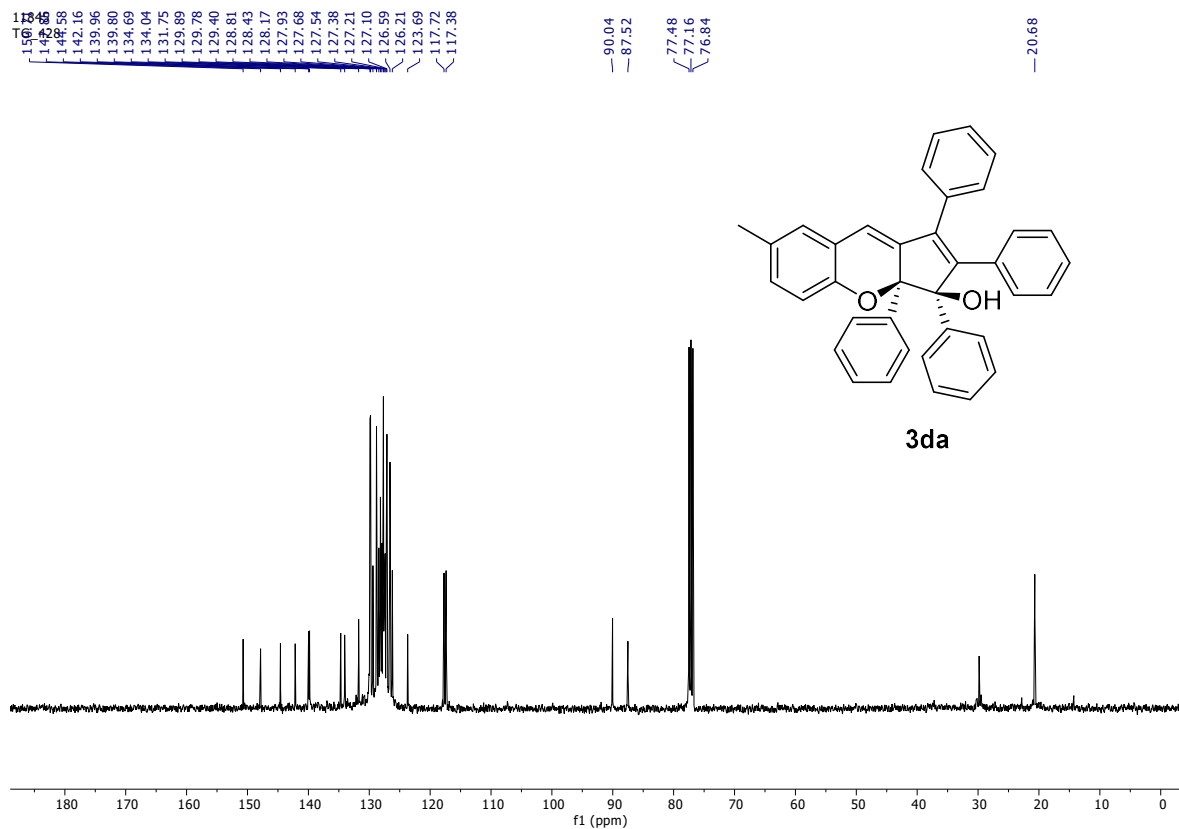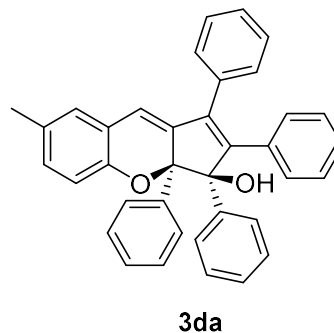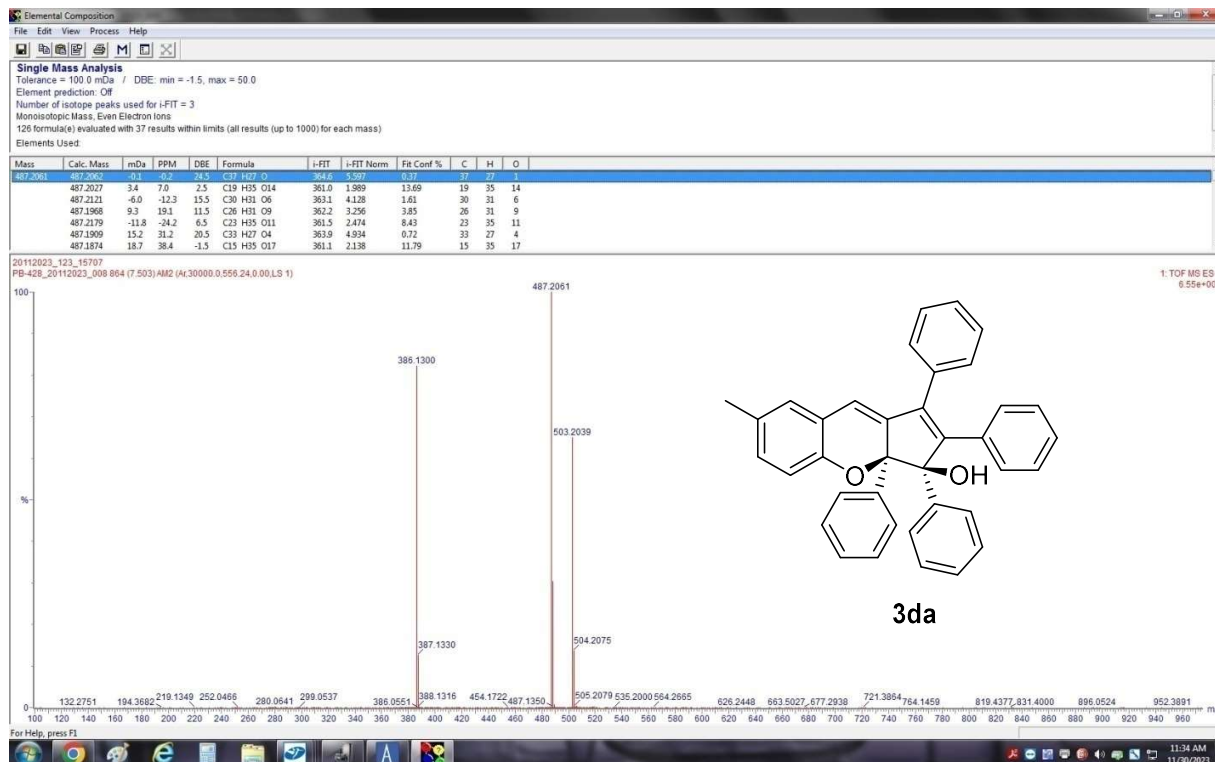

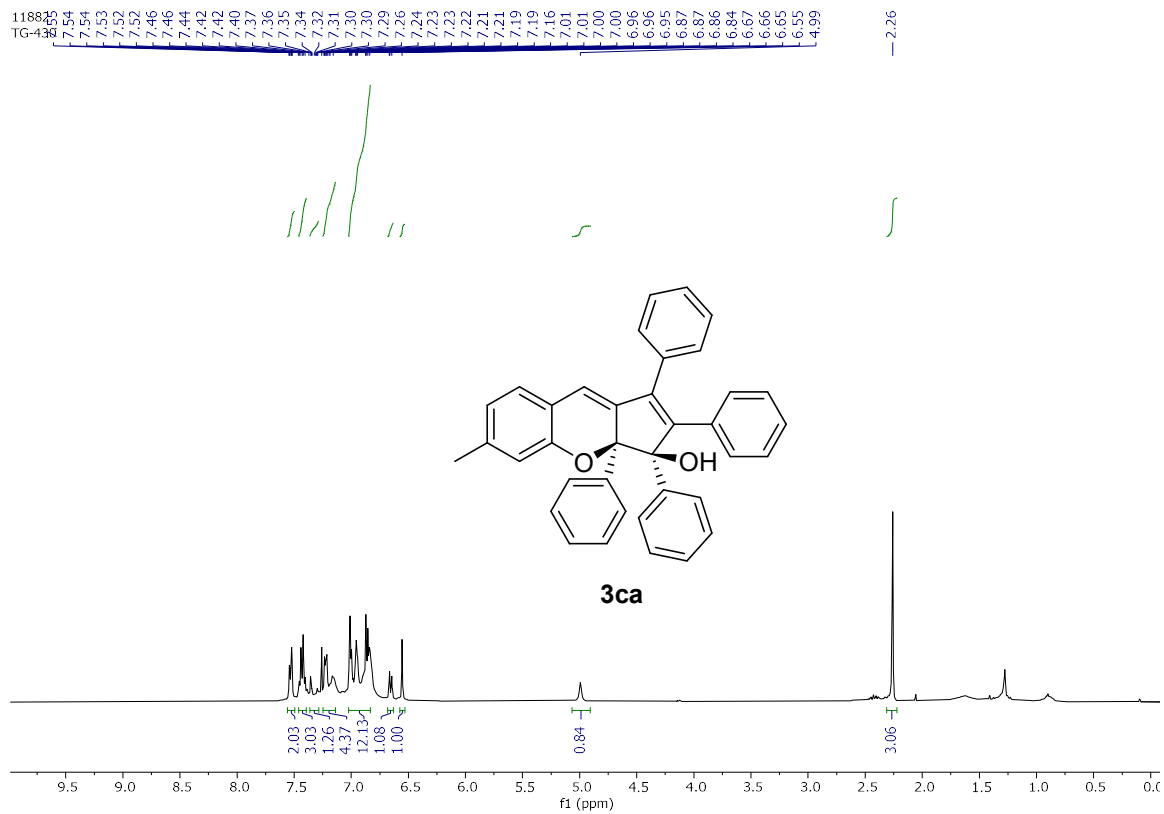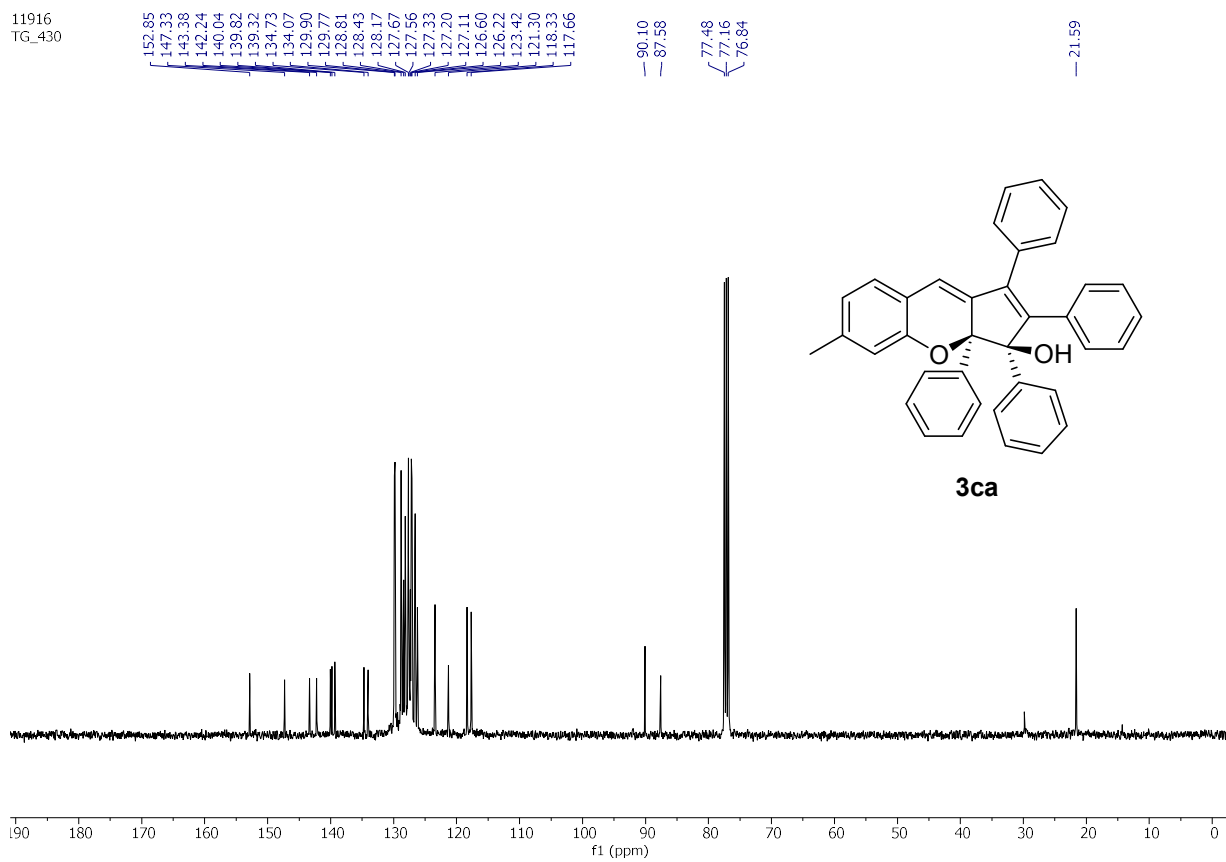

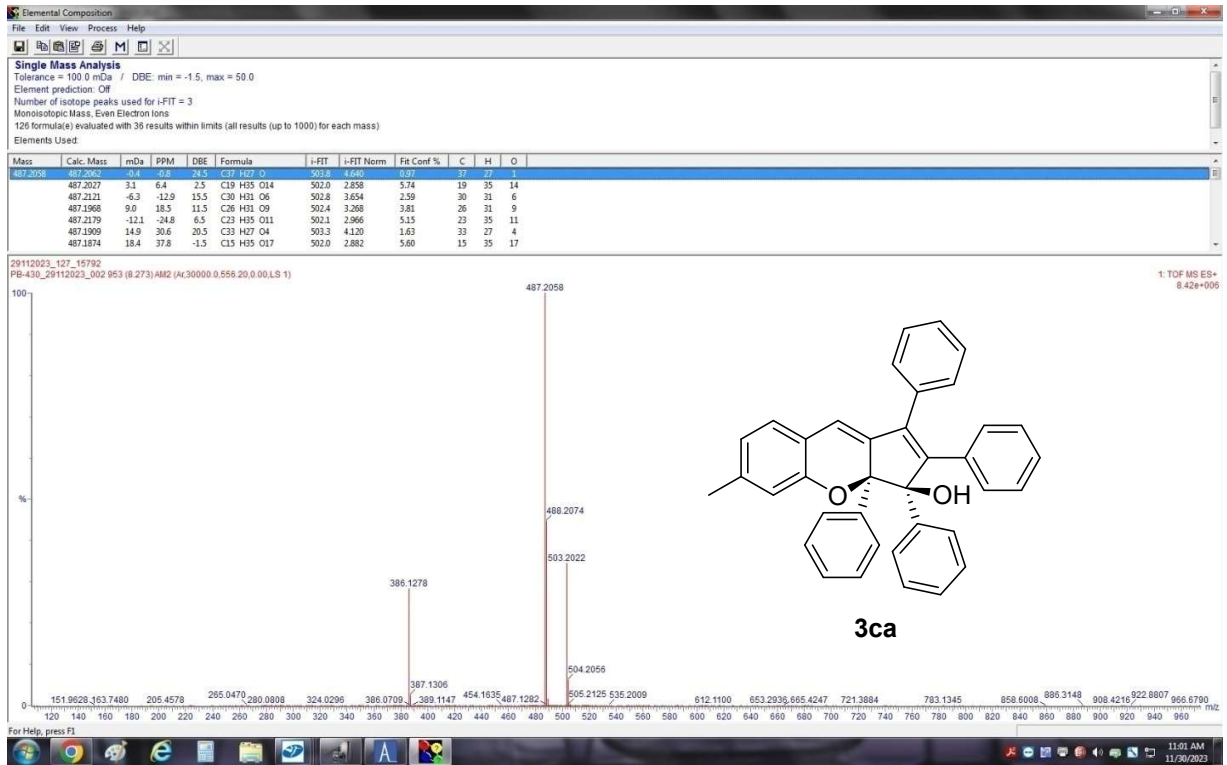

11910  
JP\_113

7.45  
7.44  
7.44  
7.43  
7.37  
7.36  
7.35  
7.34  
7.33  
7.33  
7.33  
7.32  
7.32  
7.31  
7.31  
7.16  
7.15  
7.14  
7.14  
7.13  
7.13  
7.12  
7.08  
7.07  
7.06  
7.06  
7.04  
7.04  
6.93  
6.92  
6.92  
6.91  
6.91  
6.87  
6.86  
6.85  
6.84  
6.83  
6.83  
6.82  
6.81  
6.80  
6.80  
6.78  
6.76  
6.75  
6.75  
6.73  
6.73  
6.67  
6.65  
6.64  
6.48  
4.99  
2.30

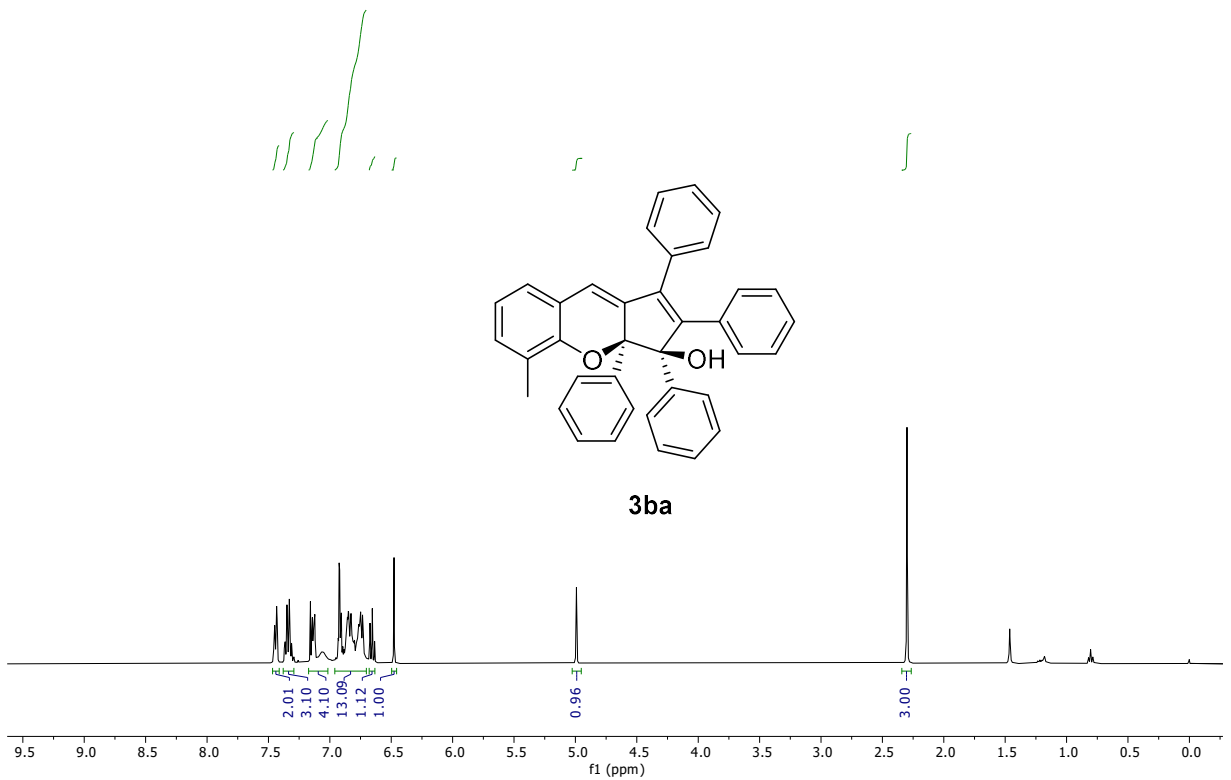

11892  
PB\_113

150.86  
147.72  
143.86  
142.10  
140.10  
139.99  
134.72  
134.08  
130.54  
129.90  
129.80  
128.84  
128.45  
128.14  
127.69  
127.39  
127.30  
127.26  
127.11  
126.71  
126.26  
126.23  
125.33  
123.45  
122.05  
117.96

90.15  
87.69  
77.48  
77.16  
76.84

15.96

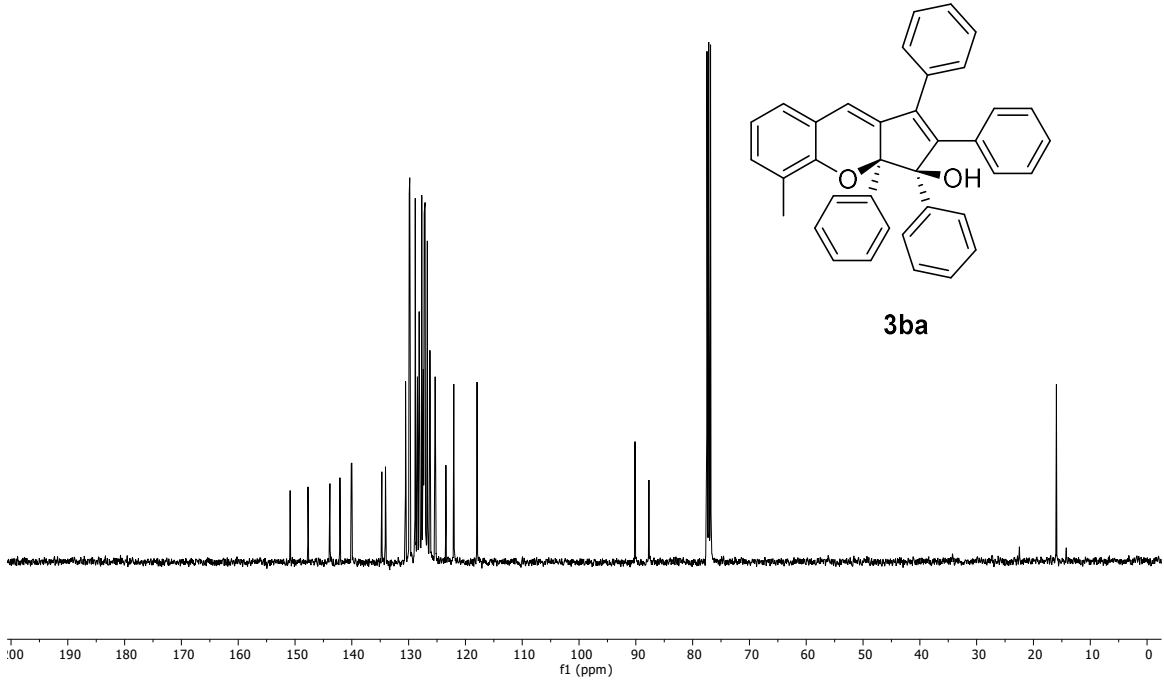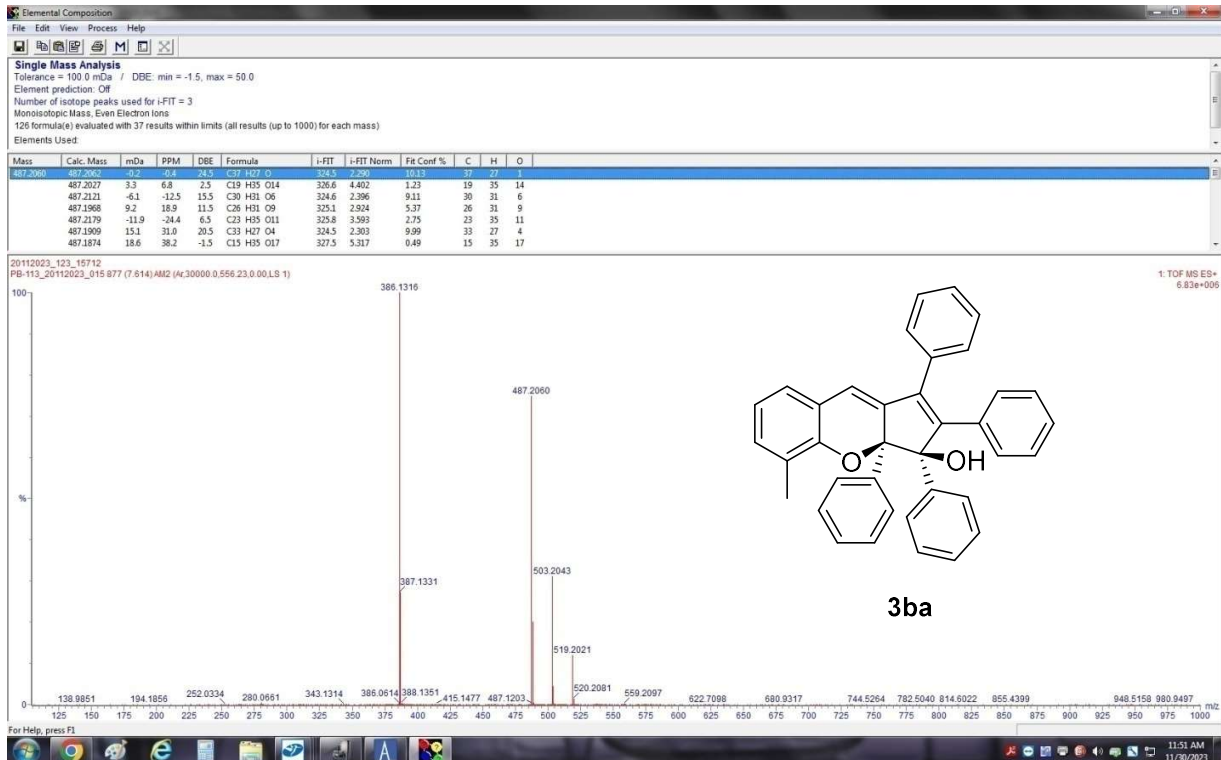

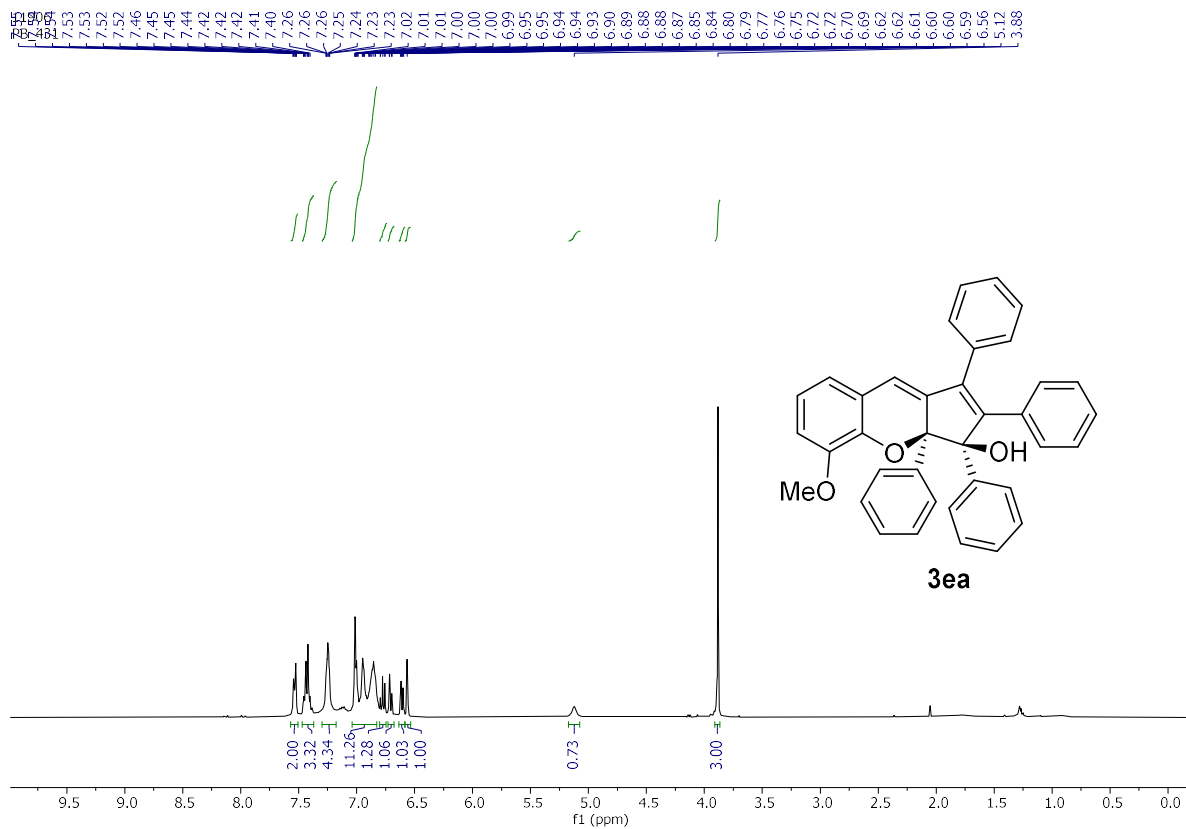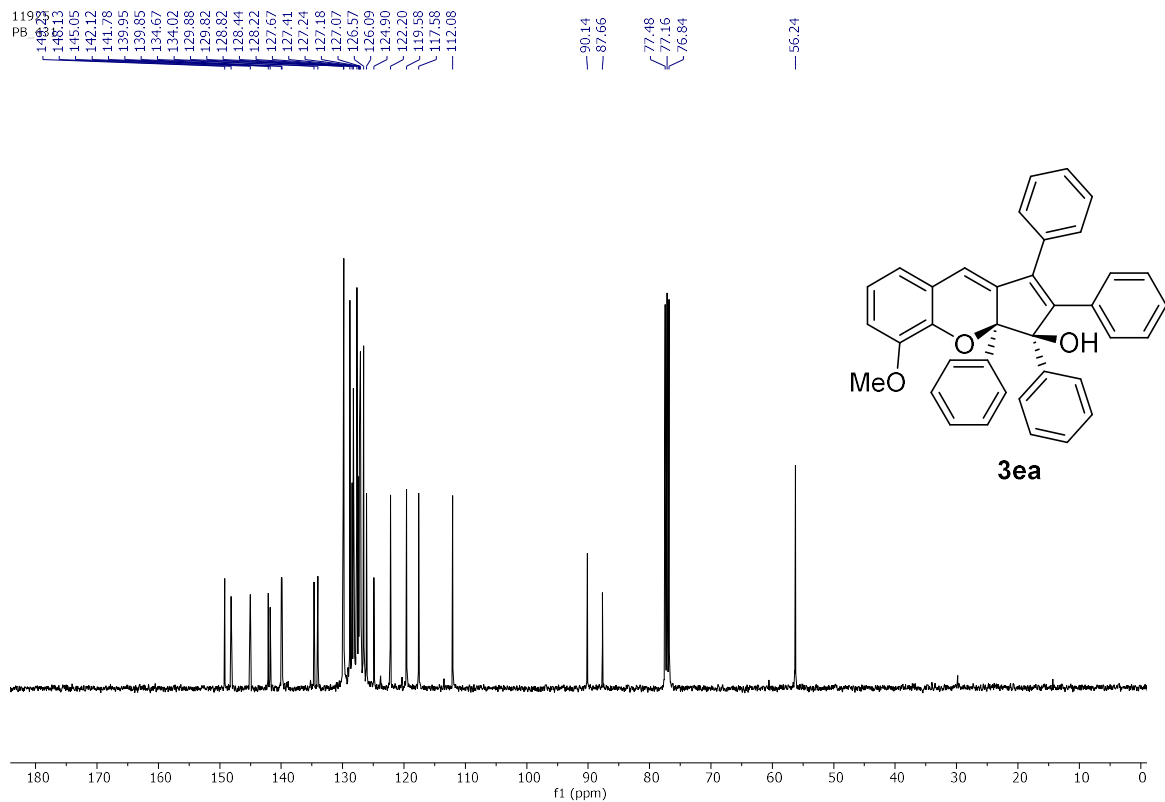

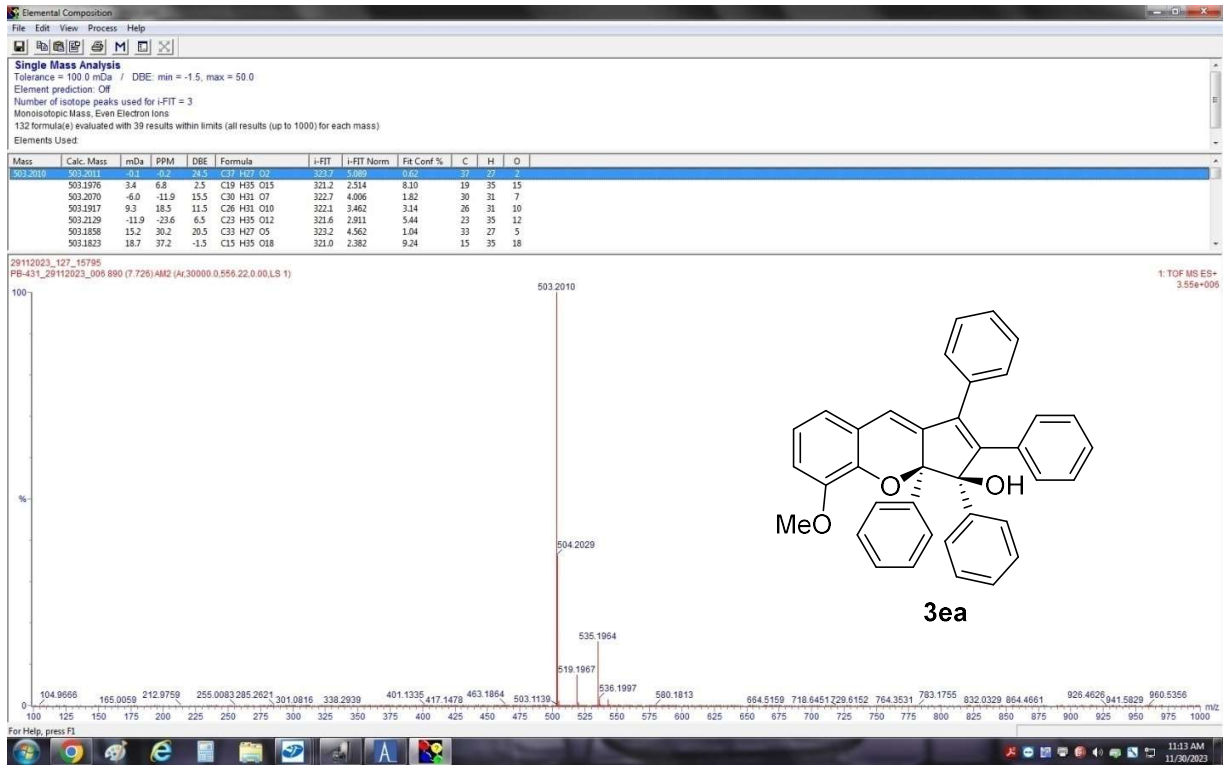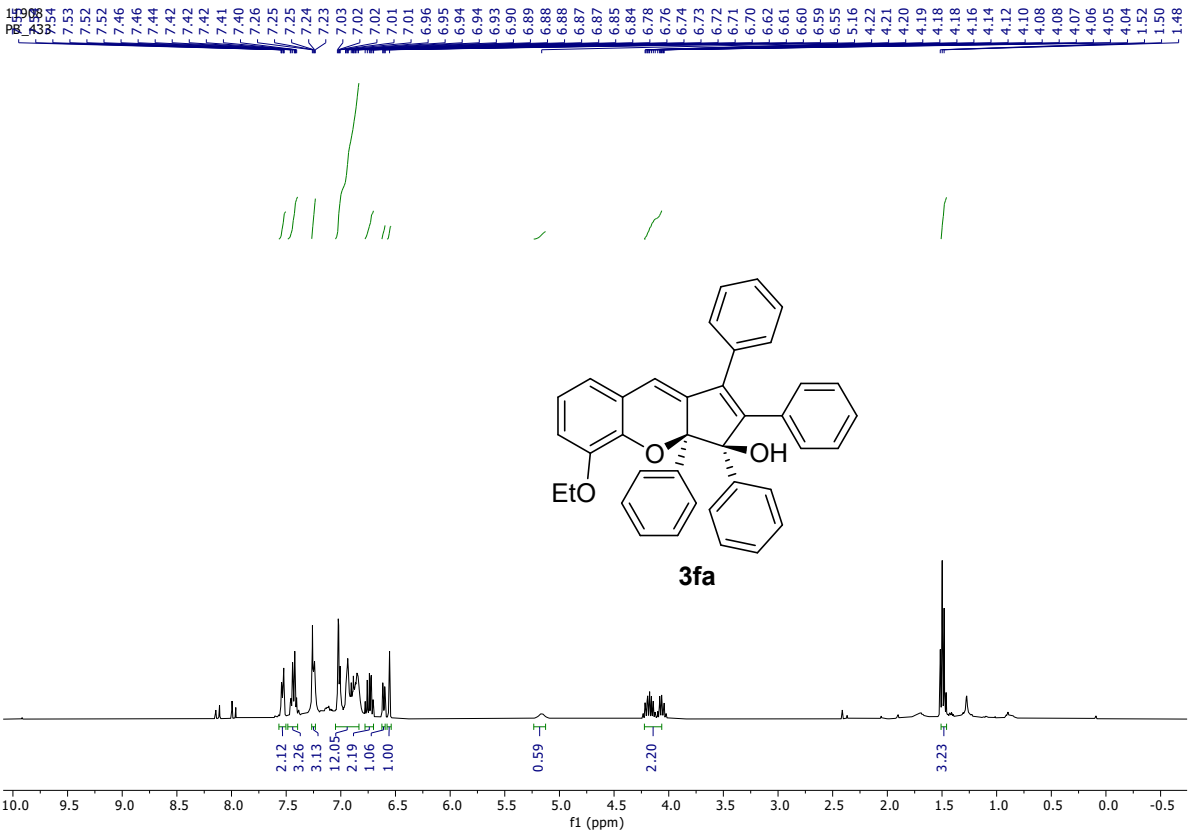

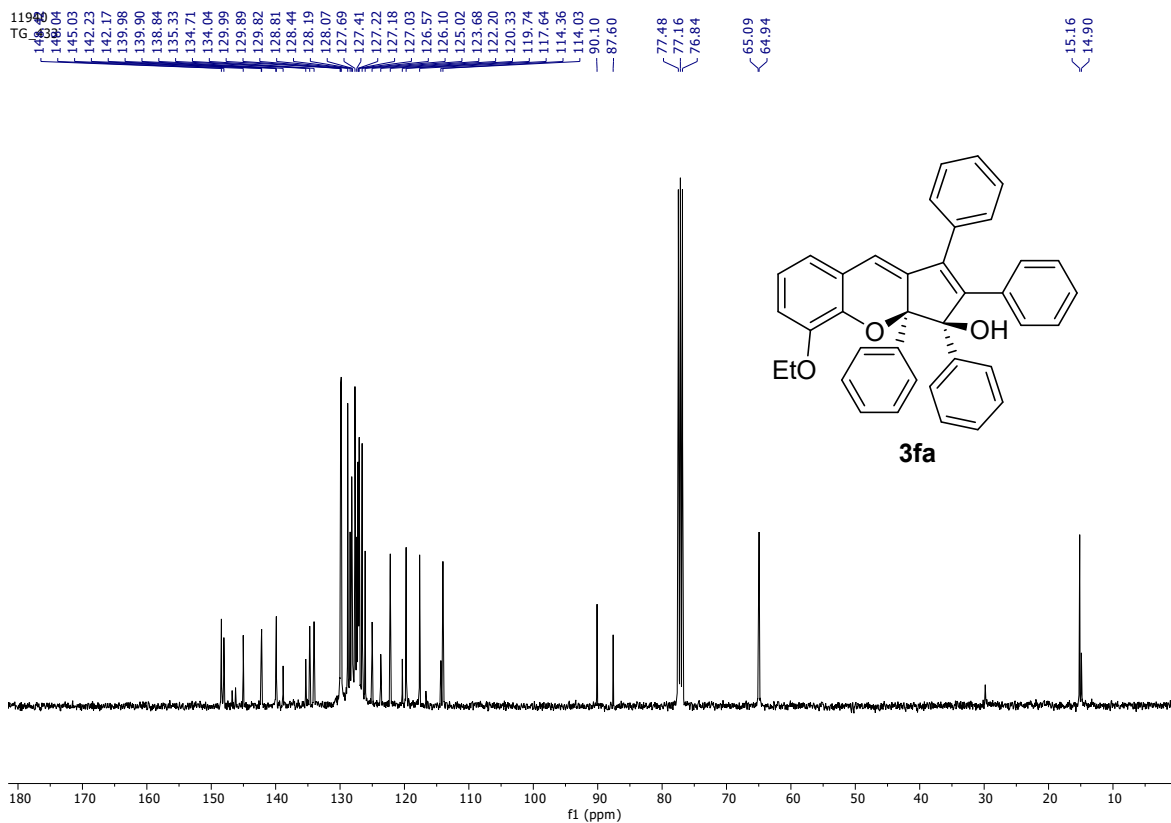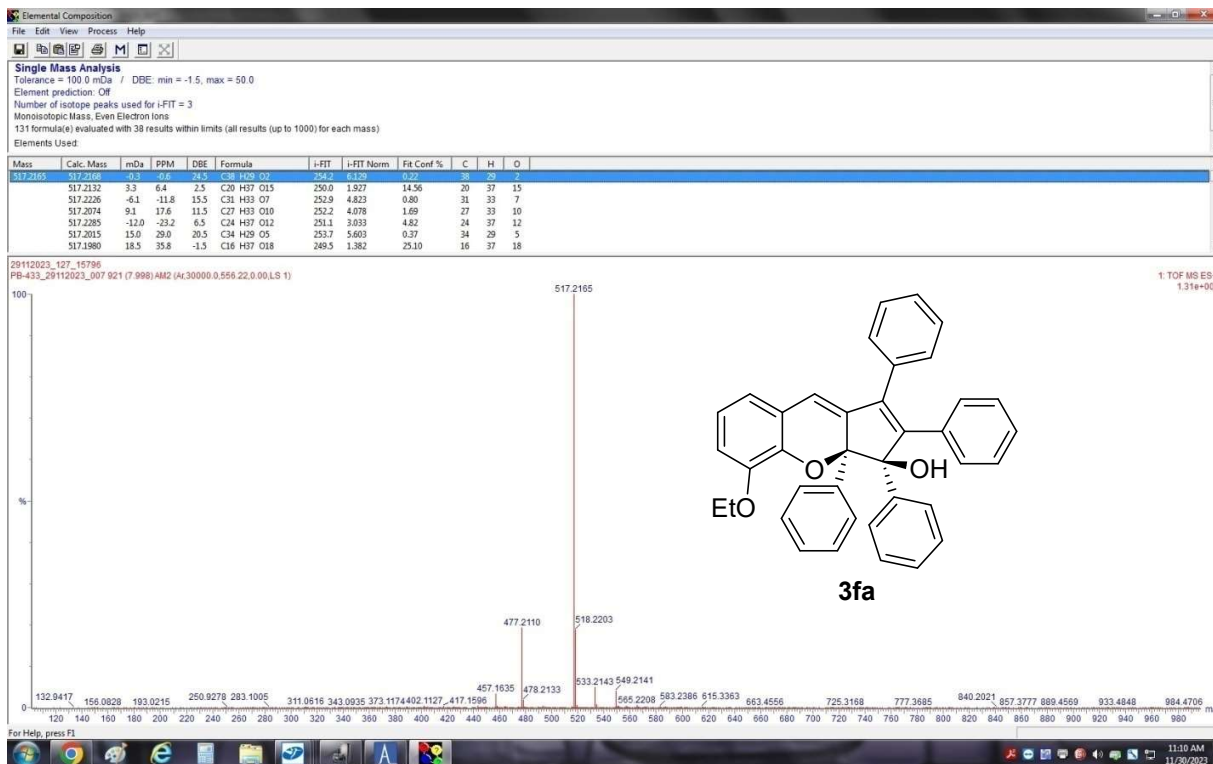

411279  
411278  
PB-43L

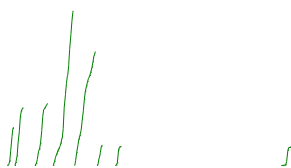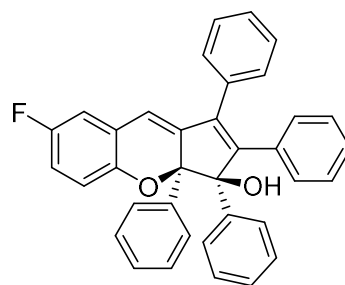

3ga

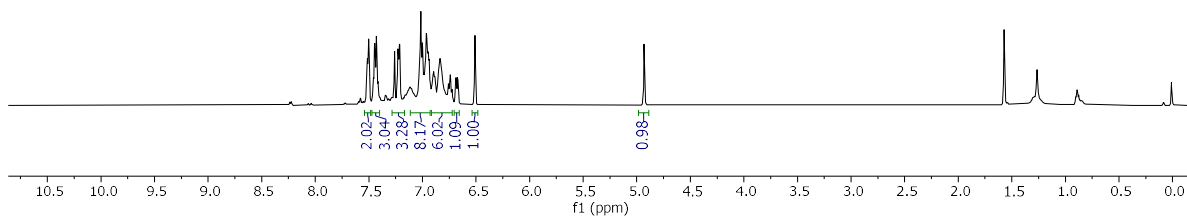

12057  
JP 432

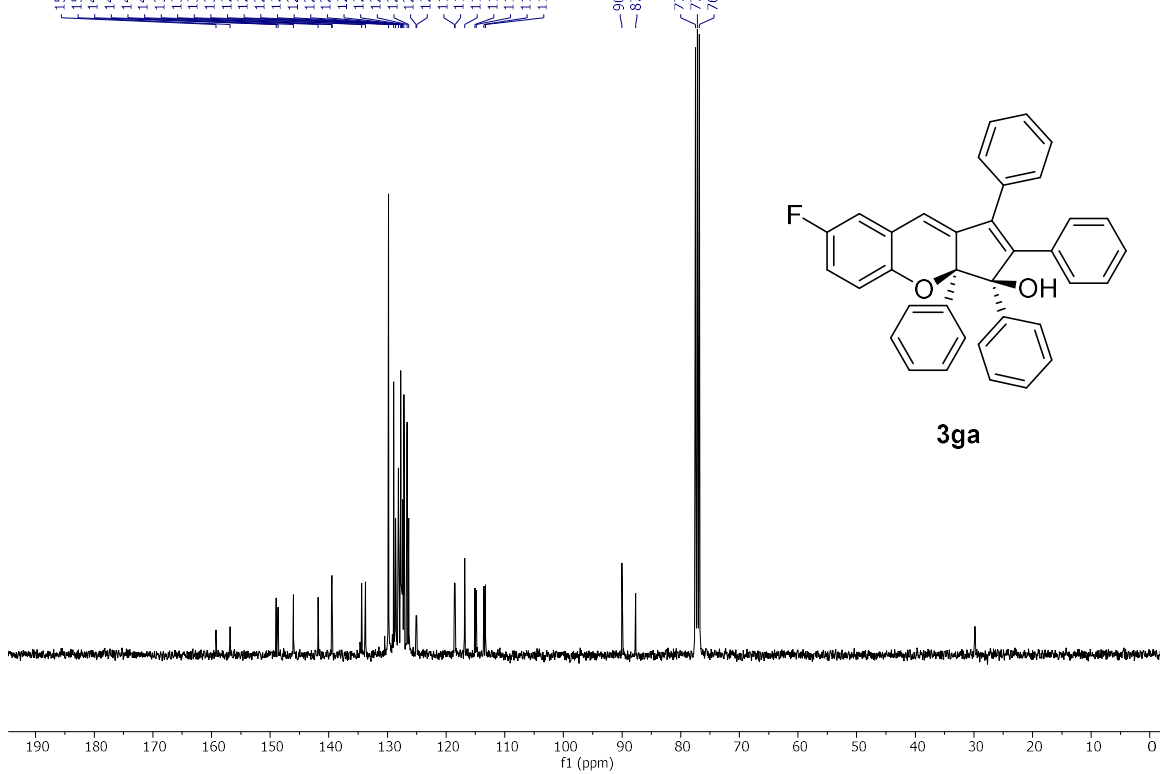

3ga



12607  
PB\_432

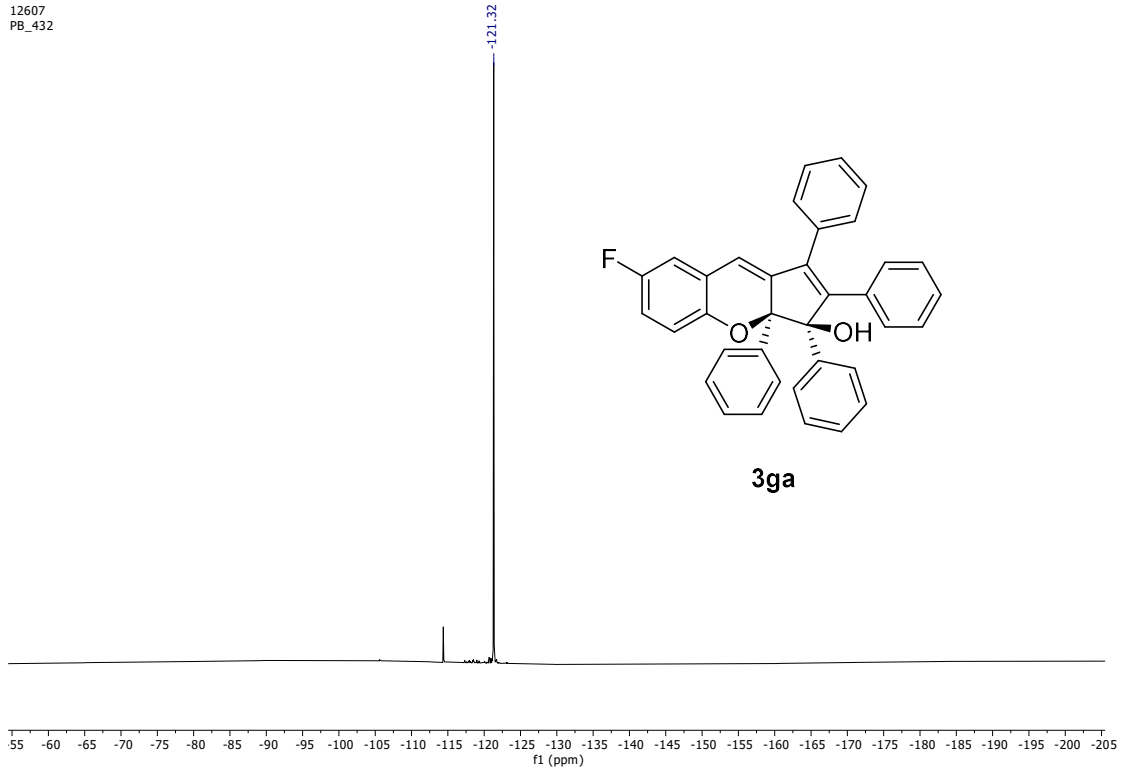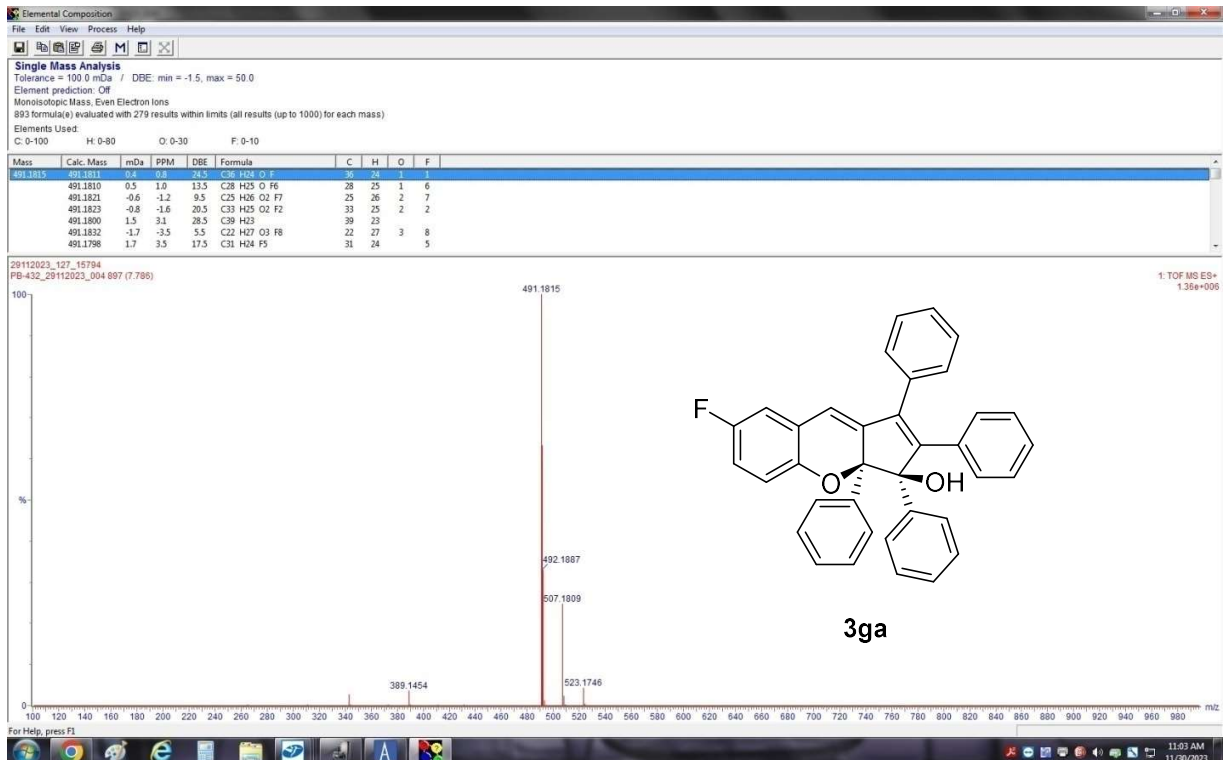

11867  
PB-428  
7.51  
7.50  
7.50  
7.49  
7.49  
7.47  
7.46  
7.45  
7.44  
7.43  
7.43  
7.42  
7.41  
7.41  
7.26  
7.24  
7.23  
7.23  
7.22  
7.22  
7.21  
7.15  
7.12  
7.12  
7.11  
7.11  
7.10  
7.09  
7.02  
7.02  
7.01  
7.01  
6.99  
6.99  
6.98  
6.96  
6.95  
6.95  
6.93  
6.90  
6.88  
6.88  
6.86  
6.84  
6.82  
6.50  
4.85

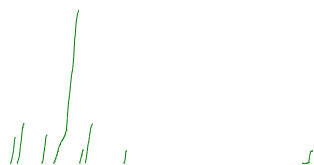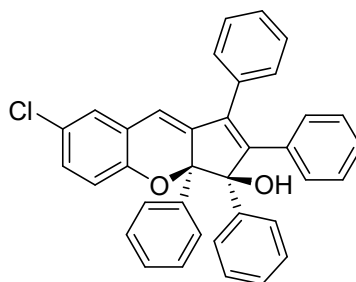

**3ha**

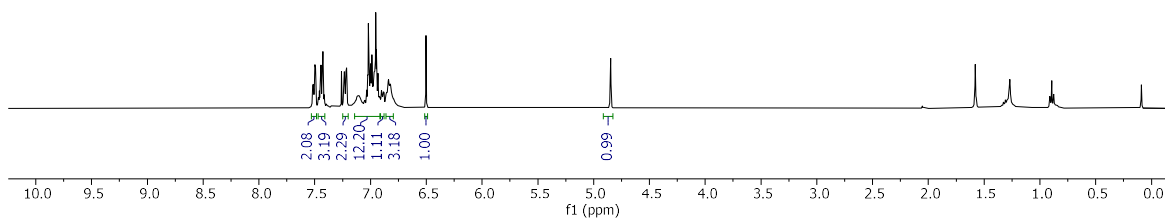

11915  
BB\_425

151.40  
148.85  
145.02  
141.87  
139.41  
134.39  
133.70  
129.83  
128.93  
128.63  
128.35  
128.11  
127.75  
127.67  
127.90  
127.36  
127.36  
127.22  
126.92  
126.69  
126.39  
125.45  
118.94  
116.57  
90.04  
87.82  
77.48  
77.16  
76.84

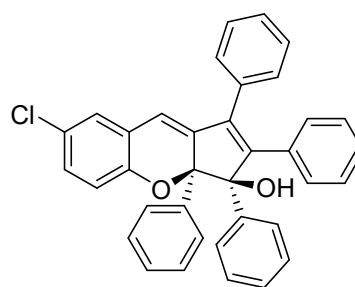

**3ha**

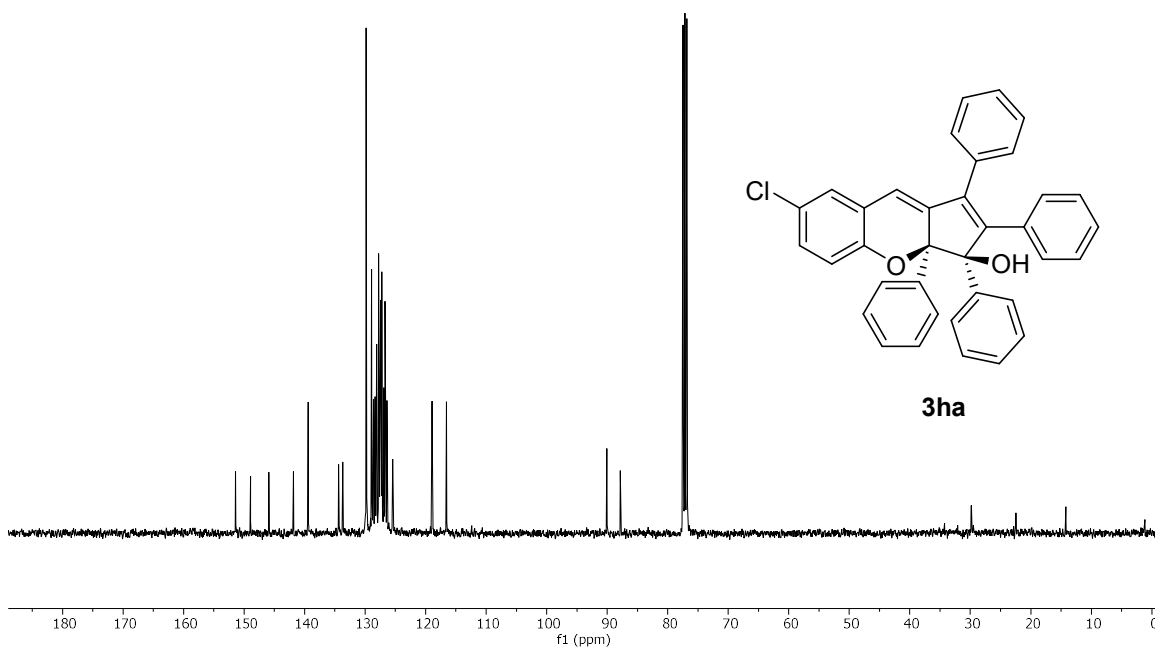

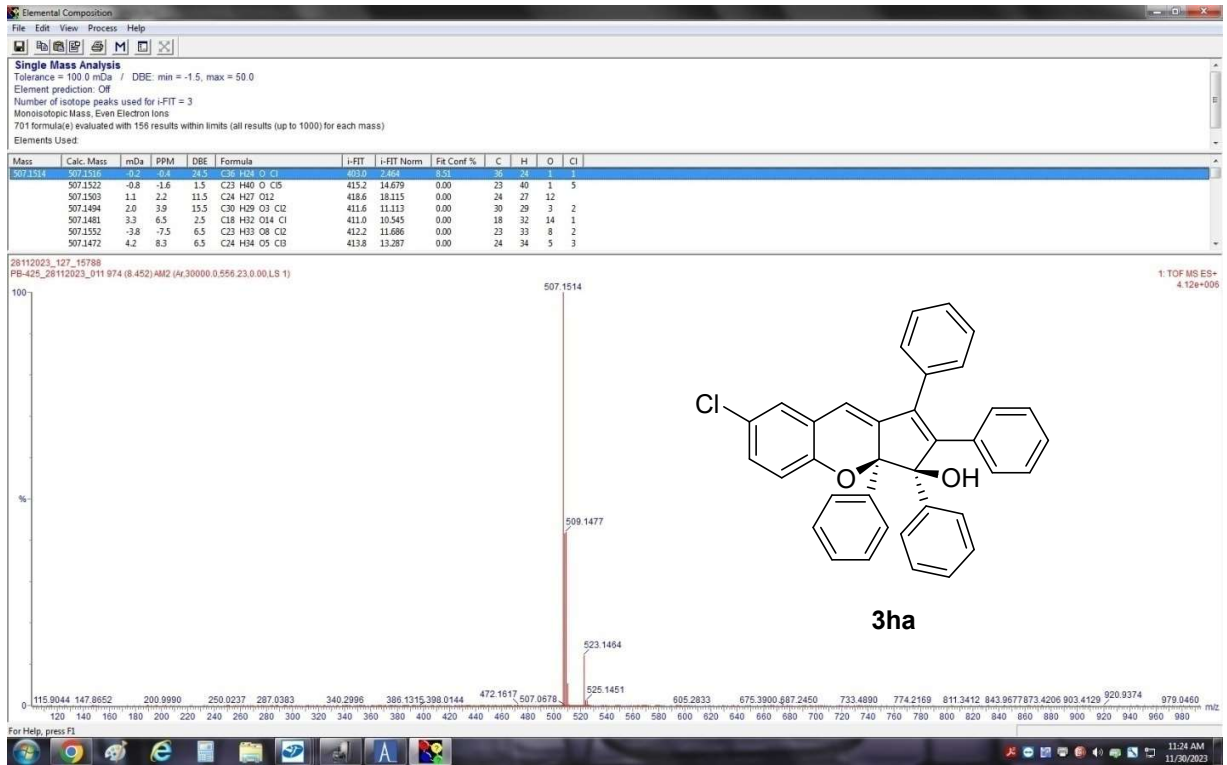

41175.1.fid  
 41175  
 PB-429

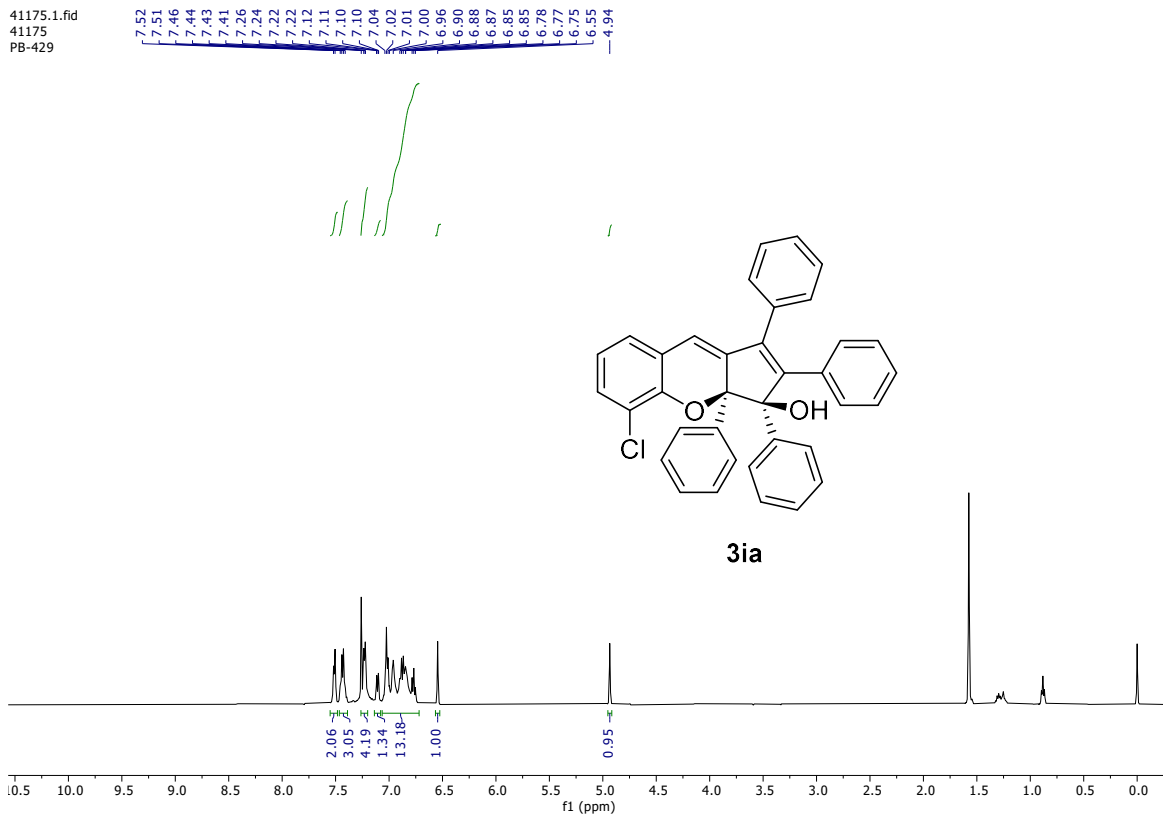

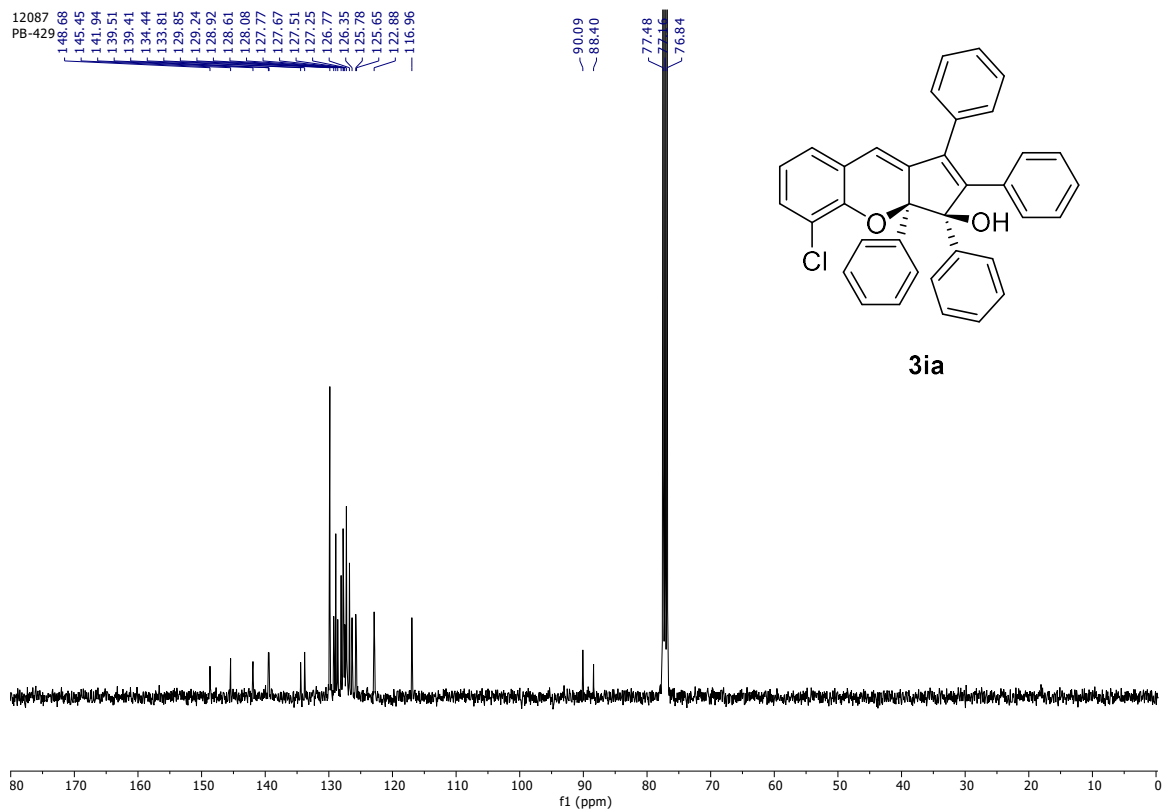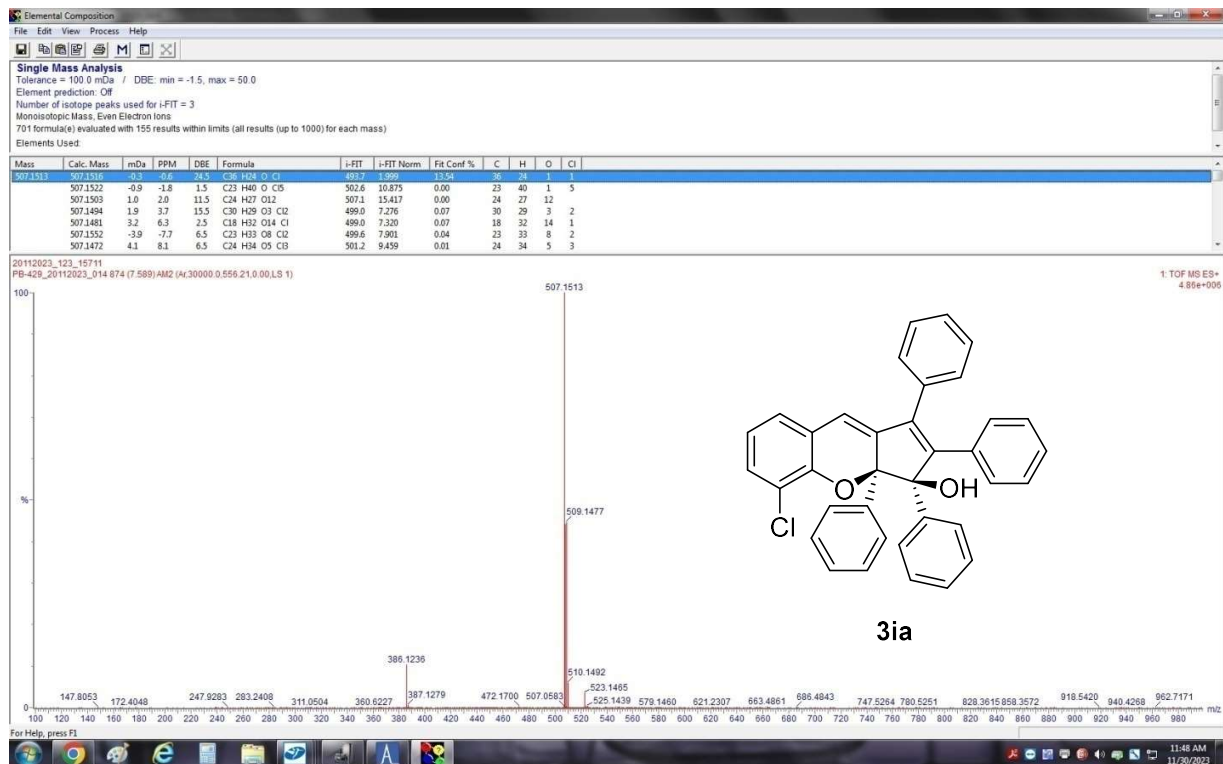

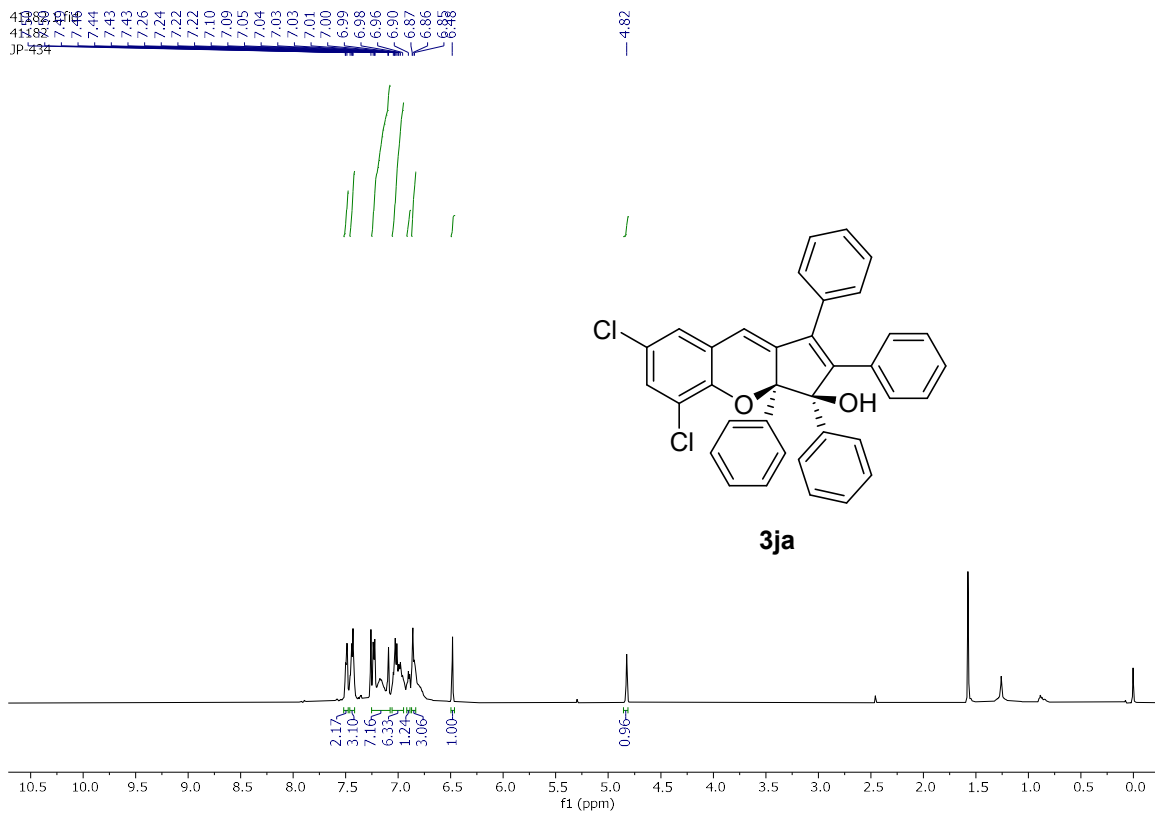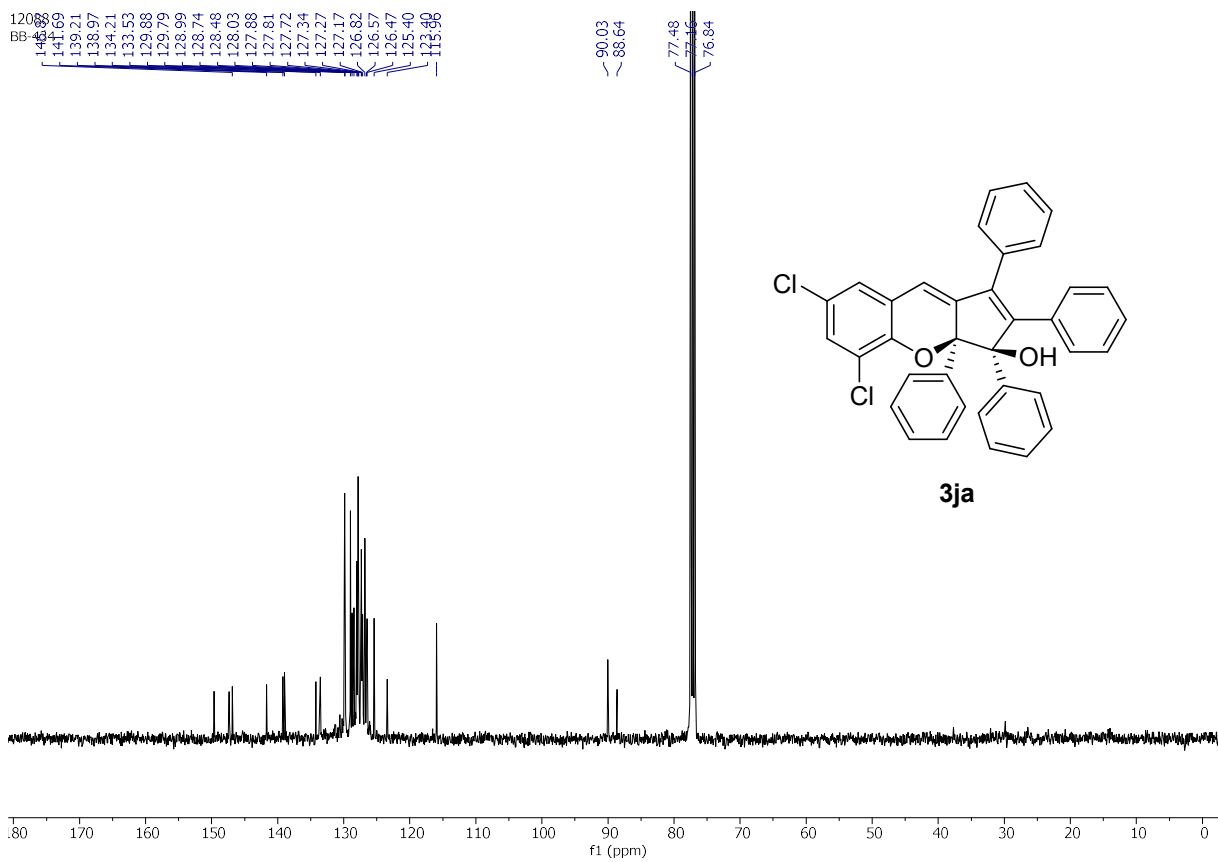

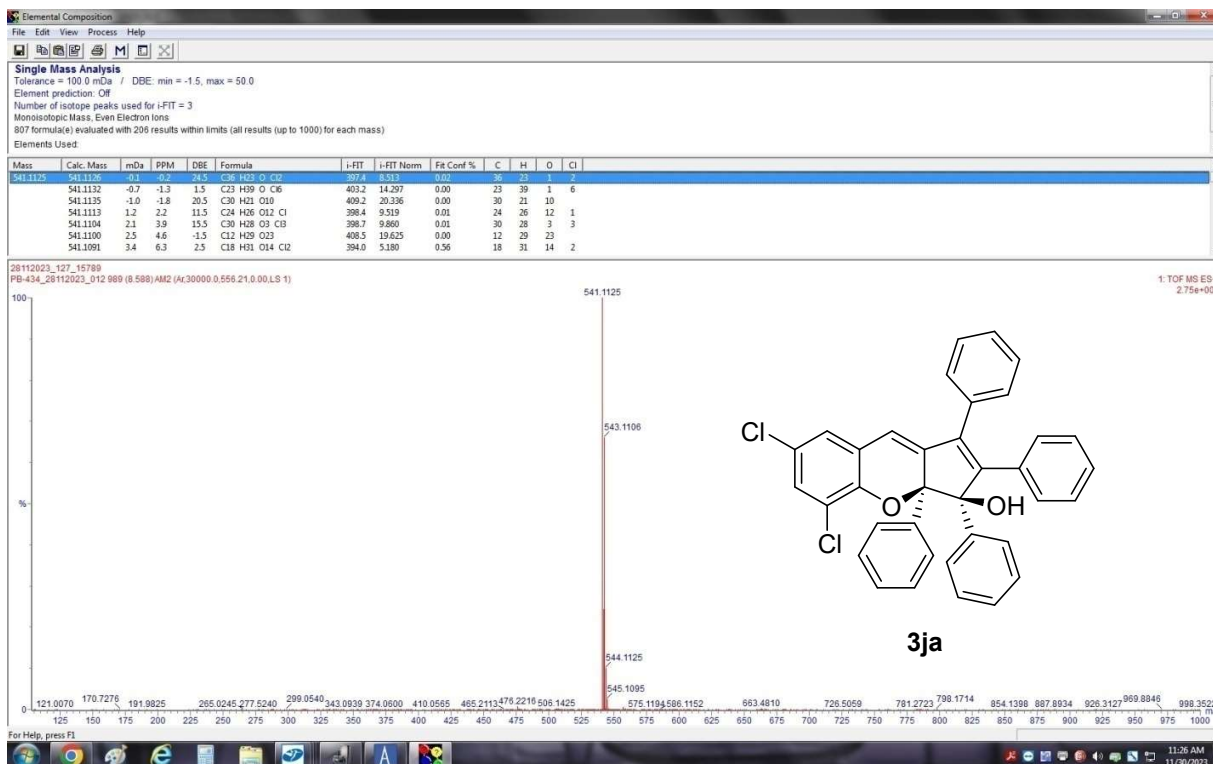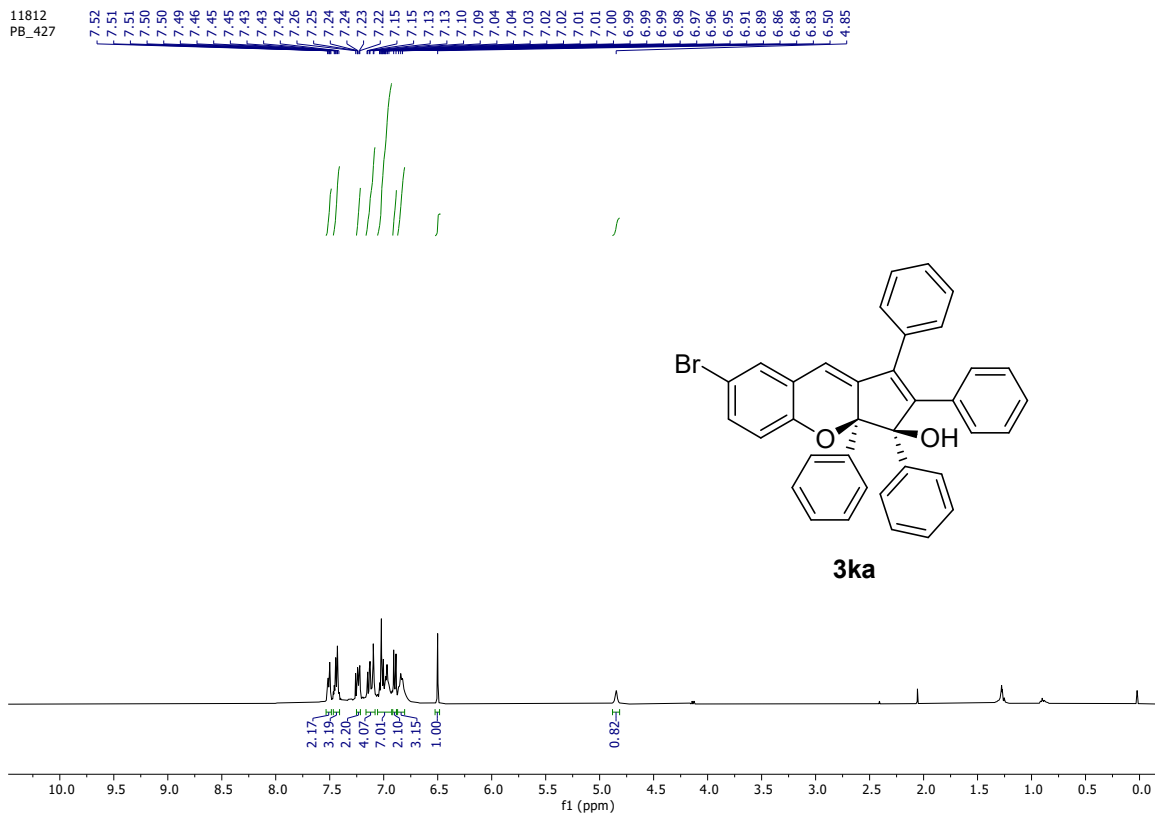

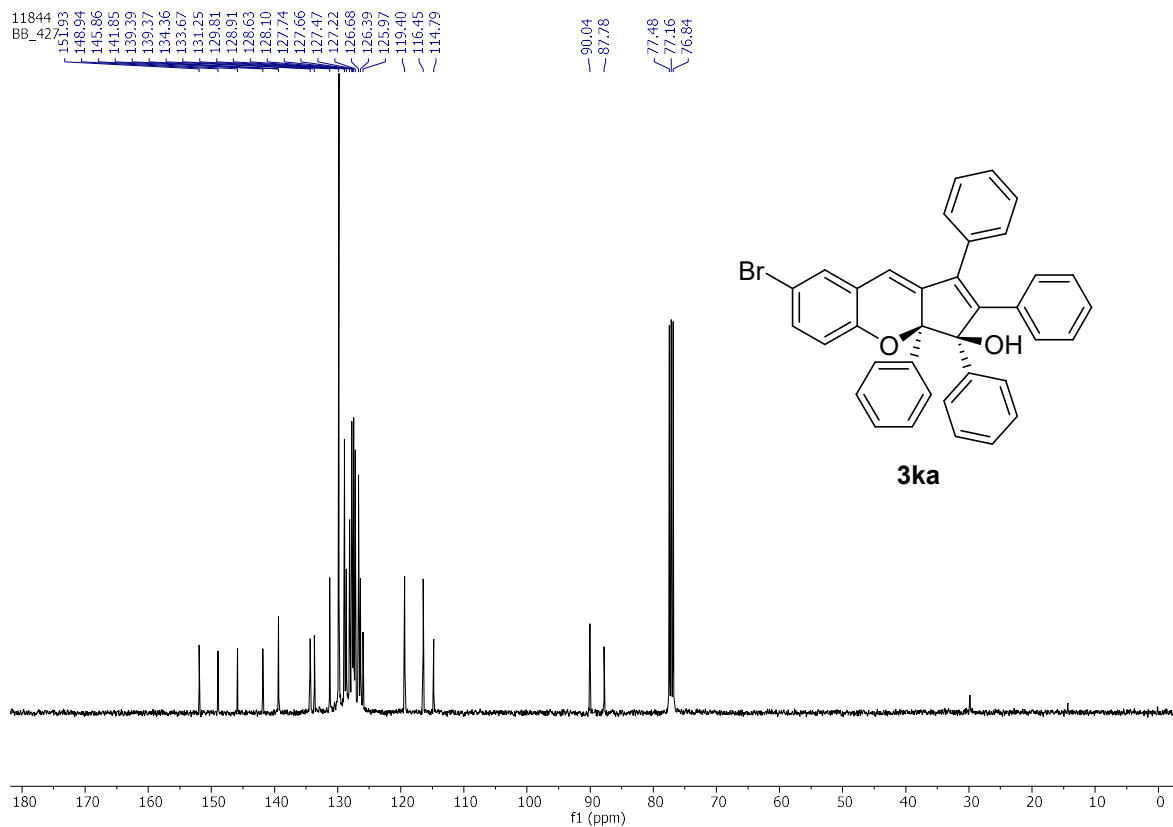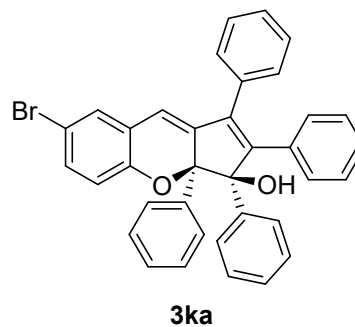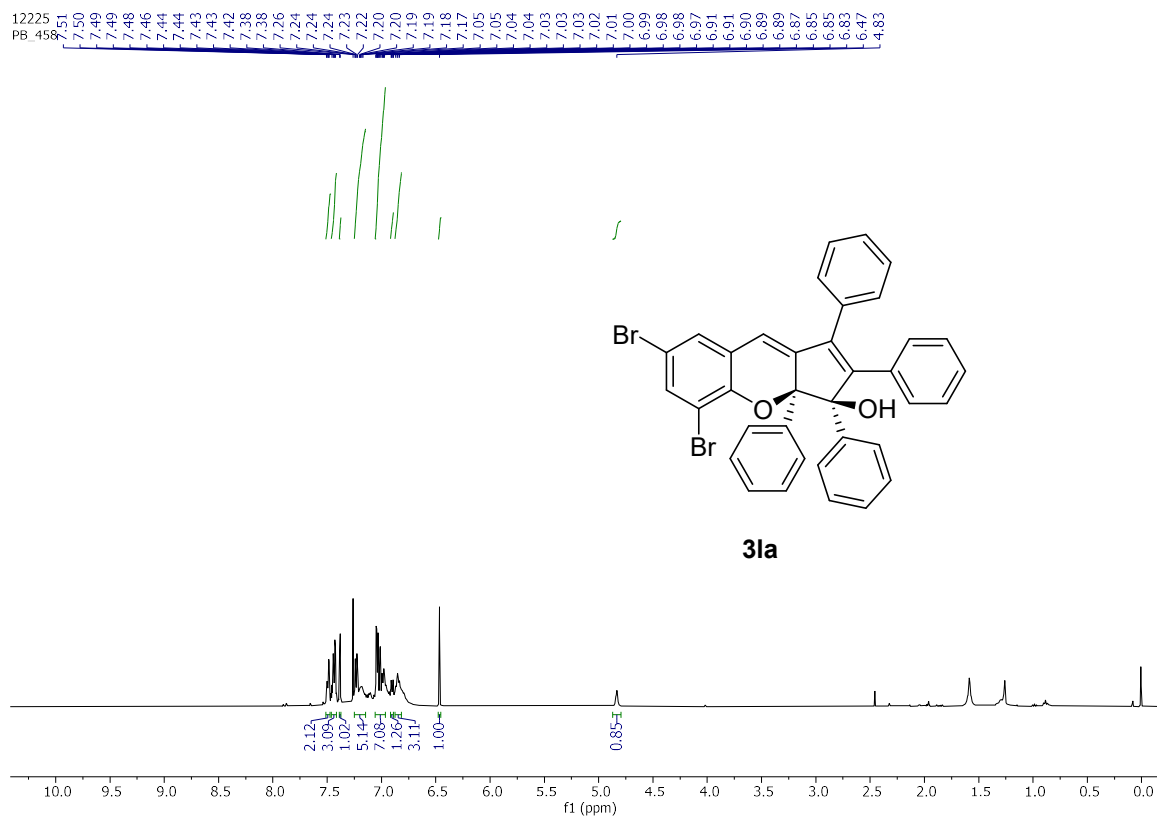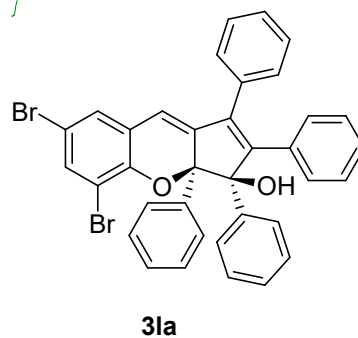

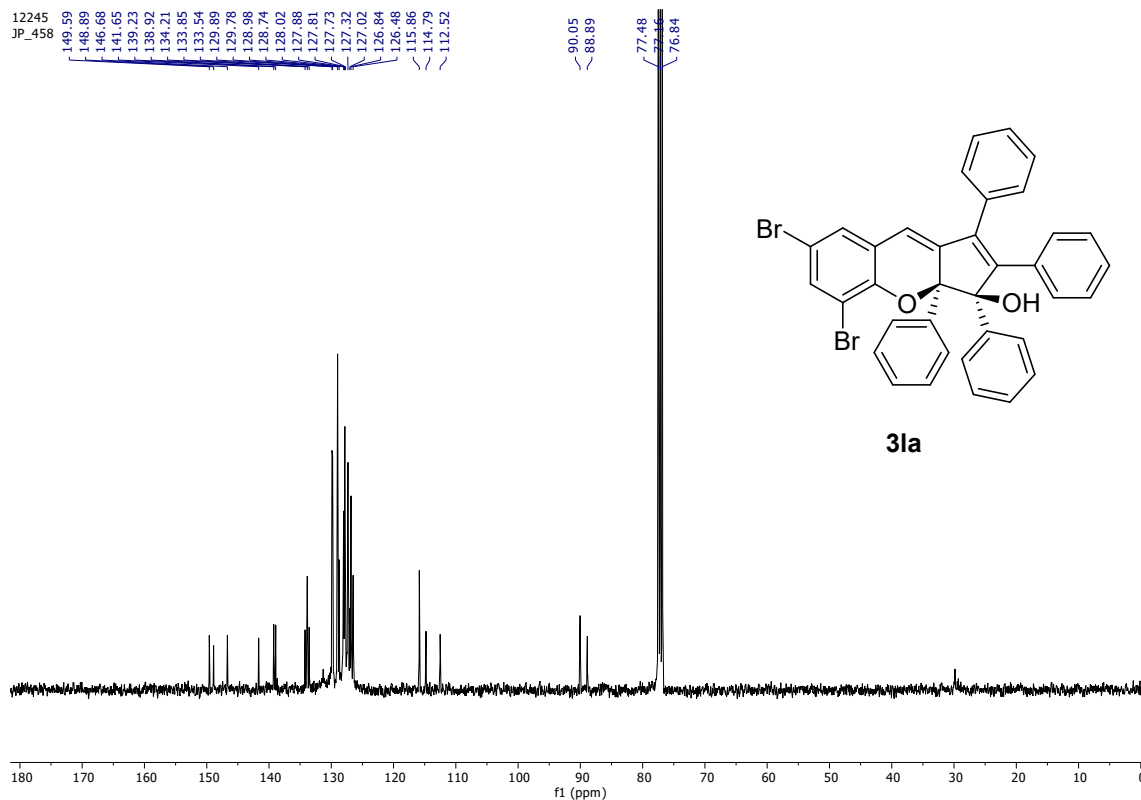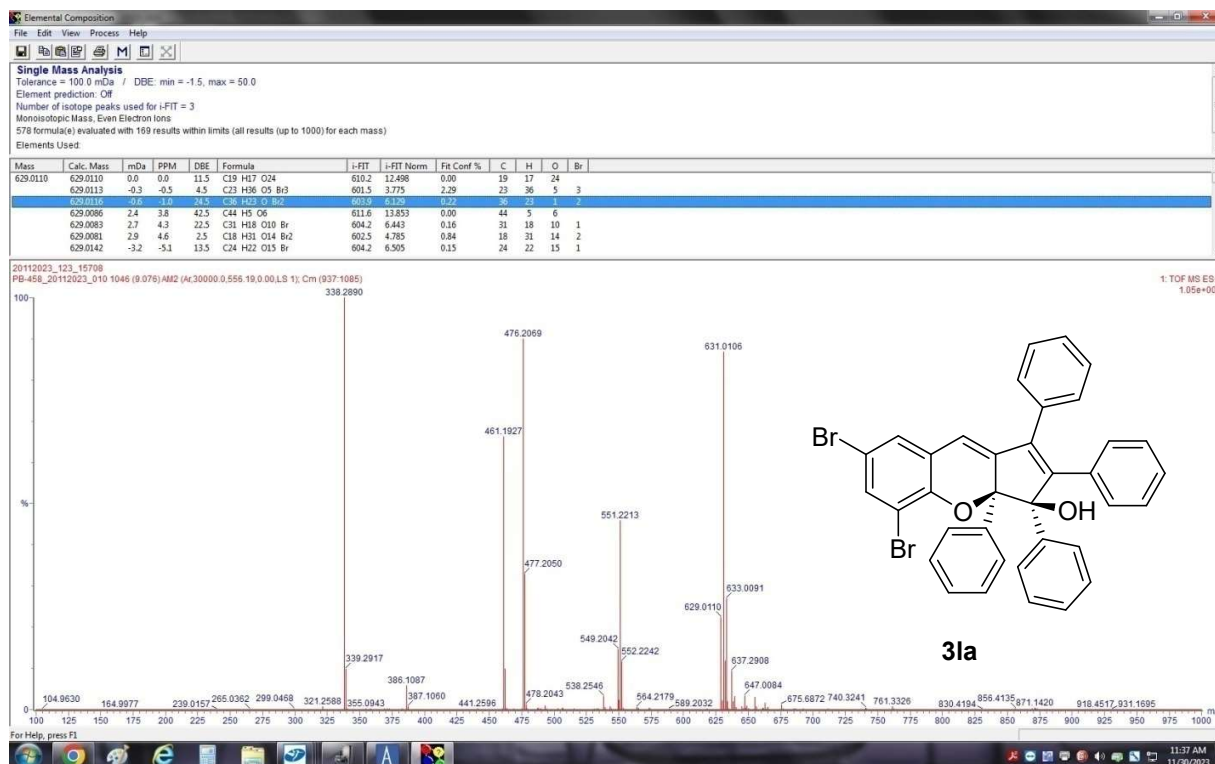



42793.1.f1  
42793  
PB\_493

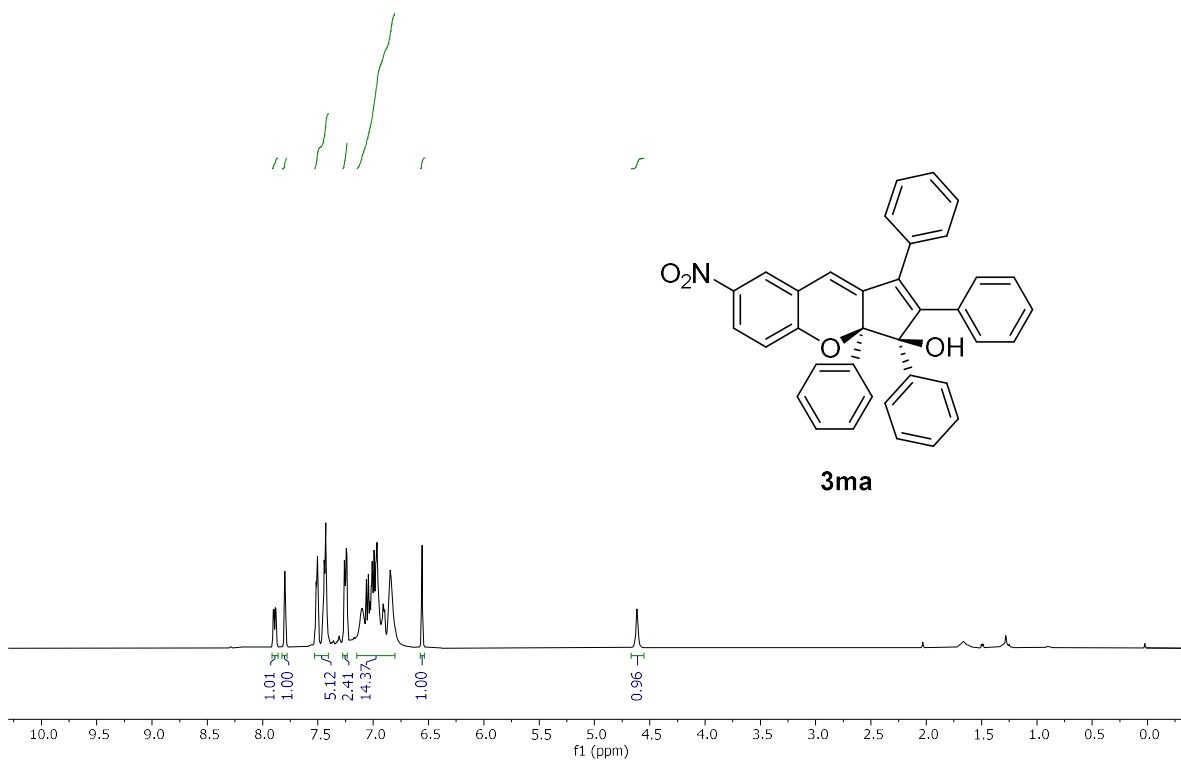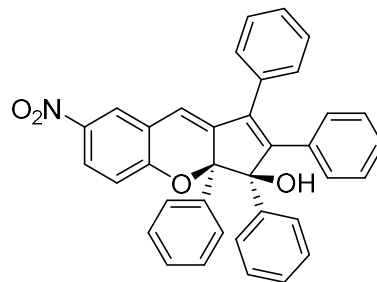

**3ma**

13530  
PB\_493

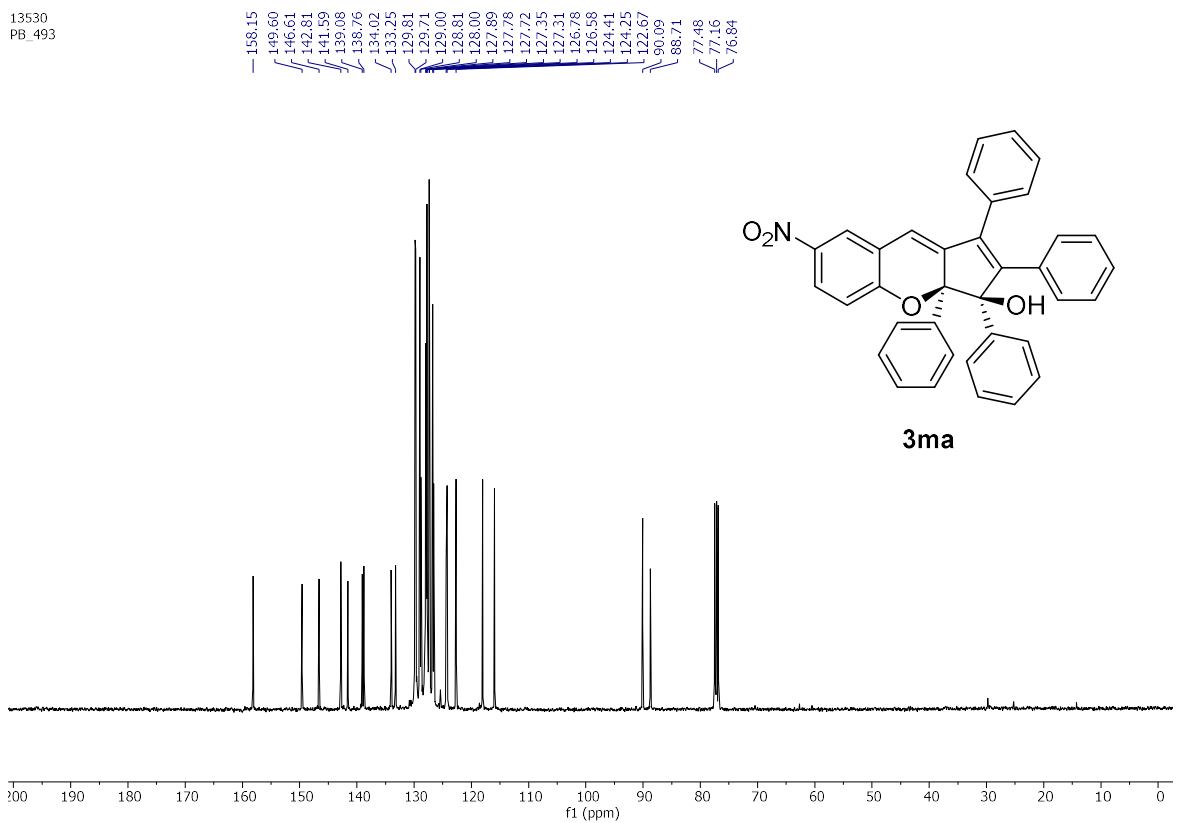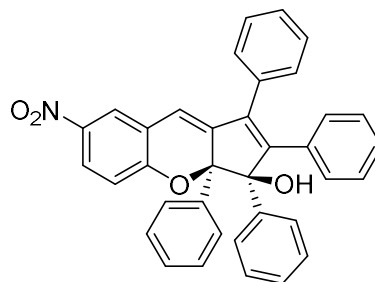

**3ma**

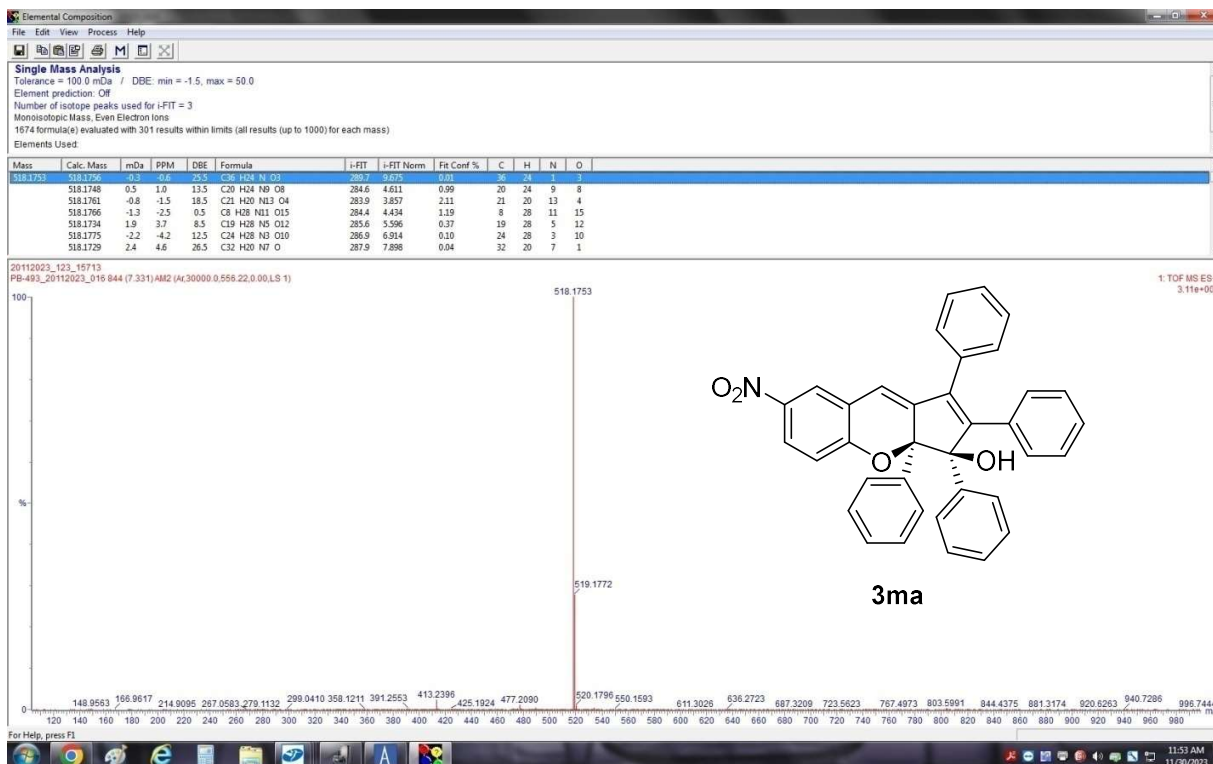

42864.116  
 42864  
 PB-492

7.86  
7.85  
7.82  
7.75  
7.74  
7.73  
7.71  
7.70  
7.68  
7.67  
7.66  
7.64  
7.61  
7.59  
7.58  
7.57  
7.51  
7.50  
7.48  
7.47  
7.45  
7.44  
7.42  
7.41  
7.39  
7.38  
7.37  
7.29  
7.28  
7.26  
7.25  
7.24  
7.23  
7.22  
7.21  
7.18  
7.18  
7.02  
7.01  
6.99  
6.90  
6.88  
6.84  
5.06

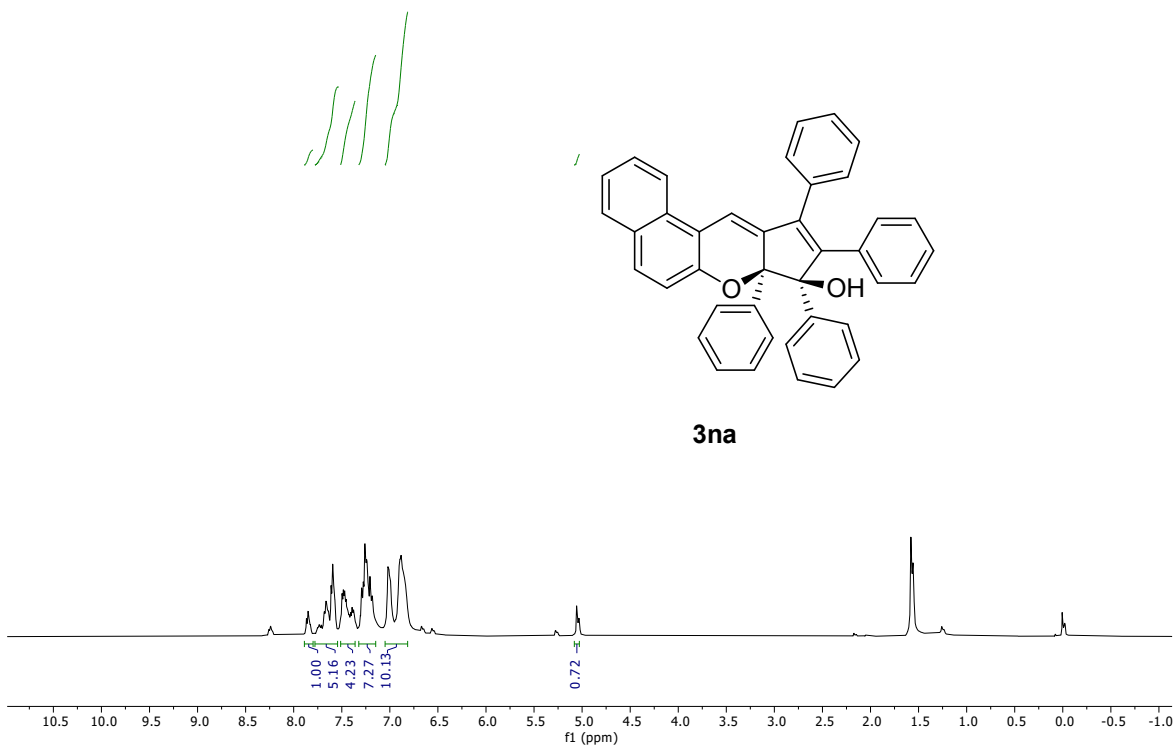

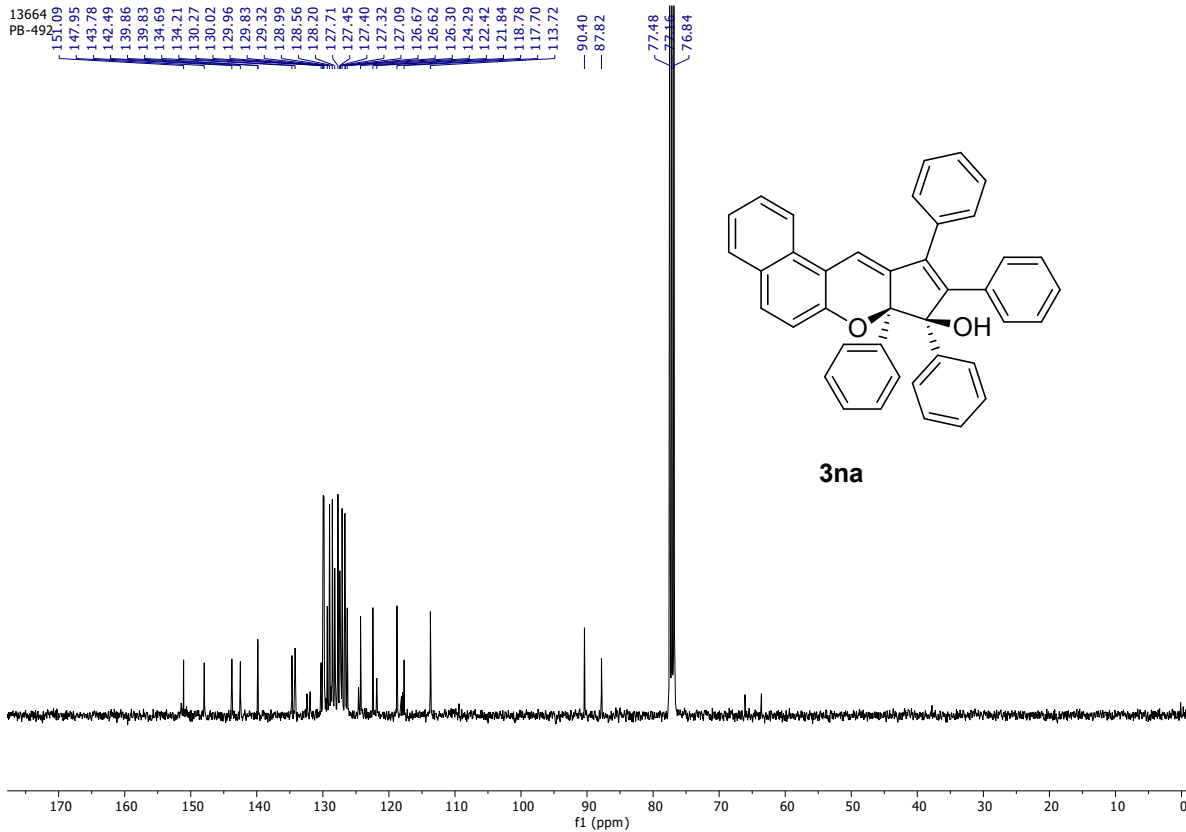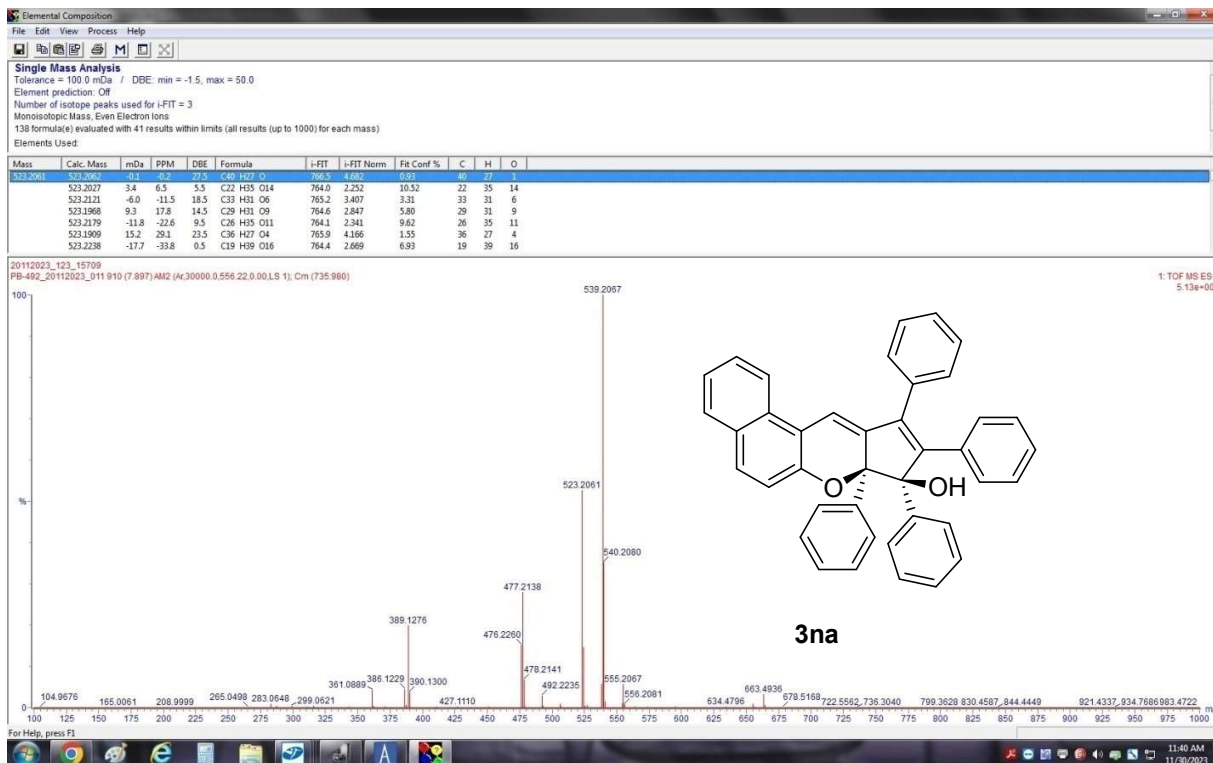

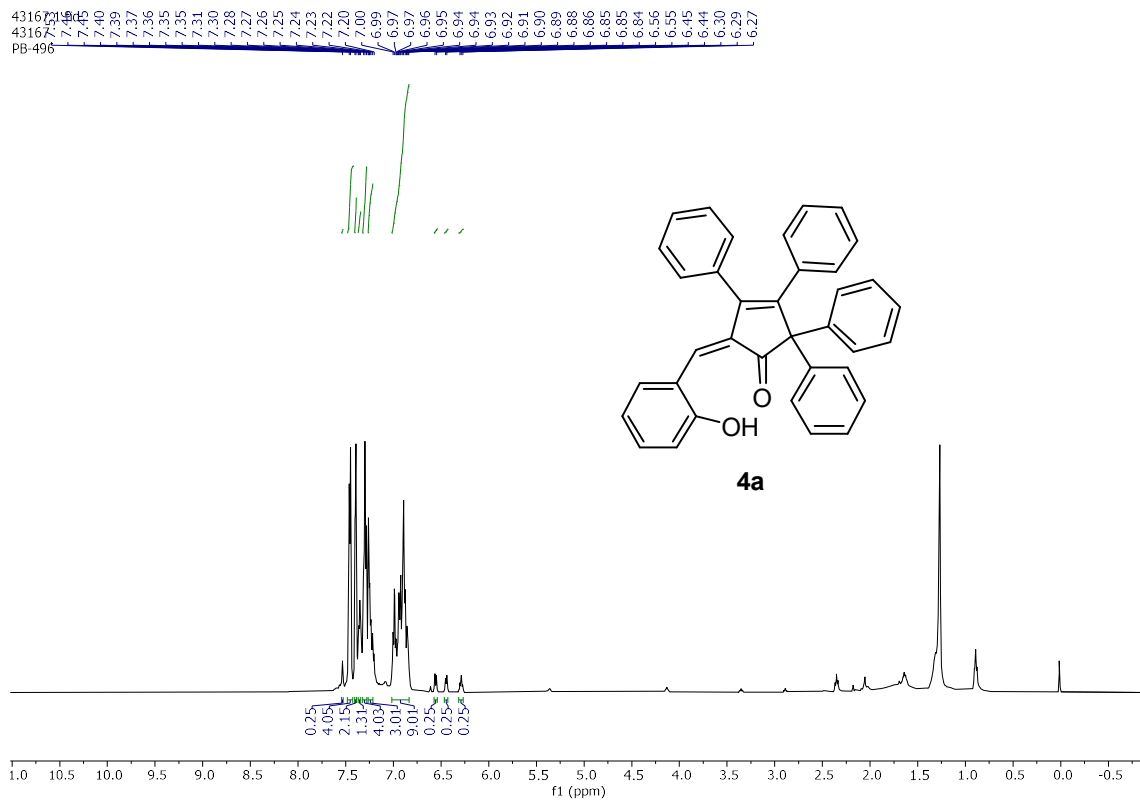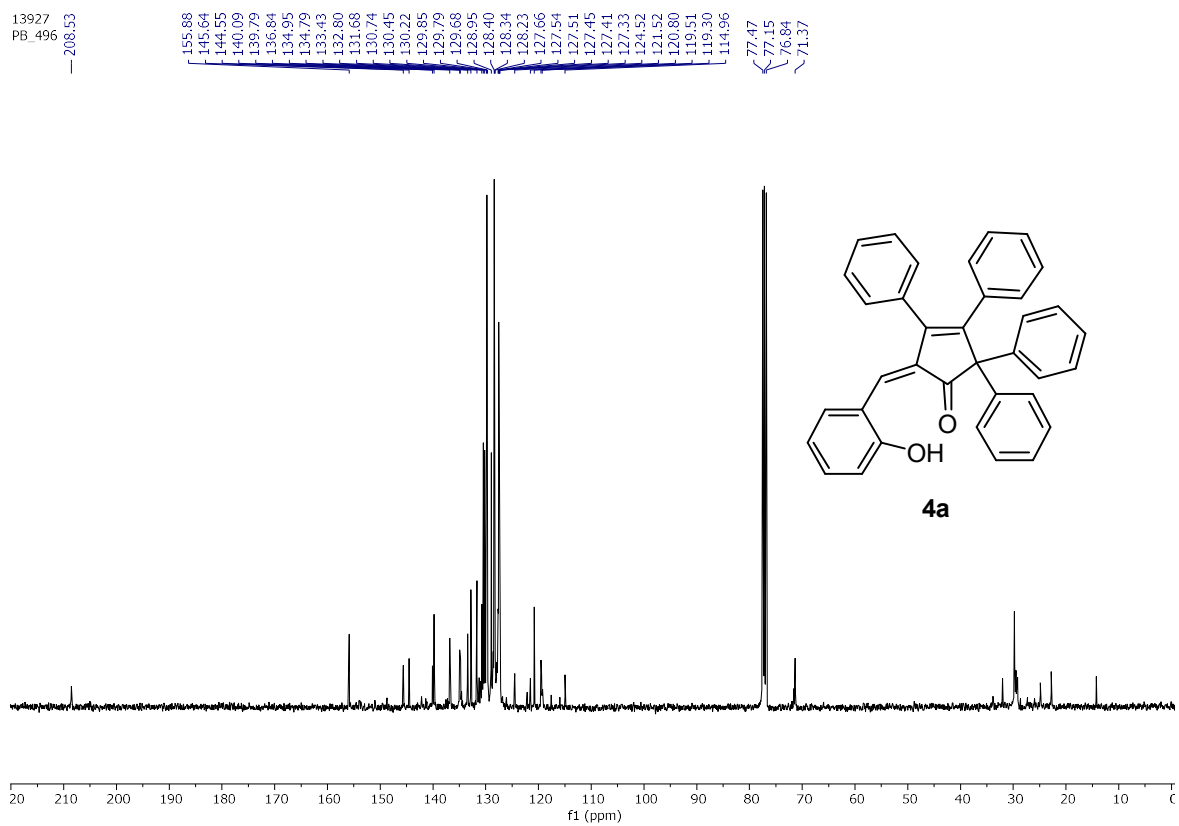

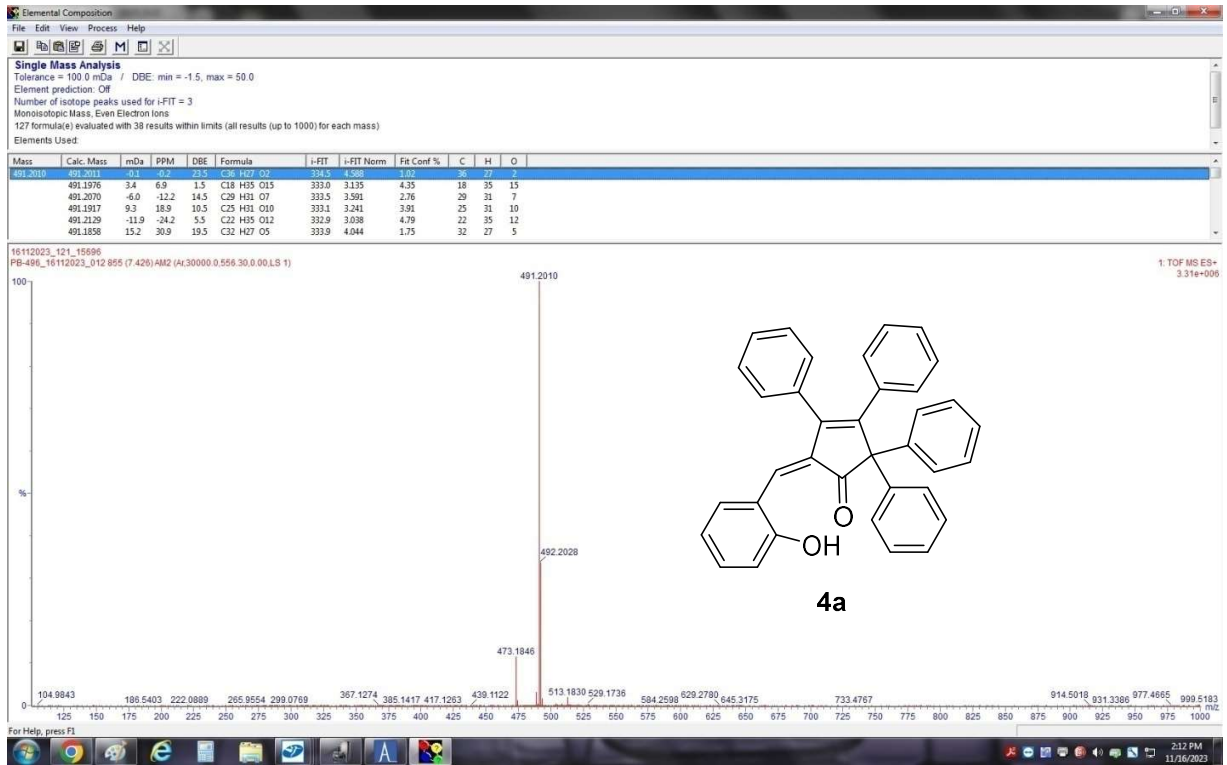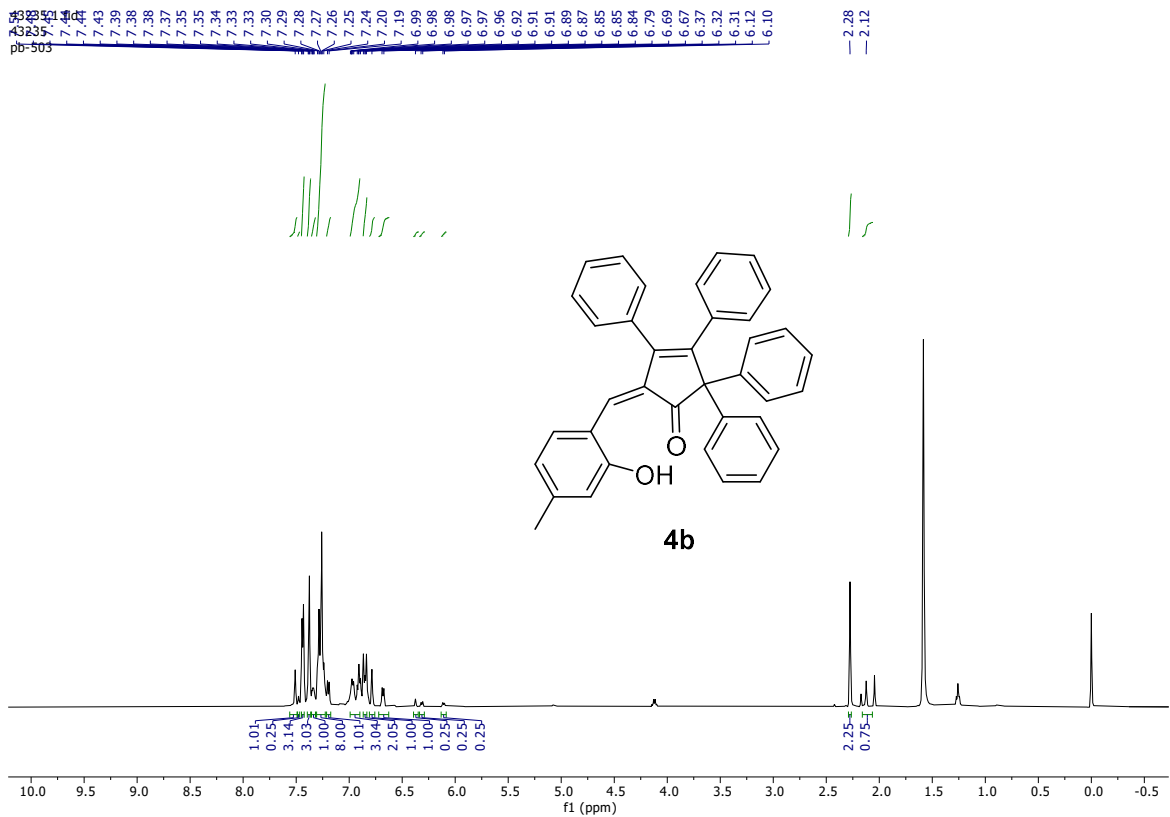

13887  
PB\_503

208.47

155.93  
145.88  
145.82  
143.79  
142.85  
140.19  
139.95  
139.89  
135.79  
135.08  
134.94  
134.88  
133.44  
133.26  
133.26  
130.72  
130.44  
130.40  
130.24  
130.20  
129.86  
129.80  
129.75  
128.93  
128.89  
128.38  
128.34  
128.26  
128.14  
127.74  
127.49  
127.45  
127.29  
127.15  
121.79  
121.65  
119.93  
119.71  
119.50  
118.61  
115.61  
77.48  
77.16  
76.84  
71.40  
71.36  
21.43

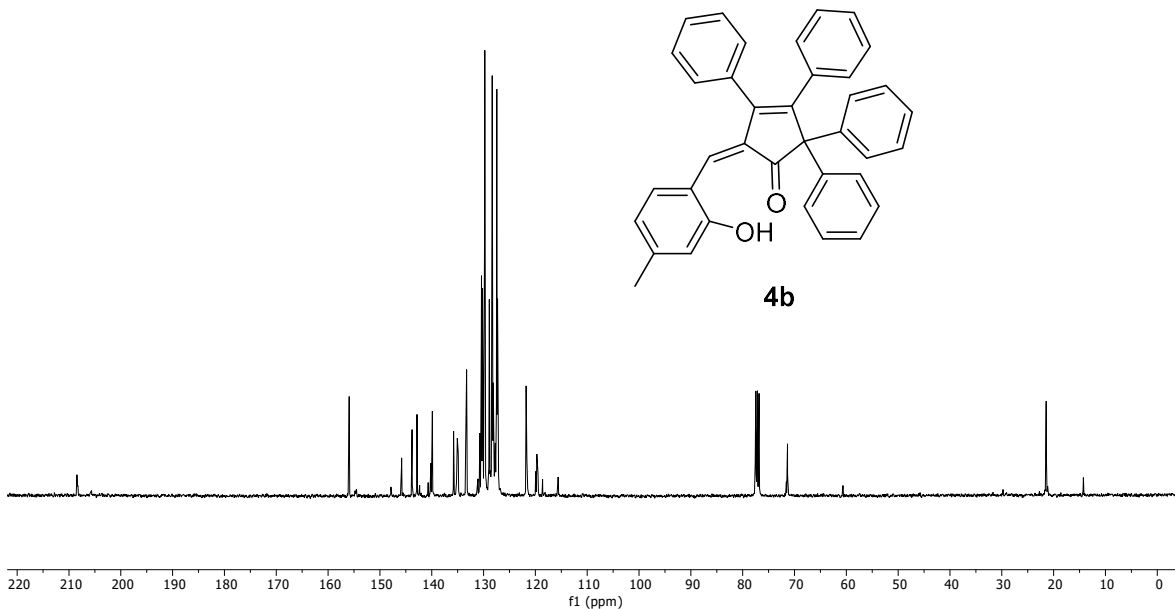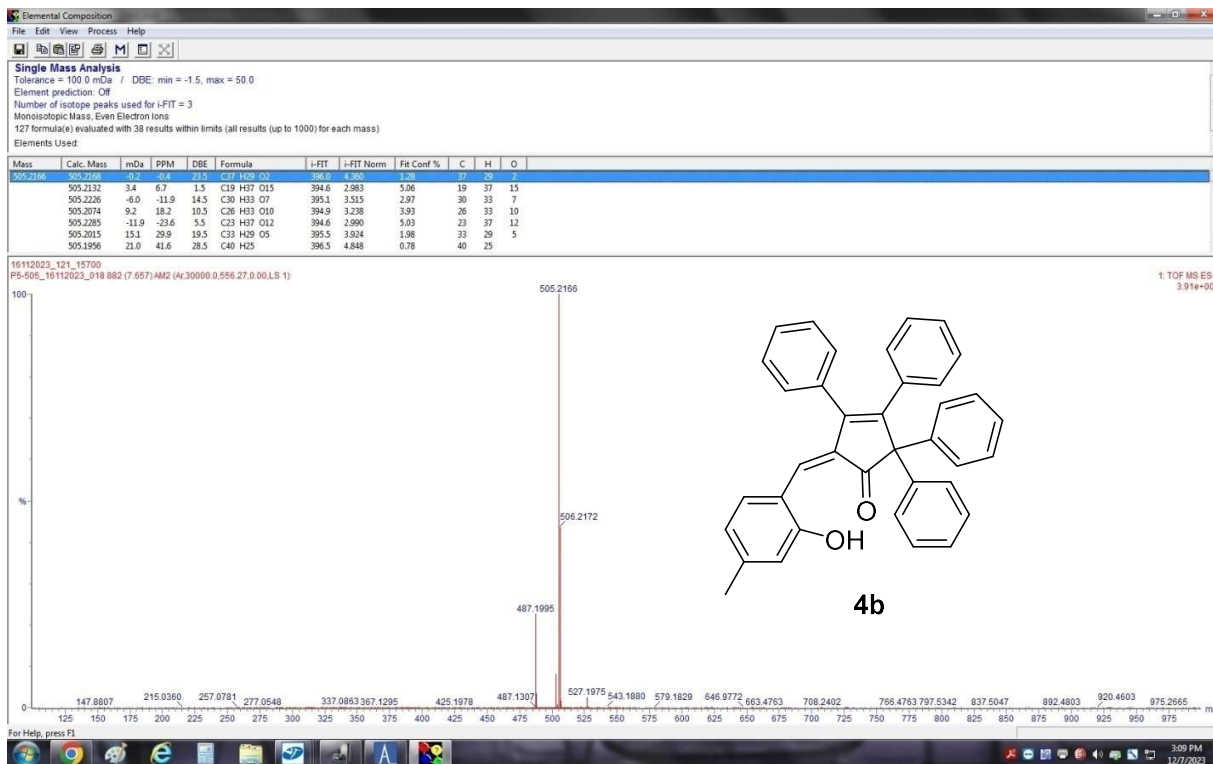

5.98  
5.83  
5.77  
7.44  
7.43  
7.42  
7.39  
7.38  
7.37  
7.36  
7.30  
7.29  
7.28  
7.26  
7.20  
7.17  
7.16  
7.15  
7.14  
7.14  
7.08  
7.07  
7.07  
7.02  
7.01  
6.99  
6.97  
6.93  
6.92  
6.90  
6.89  
6.88  
6.87  
6.85  
6.84  
6.83  
6.73  
6.52  
6.51  
6.49  
6.36

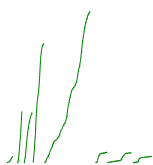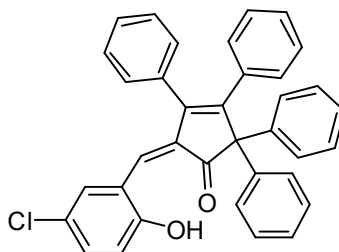

**4c**

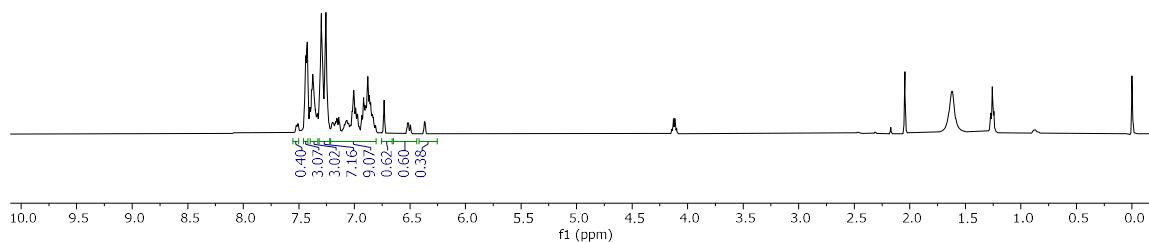

14207  
PB.510

208.59  
205.05  
154.38  
152.73  
149.42  
145.43  
145.32  
139.88  
139.49  
138.02  
137.57  
134.65  
134.52  
132.19  
131.23  
131.12  
130.76  
130.46  
130.35  
130.13  
130.07  
129.83  
129.78  
129.66  
129.54  
129.41  
129.08  
128.72  
128.64  
128.48  
128.41  
128.05  
127.79  
127.69  
127.65  
127.61  
127.57  
127.53  
127.38  
126.91  
126.18  
125.82  
125.94  
124.27  
123.62  
122.84  
120.86  
116.19  
114.87  
77.48  
77.16  
76.84  
71.50  
71.37

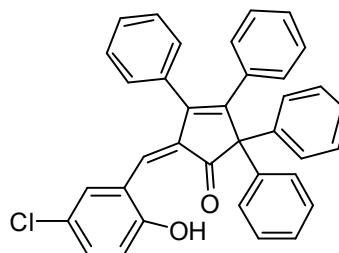

**4c**

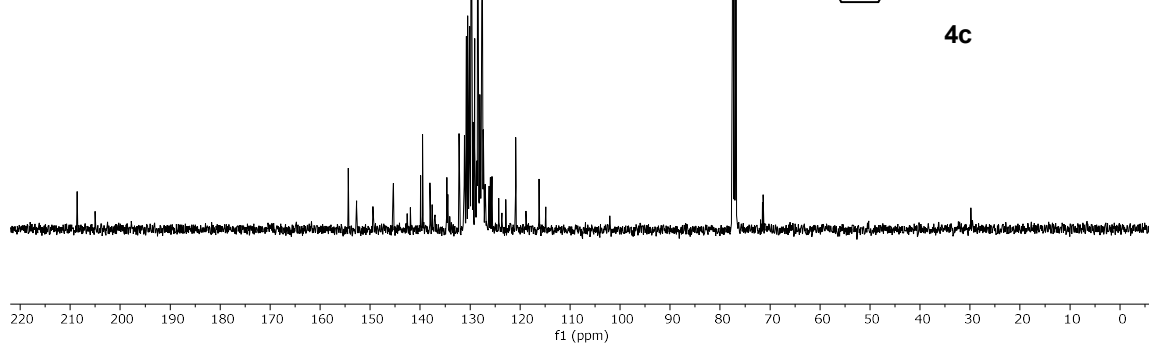

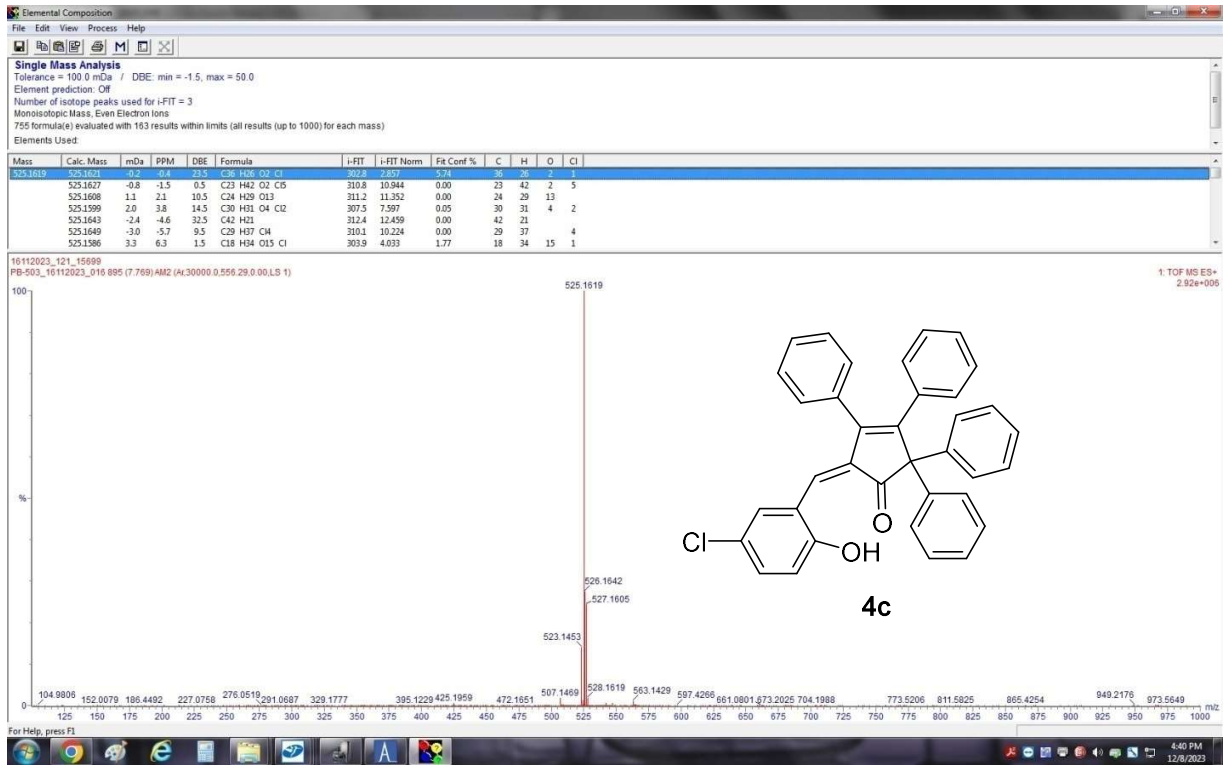

9.289  
7.166  
7.145  
7.144  
7.44  
7.43  
7.40  
7.38  
7.36  
7.35  
7.34  
7.34  
7.33  
7.31  
7.30  
7.29  
7.28  
7.28  
7.26  
7.25  
7.08  
7.07  
7.04  
7.03  
6.98  
6.97  
6.96  
6.96  
6.95  
6.93  
6.92  
6.91  
6.90  
6.89  
6.88  
6.86  
6.84  
6.78  
6.77  
6.76  
6.46  
6.45  
6.43

SH-511

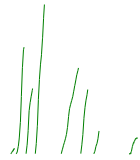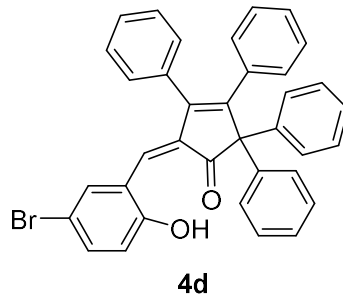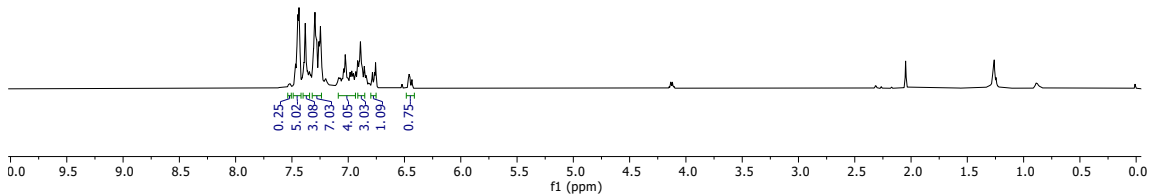



13959  
PB\_511  
— 208.49  
— 205.37

154.85  
163.42  
149.31  
145.43  
145.30  
141.96  
139.87  
139.47  
138.03  
137.33  
135.05  
134.71  
134.65  
134.51  
134.46  
133.96  
133.74  
132.49  
130.74  
130.63  
130.46  
130.12  
130.06  
130.06  
129.83  
129.78  
129.37  
128.07  
128.48  
128.41  
128.15  
128.01  
127.89  
127.69  
127.65  
127.57  
127.53  
127.38  
126.41  
123.31  
121.14  
116.65  
112.85  
111.42  
77.48  
77.16  
76.84  
71.51  
71.37

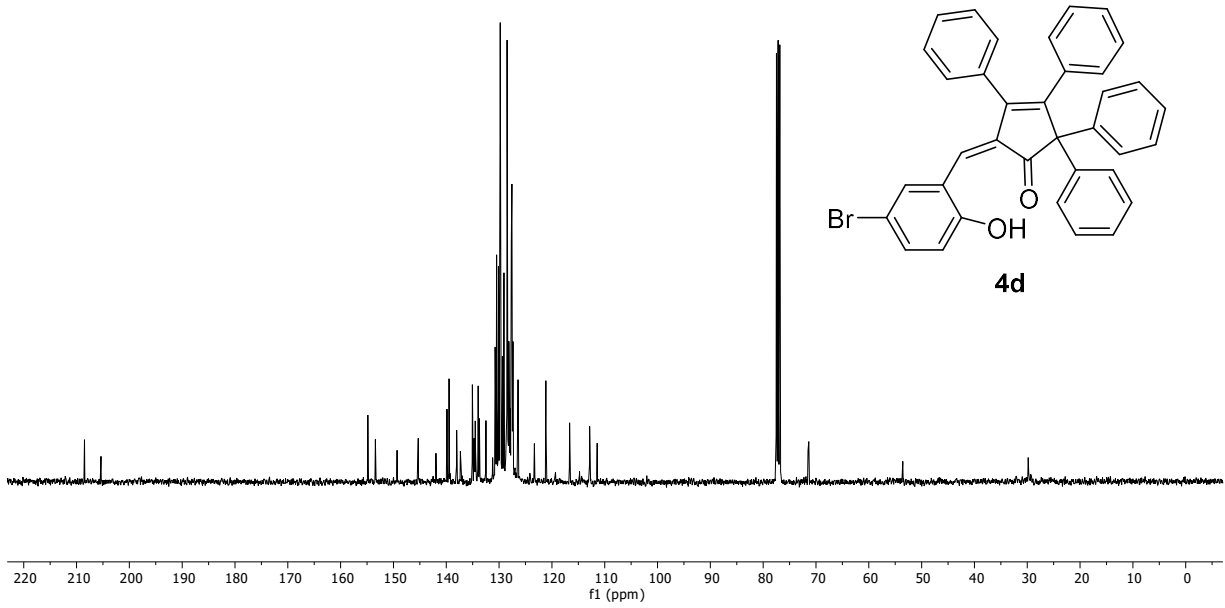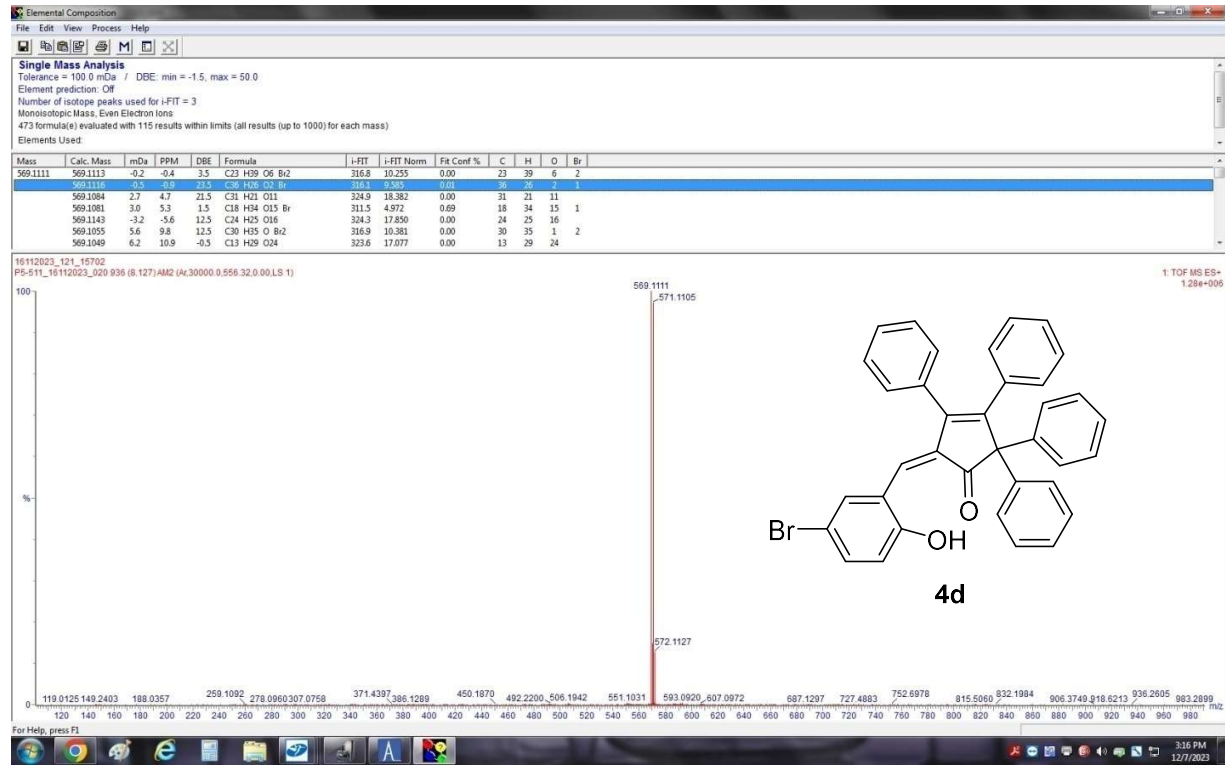

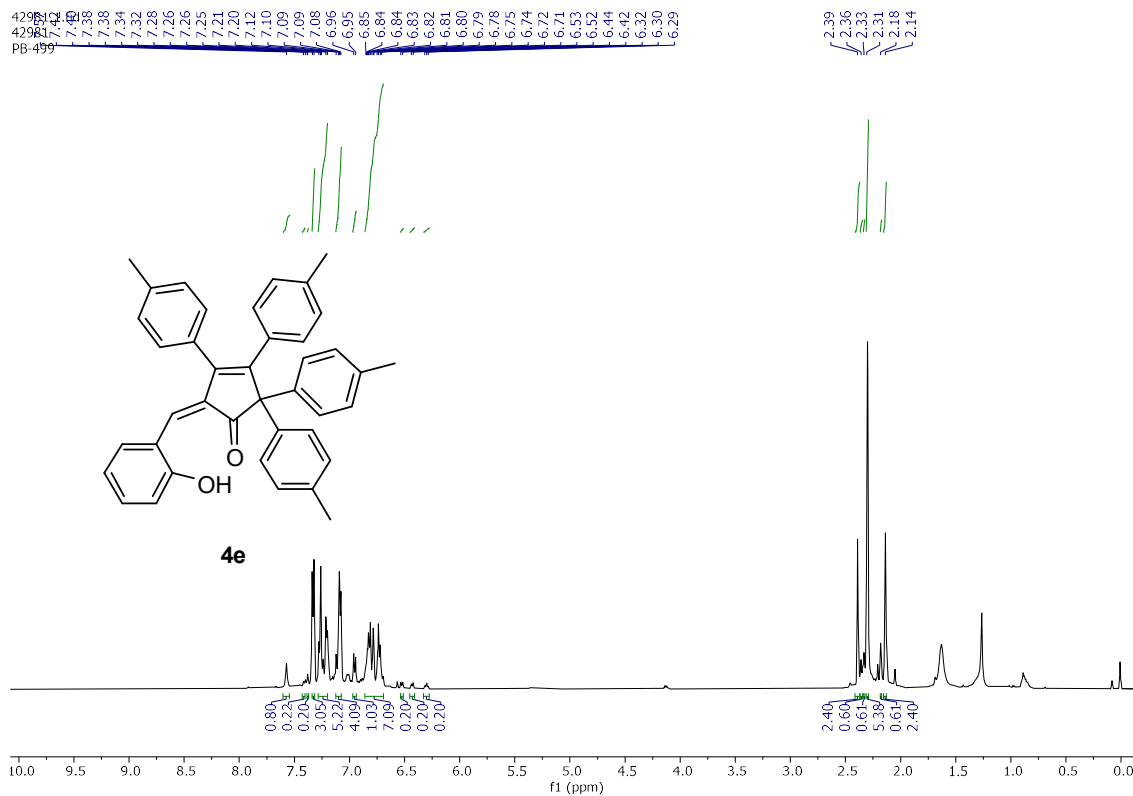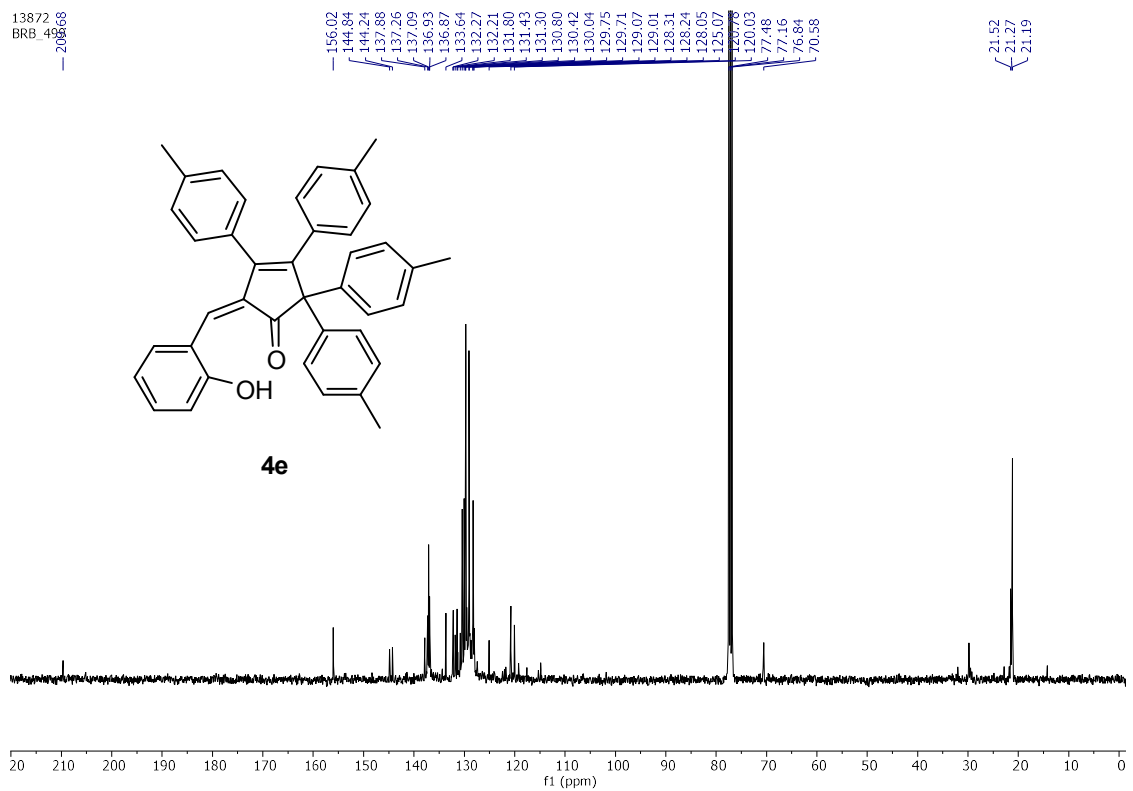

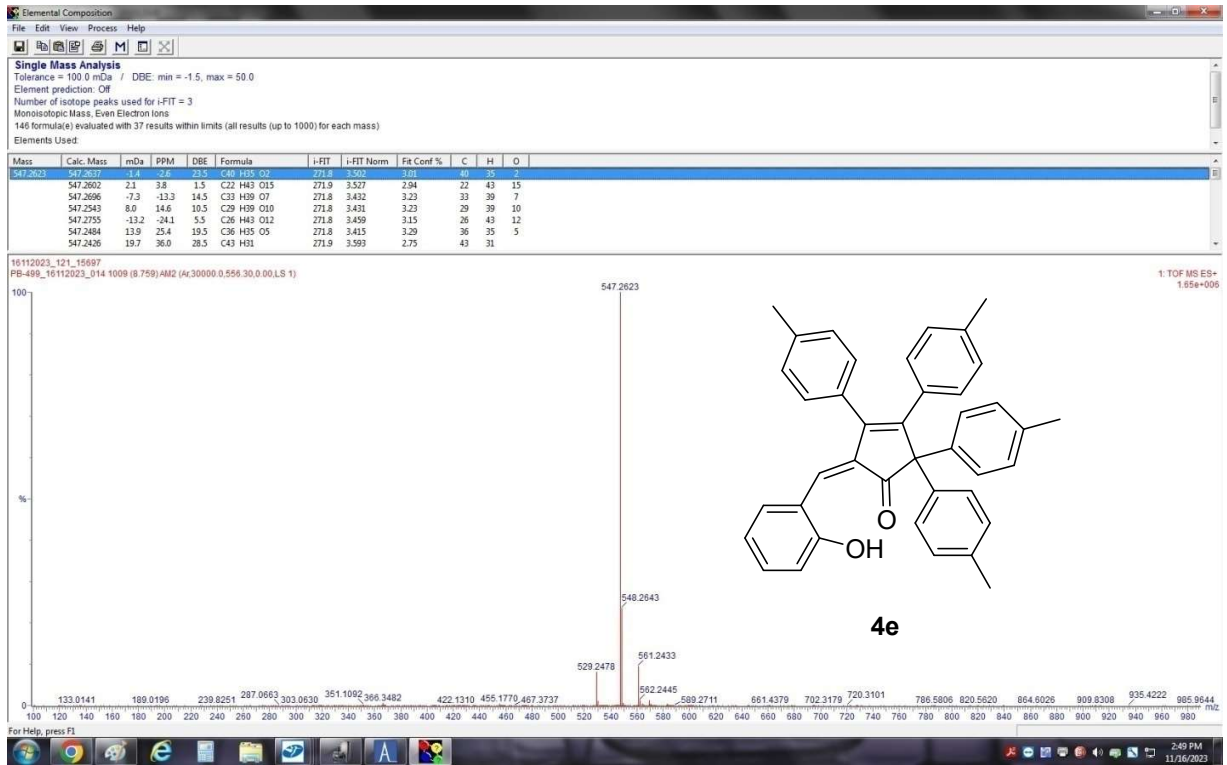

92.9801, 91.936, 7.35, 7.35, 7.34, 7.34, 7.33, 7.26, 7.24, 7.23, 7.21, 7.12, 7.10, 7.09, 7.01, 7.01, 7.00, 6.99, 6.98, 6.97, 6.95, 6.94, 6.93, 6.92, 6.92, 6.90, 6.90, 6.88, 6.82, 6.81, 6.80, 6.79, 6.78, 6.77, 6.77, 6.76, 6.69, 6.67, 6.67, 6.66, 6.66, 6.65, 6.64, 6.64, 6.58, 6.56, 6.43, 6.41, 6.37, 6.35, 6.34

PB-502

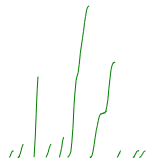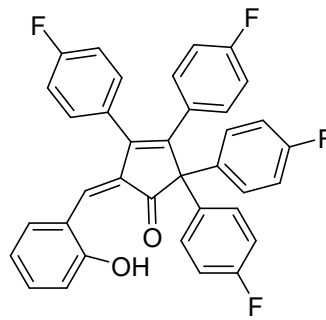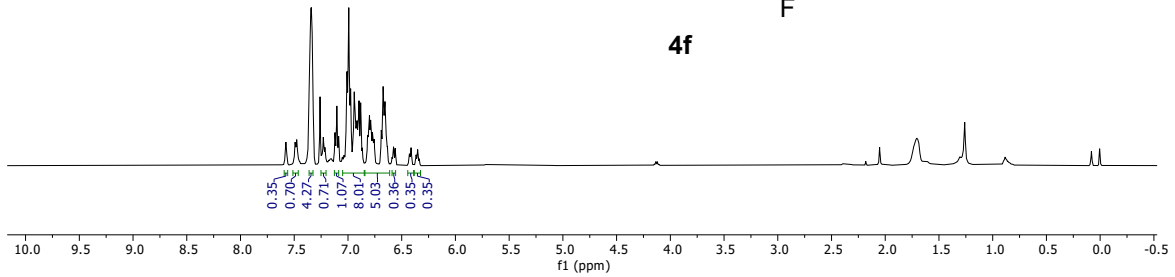

13868  
PS\_502  
— 206.88

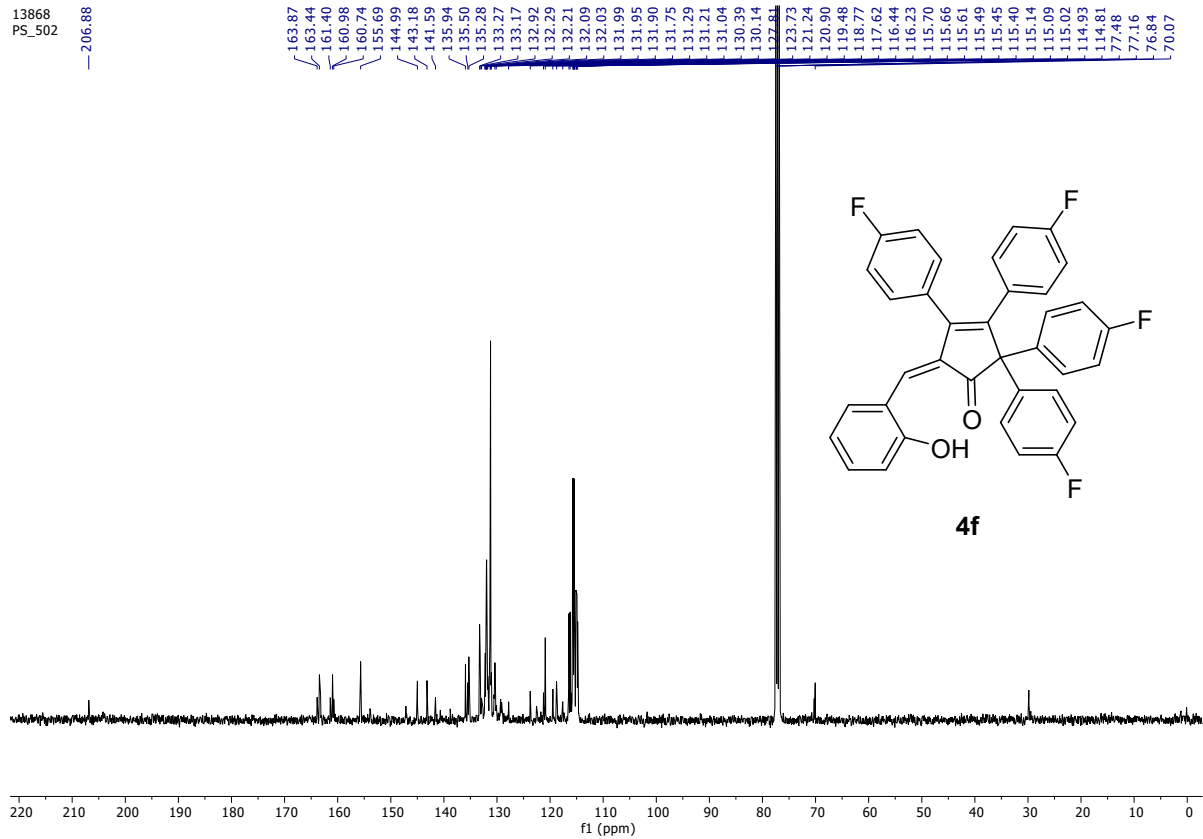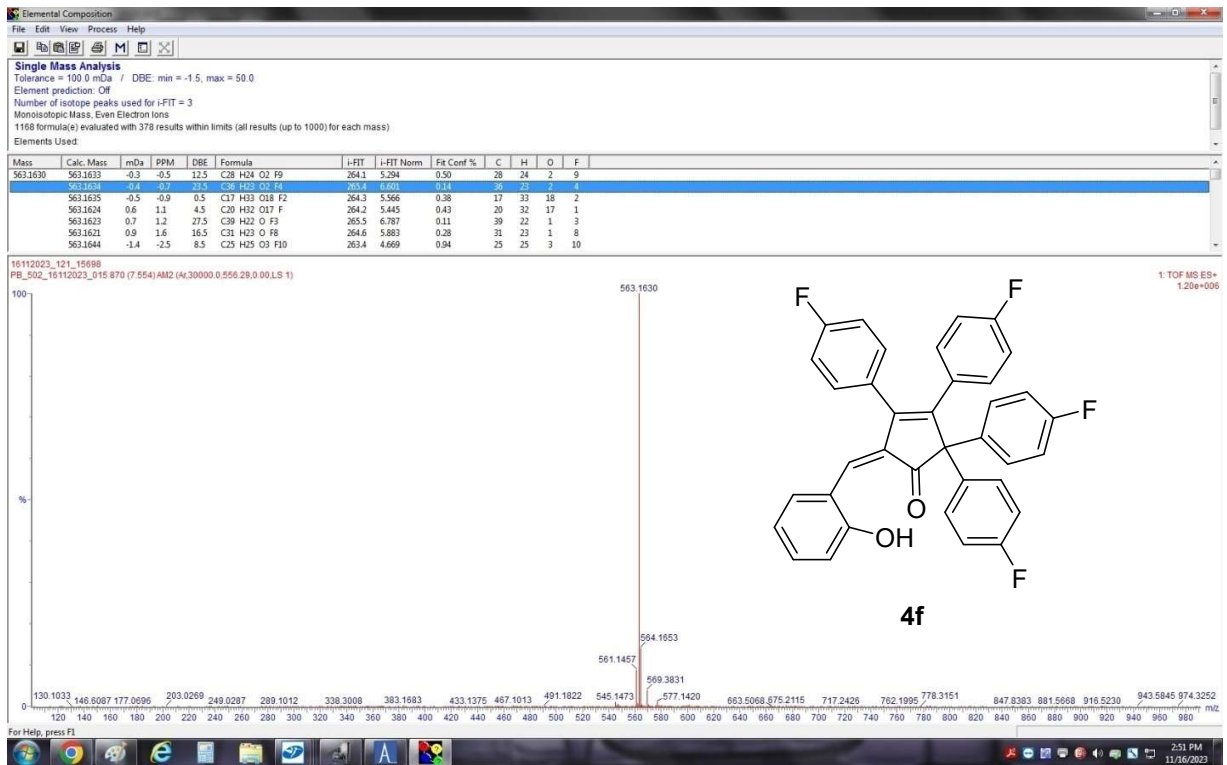

7.36  
7.33  
7.32  
7.31  
7.30  
7.29  
7.28  
7.27  
7.26  
7.24  
7.21  
7.20  
7.18  
7.10  
7.09  
7.00  
7.00  
6.98  
6.97  
6.95  
6.94  
6.92  
6.92  
6.91  
6.90  
6.88  
6.86  
6.85  
6.83  
6.74  
6.74  
6.73  
6.72  
6.71  
6.71  
6.69  
6.69  
6.57  
6.55  
6.53  
6.39  
6.37  
6.35  
6.34  
6.32

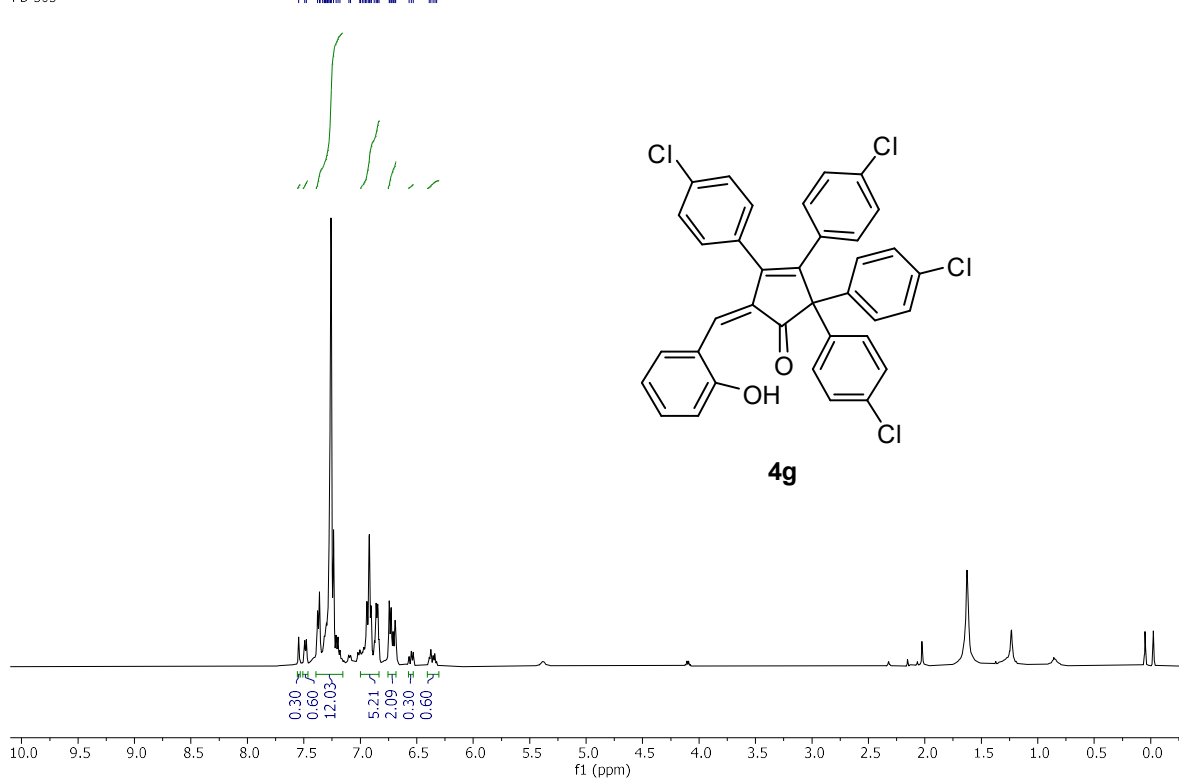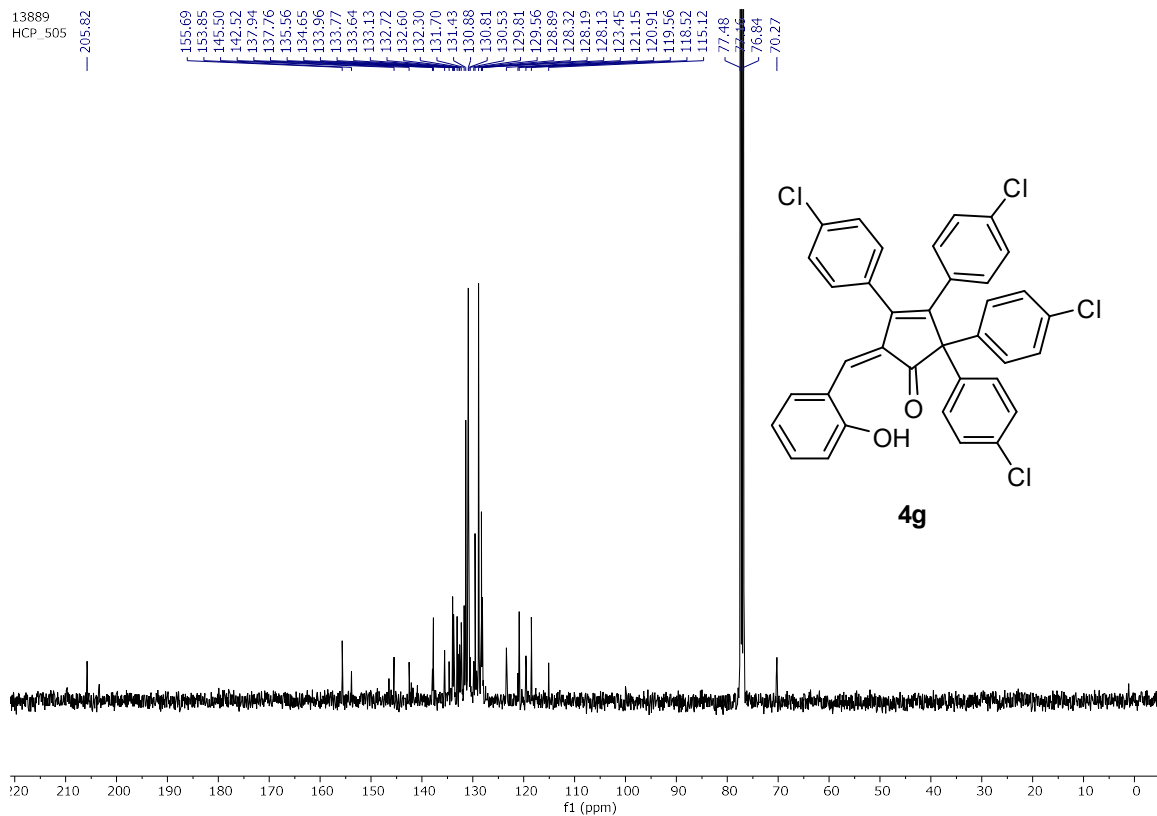

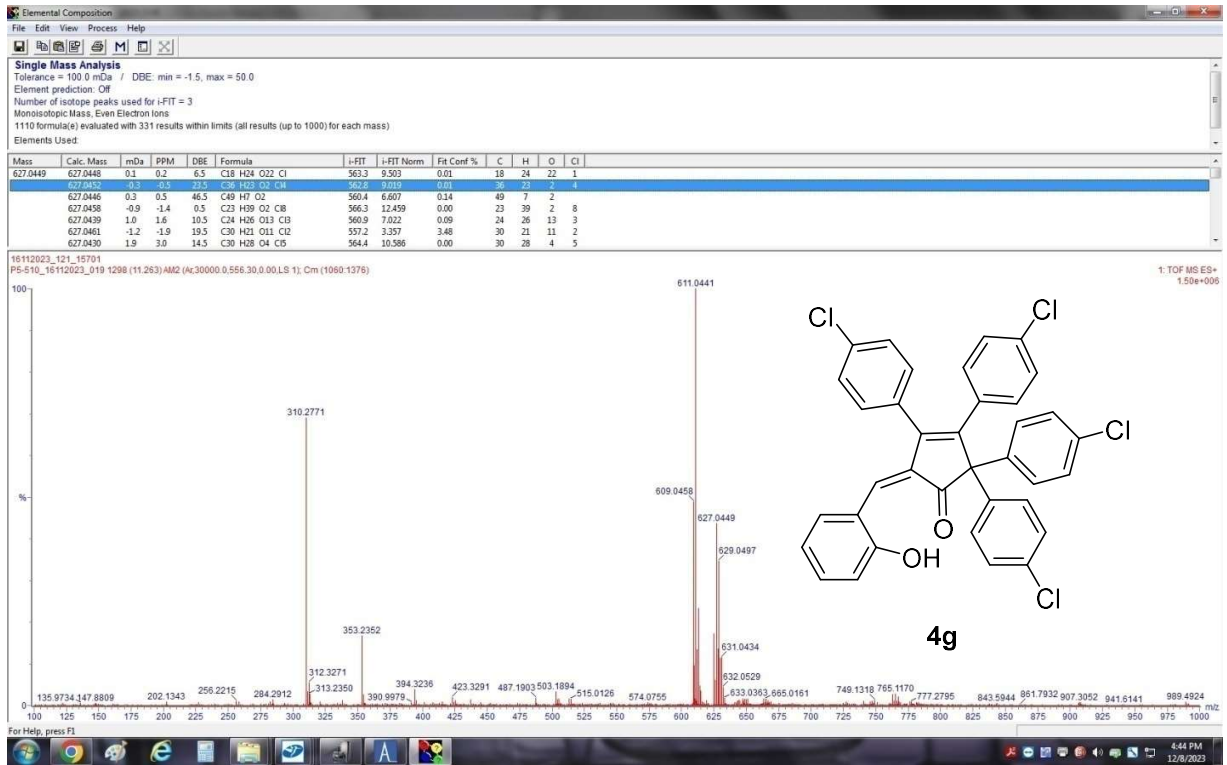

100.00  
99.99  
99.98  
99.97  
99.96  
99.95  
99.94  
99.93  
99.92  
99.91  
99.90  
99.89  
99.88  
99.87  
99.86  
99.85  
99.84  
99.83  
99.82  
99.81  
99.80  
99.79  
99.78  
99.77  
99.76  
99.75  
99.74  
99.73  
99.72  
99.71  
99.70  
99.69  
99.68  
99.67  
99.66  
99.65  
99.64  
99.63  
99.62  
99.61  
99.60  
99.59  
99.58  
99.57  
99.56  
99.55  
99.54  
99.53  
99.52  
99.51  
99.50  
99.49  
99.48  
99.47  
99.46  
99.45  
99.44  
99.43  
99.42  
99.41  
99.40  
99.39  
99.38  
99.37  
99.36  
99.35  
99.34  
99.33  
99.32  
99.31  
99.30  
99.29  
99.28  
99.27  
99.26  
99.25  
99.24  
99.23  
99.22  
99.21  
99.20  
99.19  
99.18  
99.17  
99.16  
99.15  
99.14  
99.13  
99.12  
99.11  
99.10  
99.09  
99.08  
99.07  
99.06  
99.05  
99.04  
99.03  
99.02  
99.01  
99.00  
98.99  
98.98  
98.97  
98.96  
98.95  
98.94  
98.93  
98.92  
98.91  
98.90  
98.89  
98.88  
98.87  
98.86  
98.85  
98.84  
98.83  
98.82  
98.81  
98.80  
98.79  
98.78  
98.77  
98.76  
98.75  
98.74  
98.73  
98.72  
98.71  
98.70  
98.69  
98.68  
98.67  
98.66  
98.65  
98.64  
98.63  
98.62  
98.61  
98.60  
98.59  
98.58  
98.57  
98.56  
98.55  
98.54  
98.53  
98.52  
98.51  
98.50  
98.49  
98.48  
98.47  
98.46  
98.45  
98.44  
98.43  
98.42  
98.41  
98.40  
98.39  
98.38  
98.37  
98.36  
98.35  
98.34  
98.33  
98.32  
98.31  
98.30  
98.29  
98.28  
98.27  
98.26  
98.25  
98.24  
98.23  
98.22  
98.21  
98.20  
98.19  
98.18  
98.17  
98.16  
98.15  
98.14  
98.13  
98.12  
98.11  
98.10  
98.09  
98.08  
98.07  
98.06  
98.05  
98.04  
98.03  
98.02  
98.01  
98.00  
97.99  
97.98  
97.97  
97.96  
97.95  
97.94  
97.93  
97.92  
97.91  
97.90  
97.89  
97.88  
97.87  
97.86  
97.85  
97.84  
97.83  
97.82  
97.81  
97.80  
97.79  
97.78  
97.77  
97.76  
97.75  
97.74  
97.73  
97.72  
97.71  
97.70  
97.69  
97.68  
97.67  
97.66  
97.65  
97.64  
97.63  
97.62  
97.61  
97.60  
97.59  
97.58  
97.57  
97.56  
97.55  
97.54  
97.53  
97.52  
97.51  
97.50  
97.49  
97.48  
97.47  
97.46  
97.45  
97.44  
97.43  
97.42  
97.41  
97.40  
97.39  
97.38  
97.37  
97.36  
97.35  
97.34  
97.33  
97.32  
97.31  
97.30  
97.29  
97.28  
97.27  
97.26  
97.25  
97.24  
97.23  
97.22  
97.21  
97.20  
97.19  
97.18  
97.17  
97.16  
97.15  
97.14  
97.13  
97.12  
97.11  
97.10  
97.09  
97.08  
97.07  
97.06  
97.05  
97.04  
97.03  
97.02  
97.01  
97.00  
96.99  
96.98  
96.97  
96.96  
96.95  
96.94  
96.93  
96.92  
96.91  
96.90  
96.89  
96.88  
96.87  
96.86  
96.85  
96.84  
96.83  
96.82  
96.81  
96.80  
96.79  
96.78  
96.77  
96.76  
96.75  
96.74  
96.73  
96.72  
96.71  
96.70  
96.69  
96.68  
96.67  
96.66  
96.65  
96.64  
96.63  
96.62  
96.61  
96.60  
96.59  
96.58  
96.57  
96.56  
96.55  
96.54  
96.53  
96.52  
96.51  
96.50  
96.49  
96.48  
96.47  
96.46  
96.45  
96.44  
96.43  
96.42  
96.41  
96.40  
96.39  
96.38  
96.37  
96.36  
96.35  
96.34  
96.33  
96.32  
96.31  
96.30  
96.29  
96.28  
96.27  
96.26  
96.25  
96.24  
96.23  
96.22  
96.21  
96.20  
96.19  
96.18  
96.17  
96.16  
96.15  
96.14  
96.13  
96.12  
96.11  
96.10  
96.09  
96.08  
96.07  
96.06  
96.05  
96.04  
96.03  
96.02  
96.01  
96.00  
95.99  
95.98  
95.97  
95.96  
95.95  
95.94  
95.93  
95.92  
95.91  
95.90  
95.89  
95.88  
95.87  
95.86  
95.85  
95.84  
95.83  
95.82  
95.81  
95.80  
95.79  
95.78  
95.77  
95.76  
95.75  
95.74  
95.73  
95.72  
95.71  
95.70  
95.69  
95.68  
95.67  
95.66  
95.65  
95.64  
95.63  
95.62  
95.61  
95.60  
95.59  
95.58  
95.57  
95.56  
95.55  
95.54  
95.53  
95.52  
95.51  
95.50  
95.49  
95.48  
95.47  
95.46  
95.45  
95.44  
95.43  
95.42  
95.41  
95.40  
95.39  
95.38  
95.37  
95.36  
95.35  
95.34  
95.33  
95.32  
95.31  
95.30  
95.29  
95.28  
95.27  
95.26  
95.25  
95.24  
95.23  
95.22  
95.21  
95.20  
95.19  
95.18  
95.17  
95.16  
95.15  
95.14  
95.13  
95.12  
95.11  
95.10  
95.09  
95.08  
95.07  
95.06  
95.05  
95.04  
95.03  
95.02  
95.01  
95.00  
94.99  
94.98  
94.97  
94.96  
94.95  
94.94  
94.93  
94.92  
94.91  
94.90  
94.89  
94.88  
94.87  
94.86  
94.85  
94.84  
94.83  
94.82  
94.81  
94.80  
94.79  
94.78  
94.77  
94.76  
94.75  
94.74  
94.73  
94.72  
94.71  
94.70  
94.69  
94.68  
94.67  
94.66  
94.65  
94.64  
94.63  
94.62  
94.61  
94.60  
94.59  
94.58  
94.57  
94.56  
94.55  
94.54  
94.53  
94.52  
94.51  
94.50  
94.49  
94.48  
94.47  
94.46  
94.45  
94.44  
94.43  
94.42  
94.41  
94.40  
94.39  
94.38  
94.37  
94.36  
94.35  
94.34  
94.33  
94.32  
94.31  
94.30  
94.29  
94.28  
94.27  
94.26  
94.25  
94.24  
94.23  
94.22  
94.21  
94.20  
94.19  
94.18  
94.17  
94.16  
94.15  
94.14  
94.13  
94.12  
94.11  
94.10  
94.09  
94.08  
94.07  
94.06  
94.05  
94.04  
94.03  
94.02  
94.01  
94.00  
93.99  
93.98  
93.97  
93.96  
93.95  
93.94  
93.93  
93.92  
93.91  
93.90  
93.89  
93.88  
93.87  
93.86  
93.85  
93.84  
93.83  
93.82  
93.81  
93.80  
93.79  
93.78  
93.77  
93.76  
93.75  
93.74  
93.73  
93.72  
93.71  
93.70  
93.69  
93.68  
93.67  
93.66  
93.65  
93.64  
93.63  
93.62  
93.61  
93.60  
93.59  
93.58  
93.57  
93.56  
93.55  
93.54  
93.53  
93.52  
93.51  
93.50  
93.49  
93.48  
93.47  
93.46  
93.45  
93.44  
93.43  
93.42  
93.41  
93.40  
93.39  
93.38  
93.37  
93.36  
93.35  
93.34  
93.33  
93.32  
93.31  
93.30  
93.29  
93.28  
93.27  
93.26  
93.25  
93.24  
93.23  
93.22  
93.21  
93.20  
93.19  
93.18  
93.17  
93.16  
93.15  
93.14  
93.13  
93.12  
93.11  
93.10  
93.09  
93.08  
93.07  
93.06  
93.05  
93.04  
93.03  
93.02  
93.01  
93.00  
92.99  
92.98  
92.97  
92.96  
92.95  
92.94  
92.93  
92.92  
92.91  
92.90  
92.89  
92.88  
92.87  
92.86  
92.85  
92.84  
92.83  
92.82  
92.81  
92.80  
92.79  
92.78  
92.77  
92.76  
92.75  
92.74  
92.73  
92.72  
92.71  
92.70  
92.69  
92.68  
92.67  
92.66  
92.65  
92.64  
92.63  
92.62  
92.61  
92.60  
92.59  
92.58  
92.57  
92.56  
92.55  
92.54  
92.53  
92.52  
92.51  
92.50  
92.49  
92.48  
92.47  
92.46  
92.45  
92.44  
92.43  
92.42  
92.41  
92.40  
92.39  
92.38  
92.37  
92.36  
92.35  
92.34  
92.33  
92.32  
92.31  
92.30  
92.29  
92.28  
92.27  
92.26  
92.25  
92.24  
92.23  
92.22  
92.21  
92.20  
92.19  
92.18  
92.17  
92.16  
92.15  
92.14  
92.13  
92.12  
92.11  
92.10  
92.09  
92.08  
92.07  
92.06  
92.05  
92.04  
92.03  
92.02  
92.01  
92.00  
91.99  
91.98  
91.97  
91.96  
91.95  
91.94  
91.93  
91.92  
91.91  
91.90  
91.89  
91.88  
91.87  
91.86  
91.85  
91.84  
91.83  
91.82  
91.81  
91.80  
91.79  
91.78  
91.77  
91.76  
91.75  
91.74  
91.73  
91.72  
91.71  
91.70  
91.69  
91.68  
91.67  
91.66  
91.65  
91.64  
91.63  
91.62  
91.61  
91.60  
91.59  
91.58  
91.57  
91.56  
91.55  
91.54  
91.53  
91.52  
91.51  
91.50  
91.49  
91.48  
91.47  
91.46  
91.45  
91.44  
91.43  
91.42  
91.41  
91.40  
91.39  
91.38  
91.37  
91.36  
91.35  
91.34  
91.33  
91.32  
91.31  
91.30  
91.29  
91.28  
91.27  
91.26  
91.25  
91.24  
91.23  
91.22  
91.21  
91.20  
91.19  
91.18  
91.17  
91.16  
91.15  
91.14  
91.13  
91.12  
91.11  
91.10  
91.09  
91.08  
91.07  
91.06  
91.05  
91.04  
91.03  
91.02  
91.01  
91.00  
90.99  
90.98  
90.97  
90.96  
90.95  
90.94  
90.93  
90.92  
90.91  
90.90  
90.89  
90.88  
90.87  
90.86  
90.85  
90.84  
90.83  
90.82  
90.81  
90.80  
90.79  
90.78  
90.77  
90.76  
90.75  
90.74  
90.73  
90.72  
90.71  
90.70  
90.69  
90.68  
90.67  
90.66  
90.65  
90.64  
90.63  
90.62  
90.61  
90.60  
90.59  
90.58  
90.57  
90.56  
90.55  
90.54  
90.53  
90.52  
90.51  
90.50  
90.49  
90.48  
90.47  
90.46  
90.45  
90.44  
90.43  
90.42  
90.41  
90.40  
90.39  
90.38  
90.37  
90.36  
90.35  
90.34  
90.33  
90.32  
90.31  
90.30  
90.29  
90.28  
90.27  
90.26  
90.25  
90.24  
90.23  
90.22  
90.21  
90.20  
90.19  
90.18  
90.17  
90.16  
90.15  
90.14  
90.13  
90.12  
90.11  
90.10  
90.09  
90.08  
90.07  
90.06  
90.05  
90.04  
90.03  
90.02  
90.01  
90.00  
89.99  
89.98  
89.97  
89.96  
89.95  
89.94  
89.93  
89.92  
89.91  
89.90  
89.89  
89.88  
89.87  
89.86  
89.85  
89.84  
89.83  
89.82  
89.81  
89.80  
89.79  
89.78  
89.77  
89.76  
89.75  
89.74  
89.73  
89.72  
89.71  
89.70  
89.69  
89.68  
89.67  
89.66  
89.65  
89.64  
89.63  
89.62  
89.61  
89.60  
89.59  
89.58  
89.57  
89.56  
89.55  
89.54  
89.53  
89.52  
89.51  
89.50  
89.49  
89.48  
89.47  
89.46  
89.45  
89.44  
89.43  
89.42  
89.41  
89.40  
89.39  
89.38  
89.37  
89.36  
89.35  
89.34  
89.33  
89.32  
89.31  
89.30  
89.29  
89.28  
89.27  
89.26  
89.25  
89.24  
89.23  
89.22  
89.21  
89.20  
89.19  
89.18  
89.17  
89.16  
89.15  
89.14  
89.13  
89.12  
89.11  
89.10  
89.09  
89.08  
89.07  
89.06  
89.05  
89.04  
89.03  
89.02  
89.01  
89.00  
88.99  
88.98  
88.97  
88.96  
88.95  
88.94  
88.93  
88.92  
88.91  
88.90  
88.89  
88.88  
88.87  
88.86  
88.85  
88.84  
88.83  
88.82  
88.81  
88.80  
88.79  
88.78  
88.77  
88.76  
88.75  
88.74  
88.73  
88.72  
88.71  
88.70  
88.69  
88.68  
88.67  
88.66  
88.65  
88.64  
88.63  
88.62  
88.61  
88.60  
88.59  
88.58  
88.57  
88.56  
88.55  
88.54  
88.53  
88.52  
88.51  
88.50  
88.49  
88.48  
88.47  
88.46  
88.45  
88.44  
88.43  
88.42  
88.41  
88.40  
88.39  
88.38  
88.37  
88.36  
88.35  
88.34  
88.33  
88.32  
88.31  
88.30  
88.29  
88.28  
88.27  
88.26  
88.25  
88.24  
88.23  
88.22  
88.21  
88.20  
88.19  
88.18  
88.17  
88.16  
88.15  
88.14  
88.13  
88.12  
88.11  
88.10  
88.09  
88.08  
88.07  
88.06  
88.05  
88.04  
88.03  
88.02  
88.01  
88.00  
87.99  
87.98  
87.97  
87.96  
87.95  
87.94  
87.93  
87.92  
87.91  
87.90  
87.89  
87.88  
87.87  
87.86  
87.85  
87.84  
87.83  
87.82  
87.81  
87.80  
87.79  
87.78  
87.77  
87.76  
87.75  
87.74  
87.73  
87.72  
87.71  
87.70  
87.69  
87.68  
87.67  
87.66  
87.65  
87.64  
87.63  
87.62  
87.61  
87.60  
87.59  
87.58  
87.57  
87.56  
87.55  
87.54  
87.53  
87.52  
87.51  
87.50  
87.49  
87.48  
87.47  
87.46  
87.45  
87.44  
87.43  
87.42  
87.41  
87.40  
87.39  
87.38  
87.37  
87.36  
87.35  
87.34  
87.33  
87.32  
87.31  
87.30  
87.29  
87.28  
87.27  
87.26  
87.25  
87.24  
87.23  
87.22  
87.21  
87.20  
87.19  
87.18  
87.17  
87.16  
87.15  
87.14  
87.13  
87.12  
87.11  
87.10  
87.09  
87.08  
87.07  
87.06  
87.05  
87.04  
87.03  
87.02  
87.01  
87.00  
86.99  
86.98  
86.97  
86.96  
86.95  
86.94  
86.93  
86.92  
86.91  
86.90  
86.89  
86.88  
86.87  
86.86  
86.85  
86.84  
86.83  
86.82  
86.81  
86.80  
86.79  
86.78  
86.77  
86.76  
86.75  
86.74  
86.73  
86.72  
86.71  
86.70  
86.69  
86.68  
86.67  
86.66  
86.65  
86.64  
86.63  
86.62  
86.61  
86.60  
86.59  
86.58  
86.57  
86.56  
86.55  
86.54  
86.53  
86.52  
86.51  
86.50  
86.49  
86.48  
86.47  
86.46  
86.45  
86.44  
86.43  
86.42  
86.41  
86.40  
86.39  
86.38  
86.37  
86.36  
86.35  
86.34  
86.33  
86.32  
86.31  
86.30  
86.29  
86.28  
86.27  
86.26  
86.25  
86.24  
86.23  
86.22  
86.21  
86.20  
86.19  
86.18  
86.17  
86.16  
86.15  
86.14  
86.13  
86.12  
86.11  
86.10  
86.09  
86.08  
86.07  
86.06  
86.05  
86.04  
86.03  
86.02  
86.01  
86.00  
85.99  
85.98  
85.97  
85.96  
85.95  
85.94  
85.93  
85.92  
85.91  
85.90  
85.89  
85.88  
85.87  
85.86  
85.85  
85.84  
85.83  
85.82  
85.81  
85.80  
85.79  
85.78  
85.77  
85.76  
85.75  
85.74  
85.73  
85.72  
85.71  
85.70  
85.69  
85.68  
85.67  
85.66  
85.65  
85.64  
85.63  
85.62  
85.61  
85.60  
85.59  
85.58  
85.57  
85.56  
85.55  
85.54  
85.53  
85.52  
85.51  
85.50  
85.49  
85.48  
85.47  
85.46  
85.45  
85.44  
85.43  
85.42  
85.41  
85.40  
85.39  
85.38  
85.37  
85.36  
85.35  
85.34  
85.33  
85.32  
85.31  
85.30  
85.29  
85.28  
85.27  
85.26  
85.25  
85.24  
85.23  
85.22  
85.21  
85.20  
85.19  
85.18  
85.17  
85.16  
85.15  
85.14  
85.13  
85.12  
85.11  
85.10  
85.09  
85.08  
85.07  
85.06  
85.05  
85.04  
85.03  
85.02  
85.01  
85.00  
84.99  
84.98  
84.97  
84.96  
84.95  
84.94  
84.93  
84.92  
84.91  
84.90  
84.89  
84.88  
84.87  
84.86  
84.85  
84.84  
84.83  
84.82  
84.81  
84.80  
84.79  
84.78  
84.77  
84.76  
84.75  
84.74  
84.73  
84.72  
84.71  
84.70  
84.69  
84.68  
84.67  
84.66  
84.65  
84.64  
84.63  
84.62  
84.61  
84.60  
84.59  
84.58  
84.57  
84.56  
84.5

14095  
PB\_Reduction

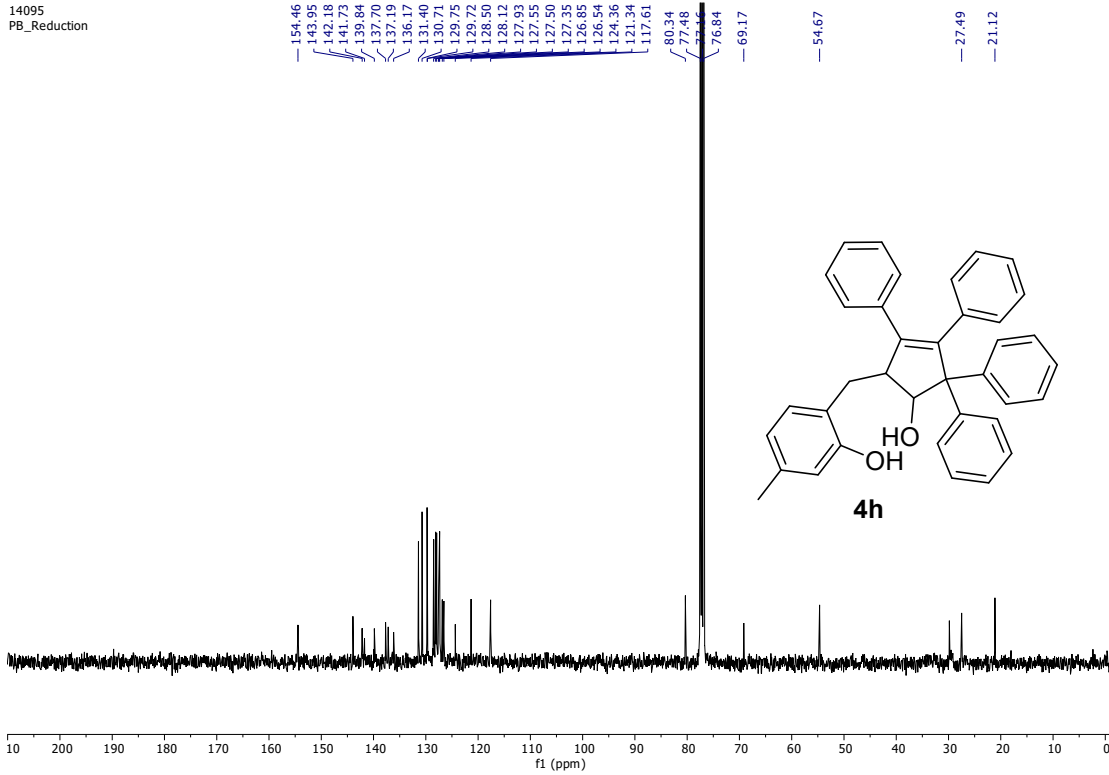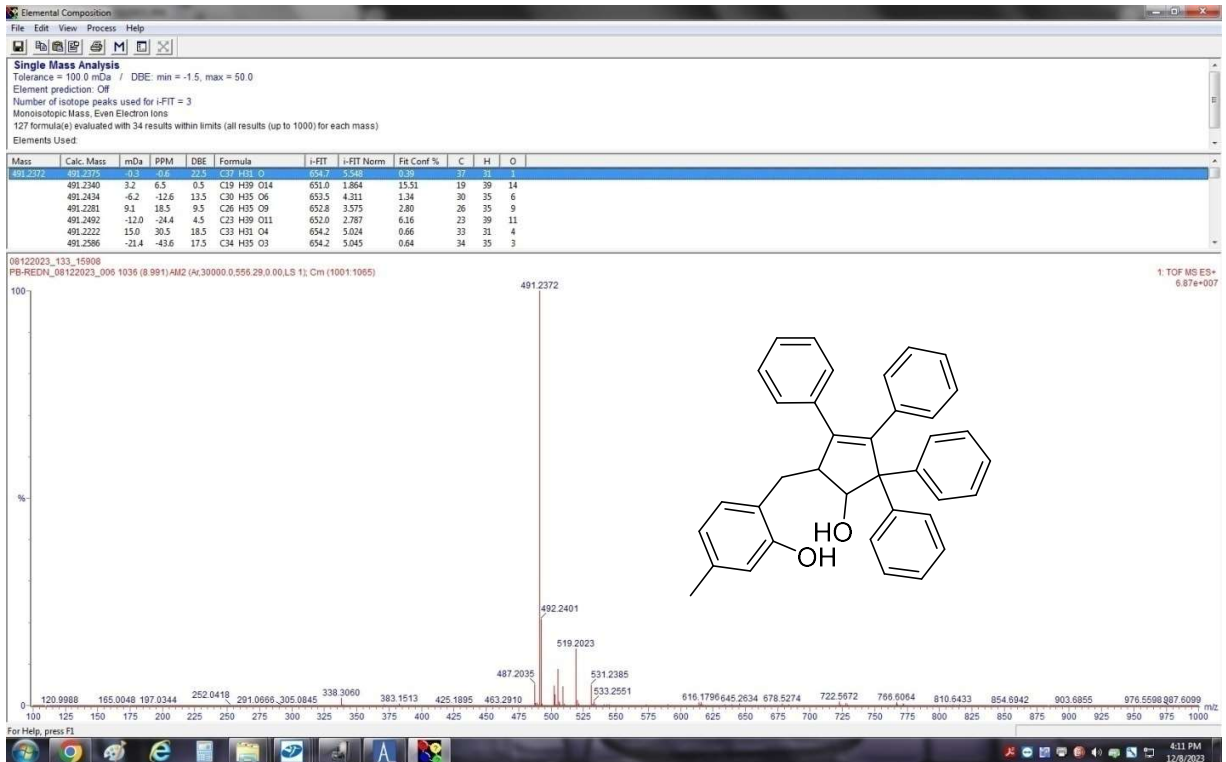

## Structure determination of 3aj

### HMQC spectrum of 3aj

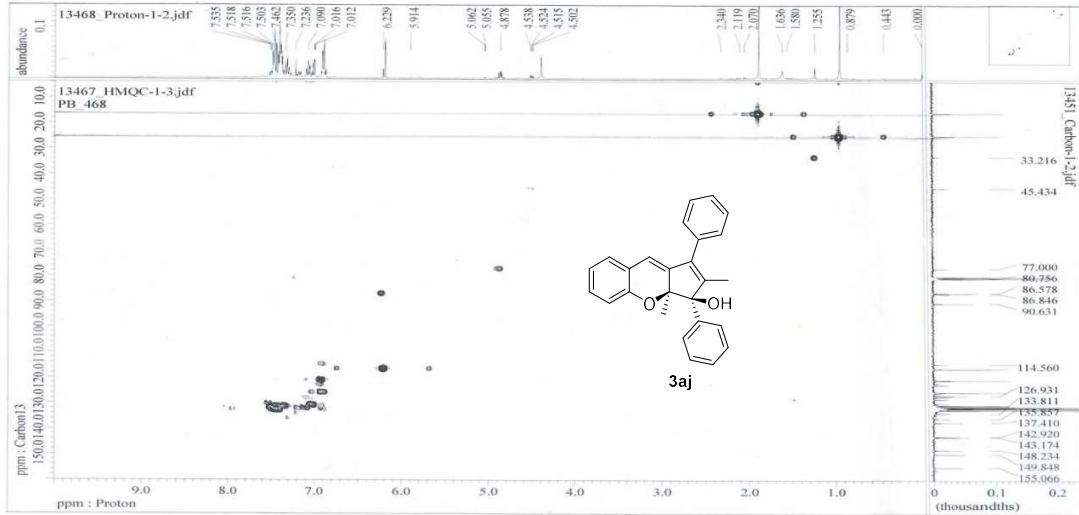

### HMBC spectrum of 3aj

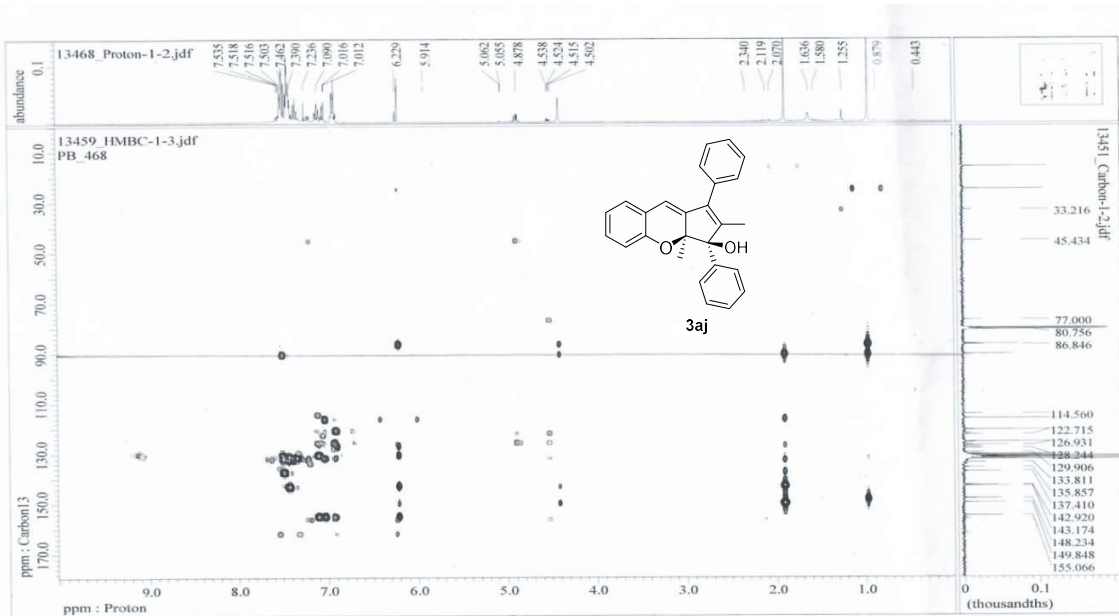



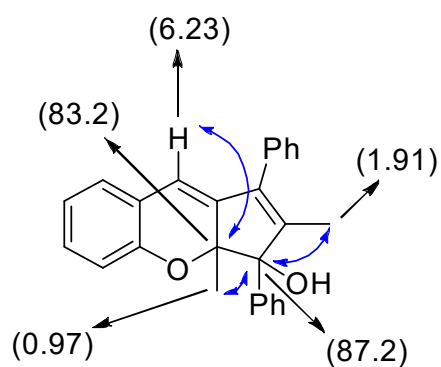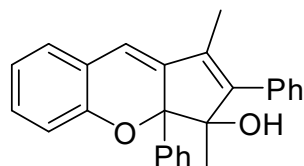

(In this minor isomer OH group is showing a quartet in  $^1\text{H}$  NMR at  $\delta$  4.54)

**Figure 2.** Major correlations in HMBC of **3aj**

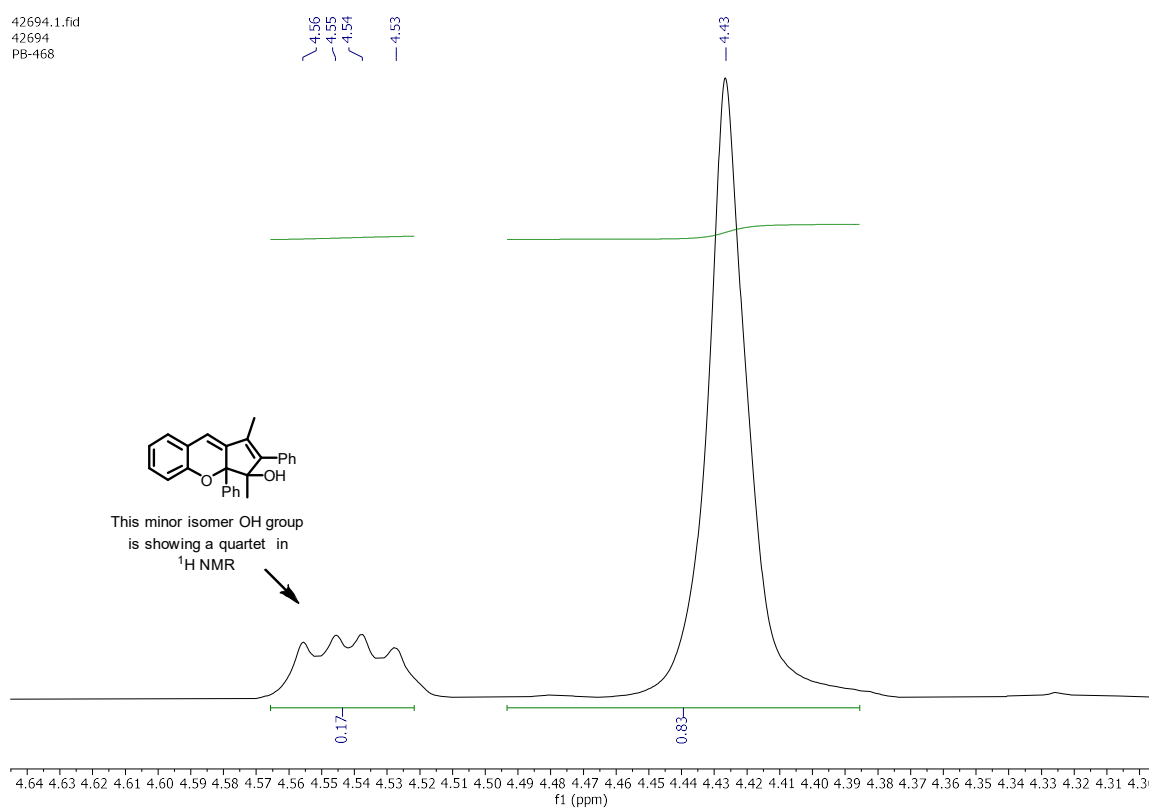

## Structure determination of 4a

### HMBC and NOE spectra of 4a

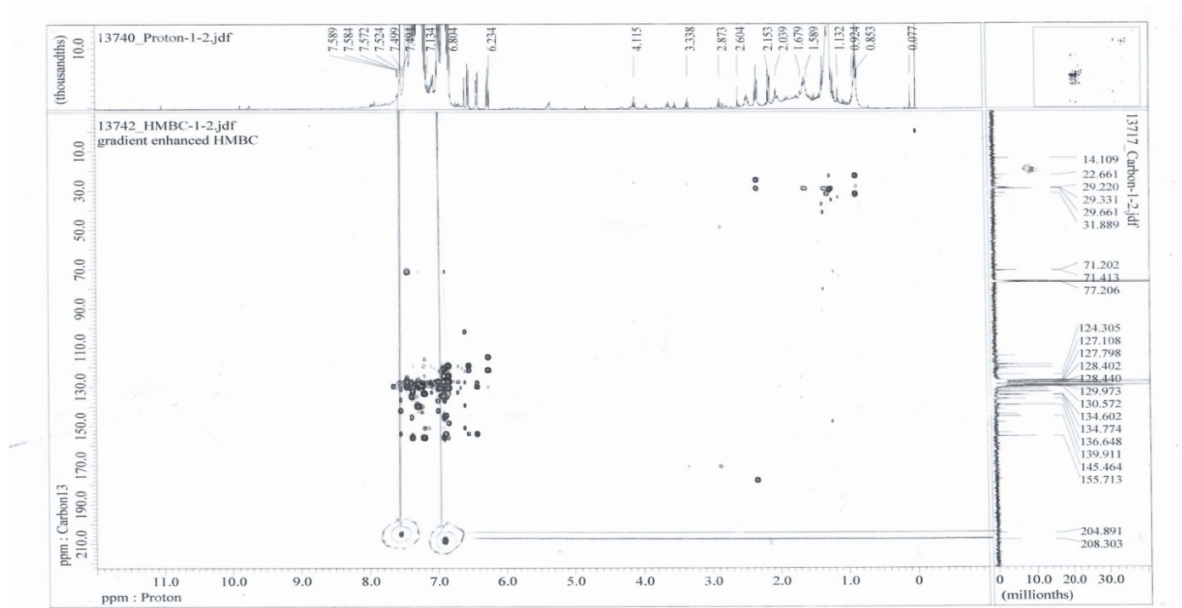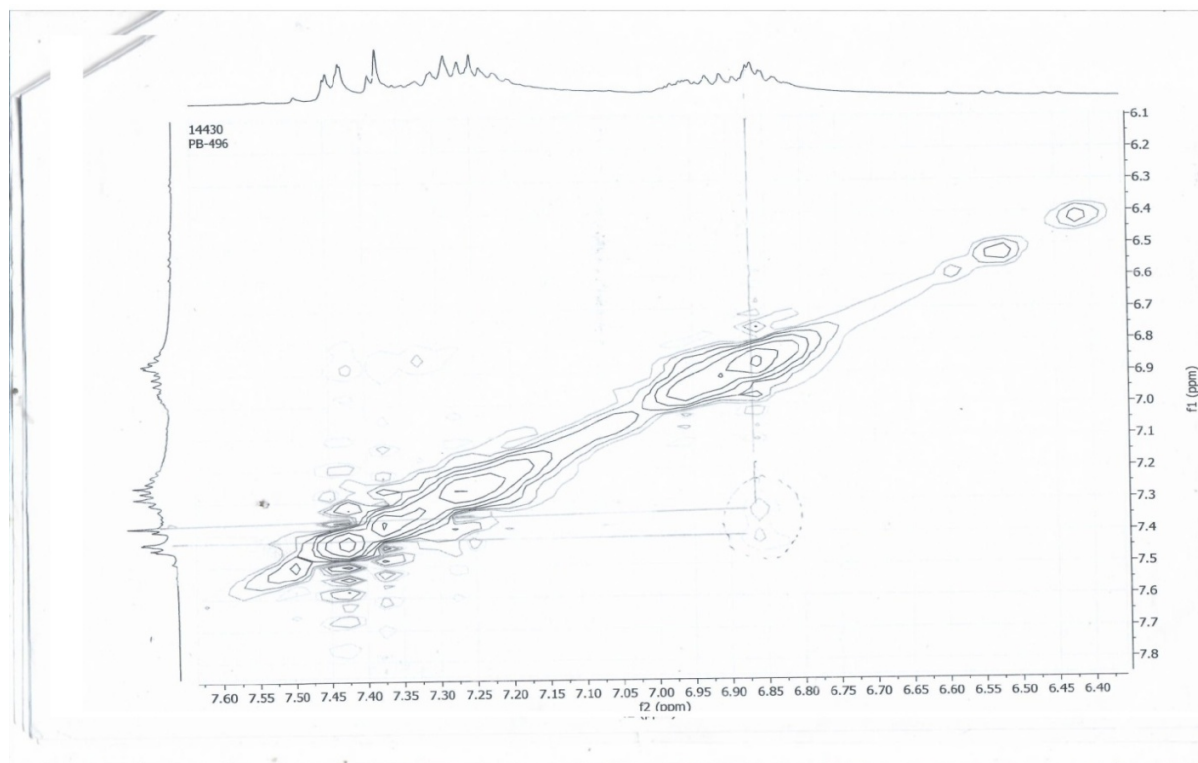

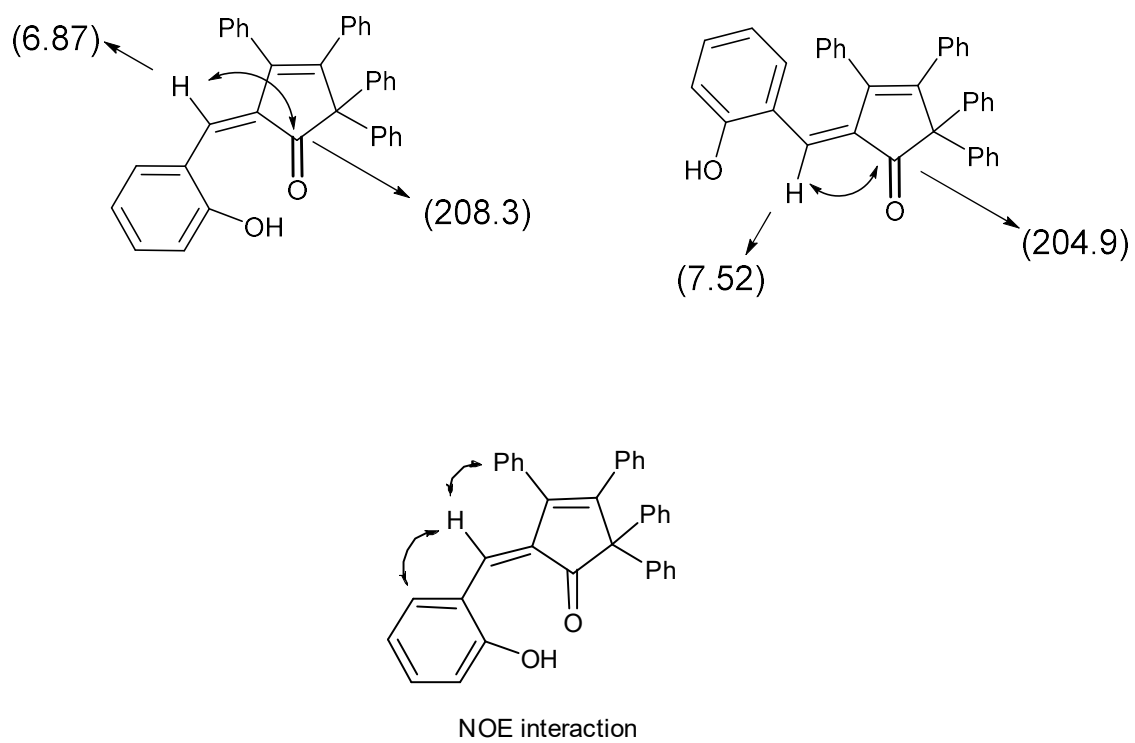

**Figure 3.** Major HMBC and NOE interactions of **4a**

# HMBC and HMQC spectra of 4h

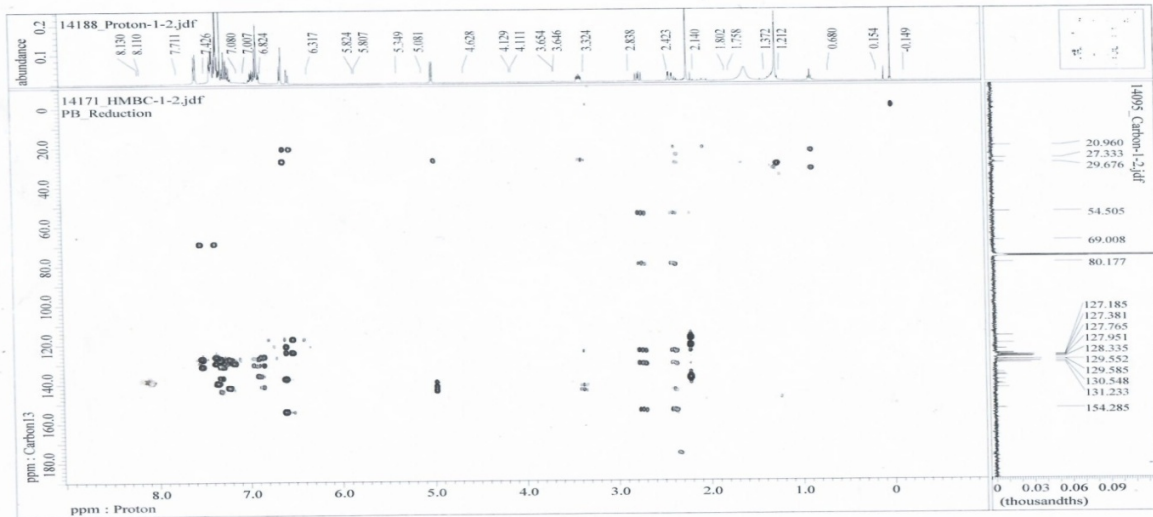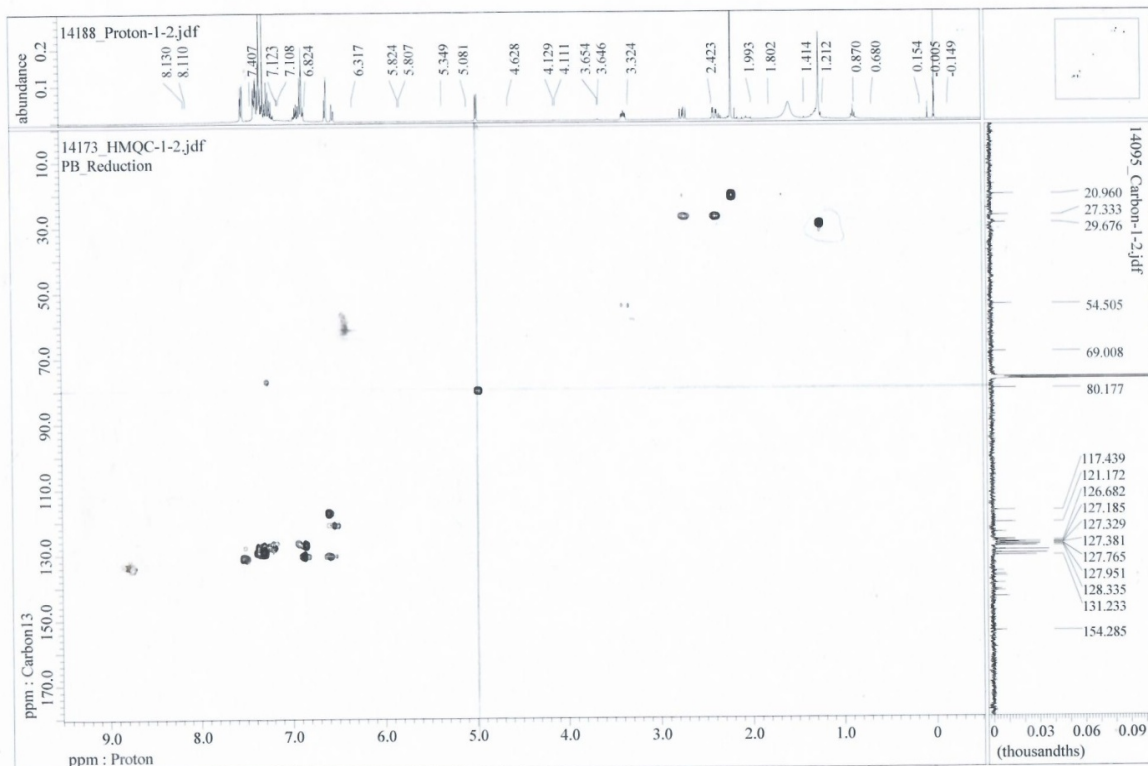

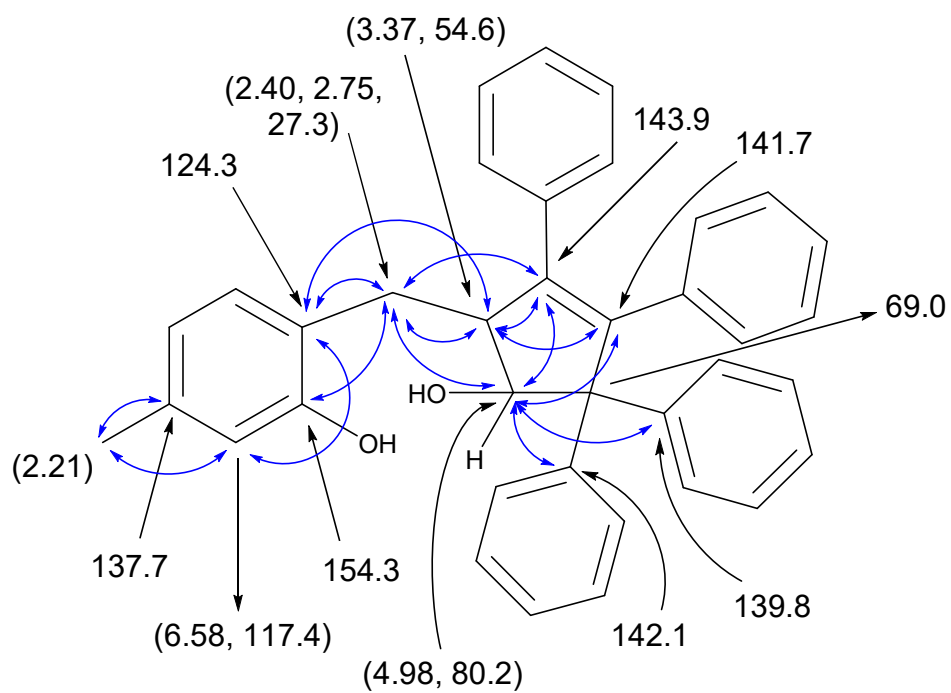

**Figure 4.** Significant correlations in HMBC of **4h**
